# Supplementary material
Source: PubMed Central journal article supplement (PMC3357189)

(6*R*,8*R*,9*S*,10*R*,13*S*,14*S*)-6-bromo-10,13-dimethyl-7,8,9,10,11,12,13,14,15,16-decahydro-3*H*-cyclopenta[ $\alpha$ ]phenanthrene-3,17(6*H*)-dione

Scheme1-Int 1

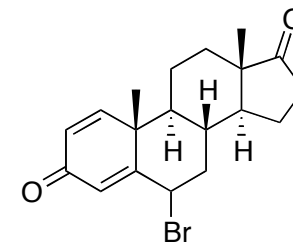

DMR277

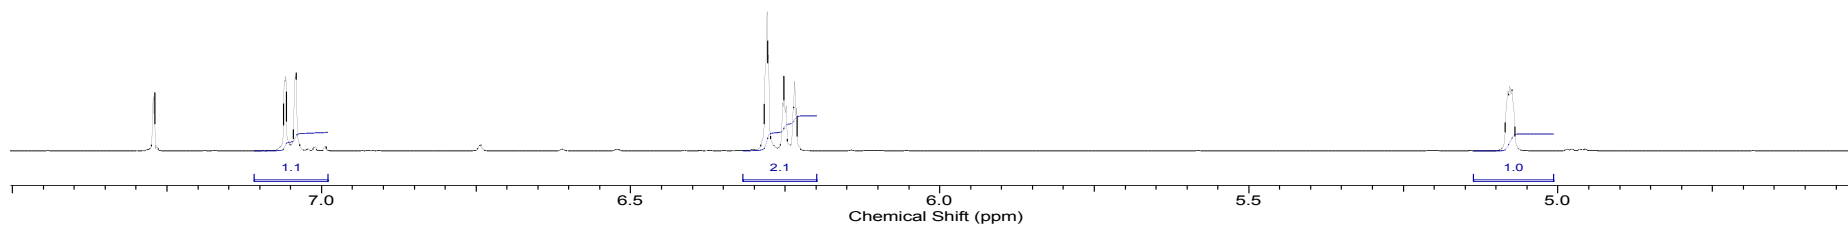

DMR277

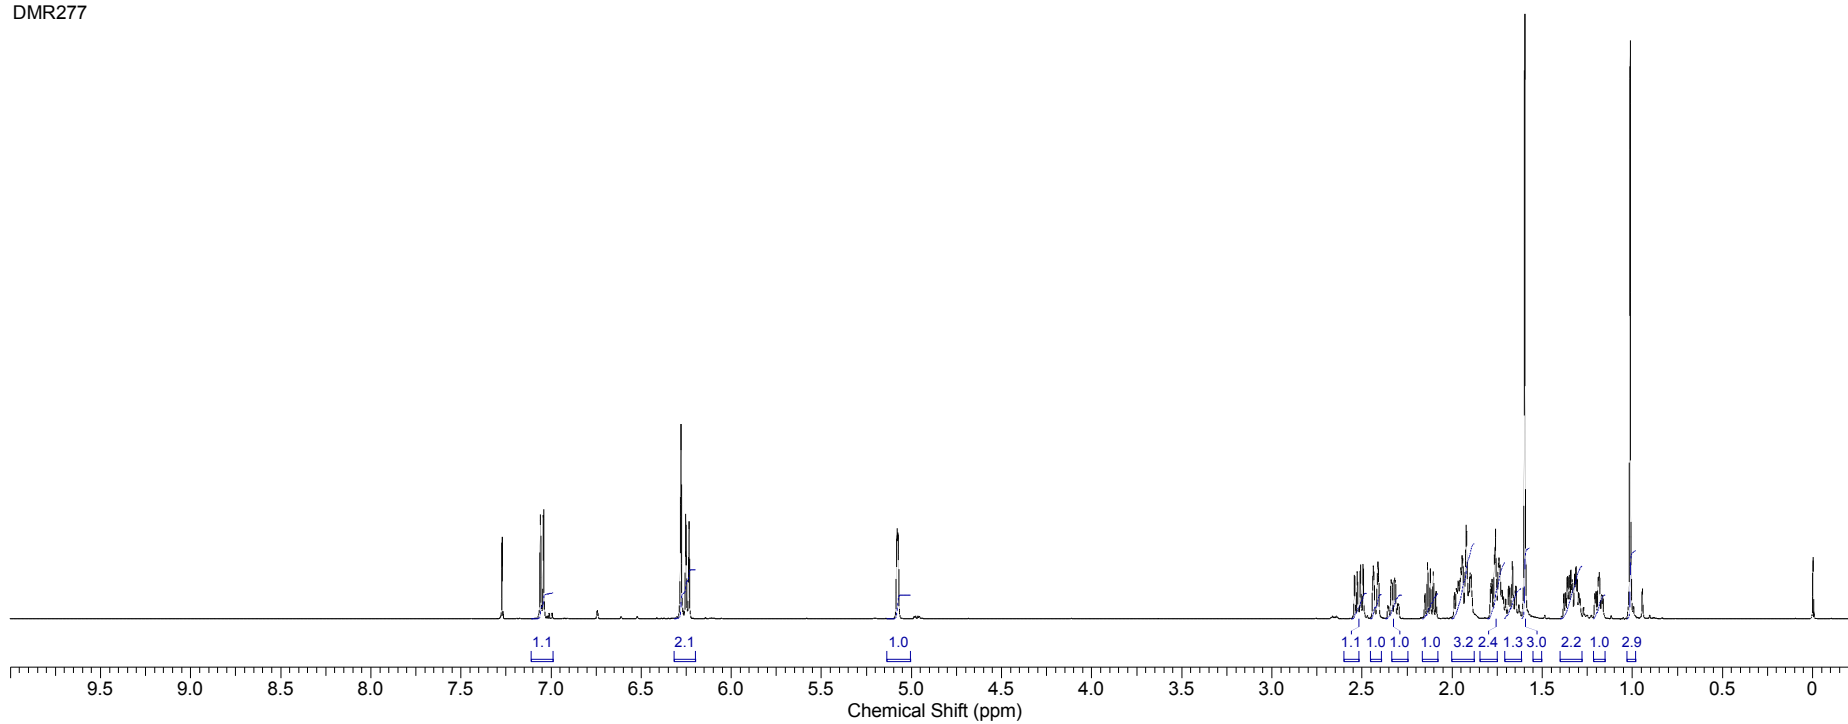

(6*R*,8*R*,9*S*,10*R*,13*S*,14*S*)-6-bromo-10,13-dimethyl-7,8,9,10,11,12,13,14,15,16-decahydro-3*H*-cyclopenta[ $\alpha$ ]phenanthrene-3,17(6*H*)-dione

Scheme1-Int 1

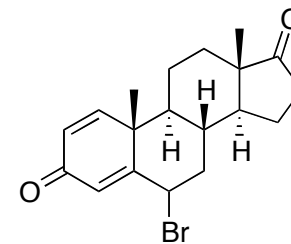

DMR454CARBON

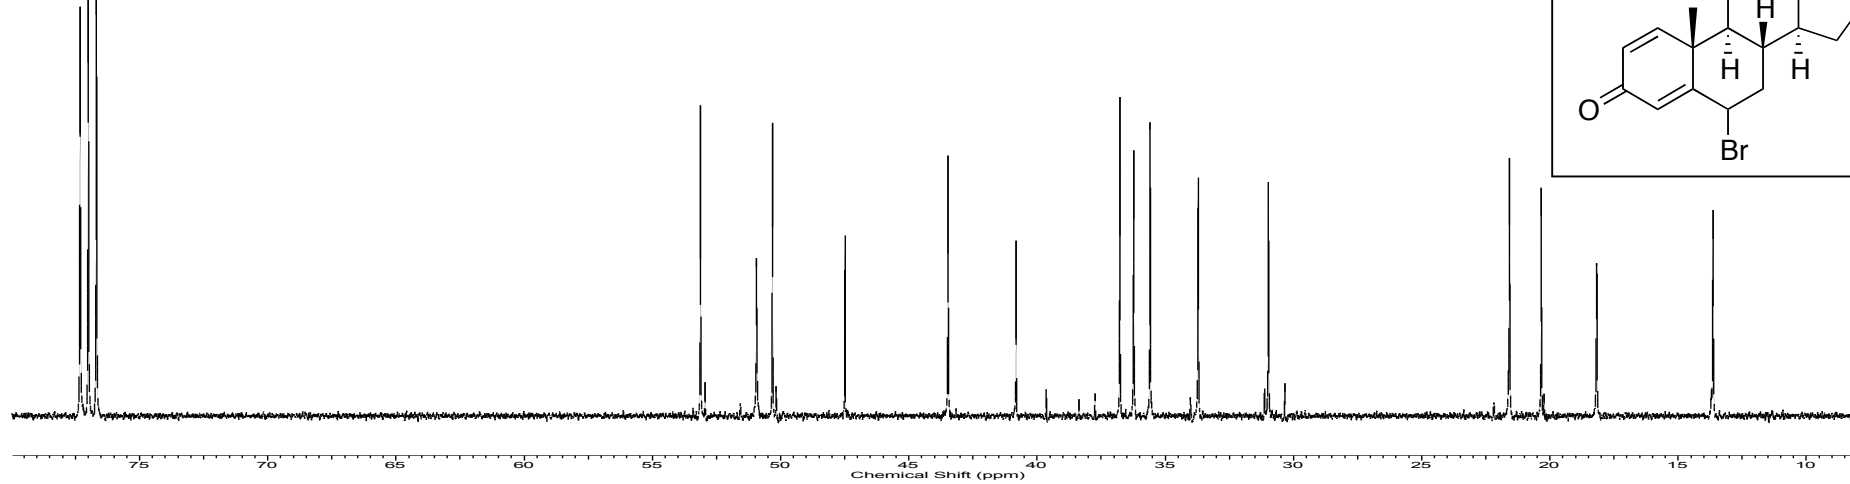

DMR454CARBON

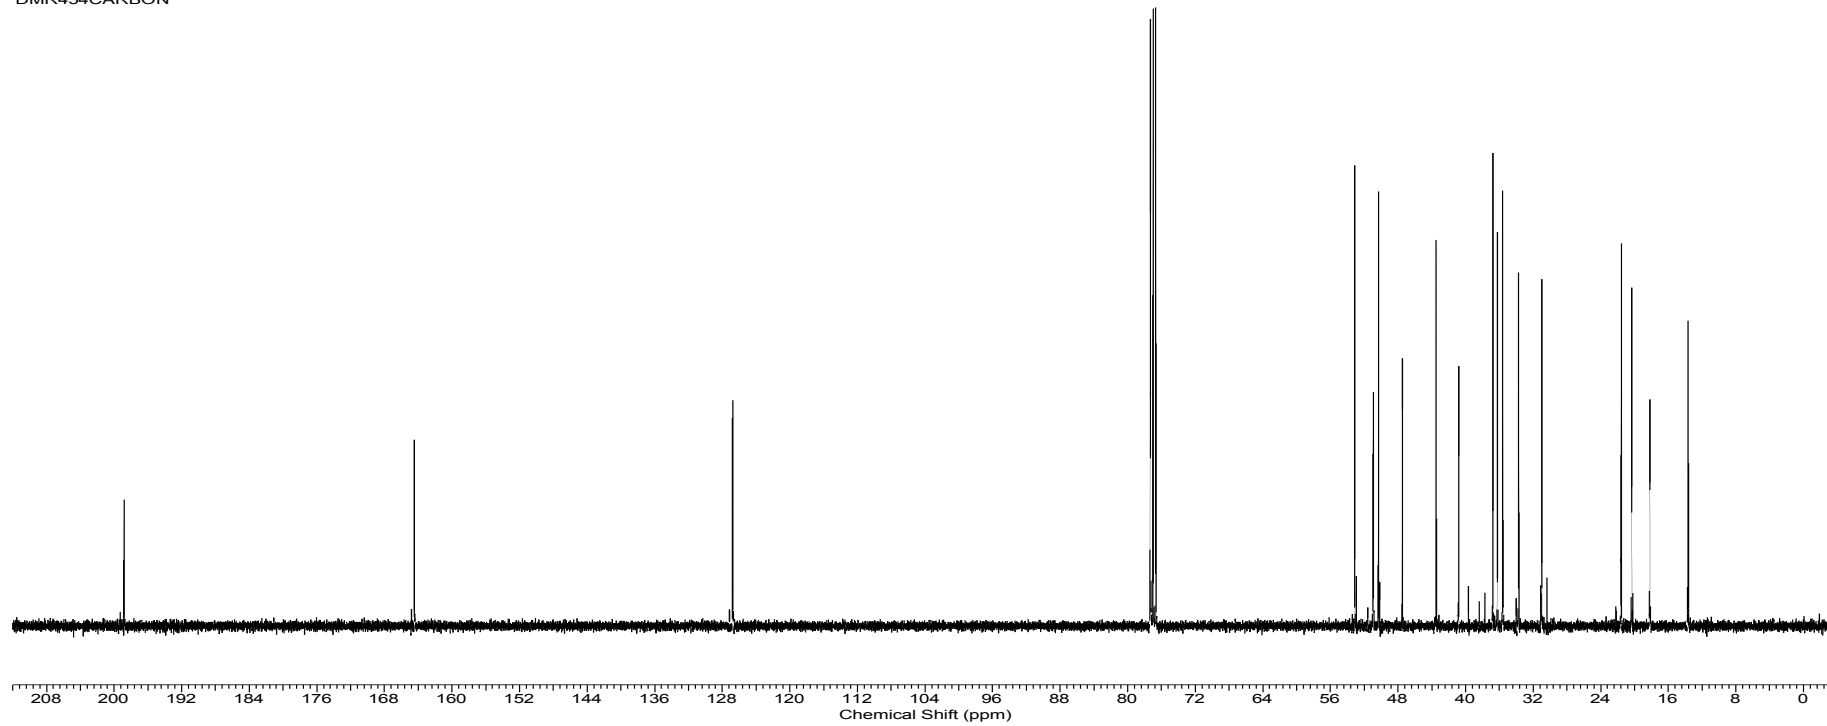

(8*R*,9*S*,10*R*,13*S*,14*S*)-10,13-dimethyl-7,8,9,10,11,12,13,14,15,16-decahydro-3*H*-cyclopenta[ $\alpha$ ]phenanthrene-3,17(4*H*)-dione

Scheme1-Int 2

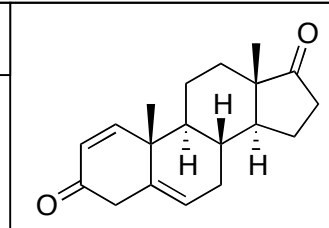

HDDG002 PROTON

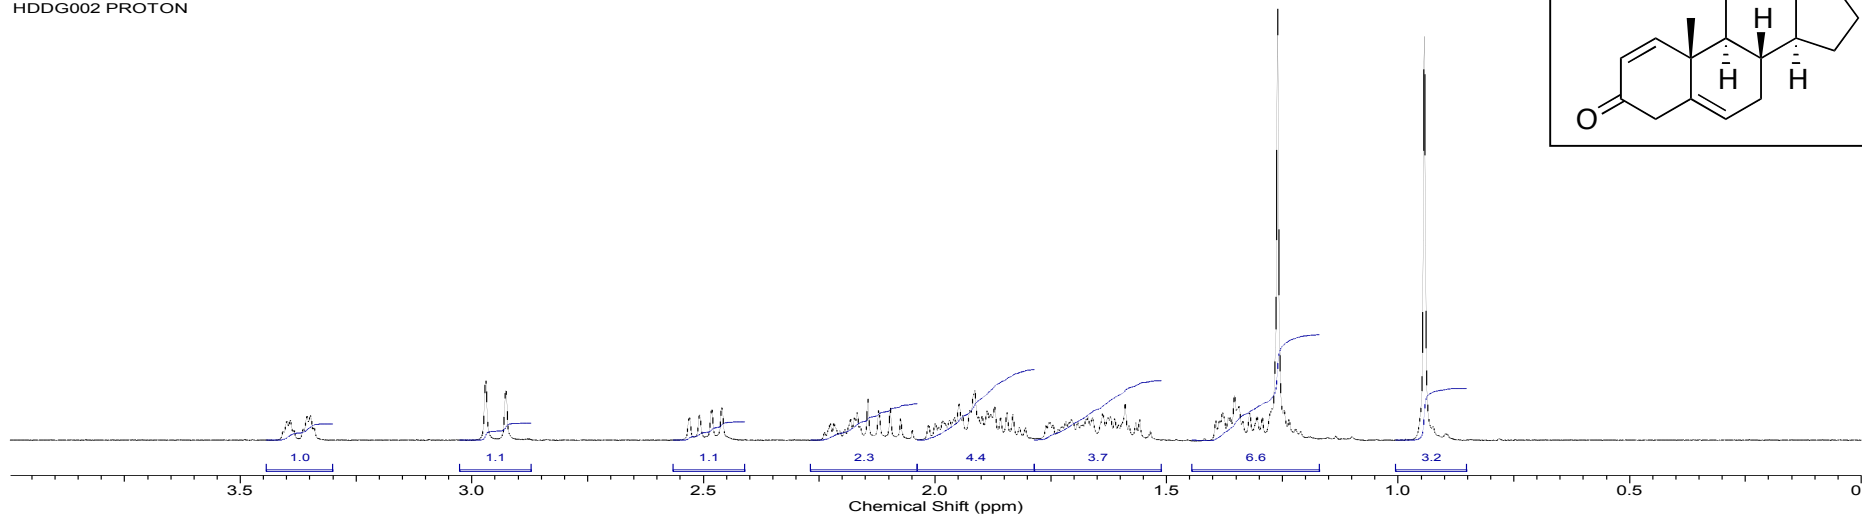

HDDG002 PROTON

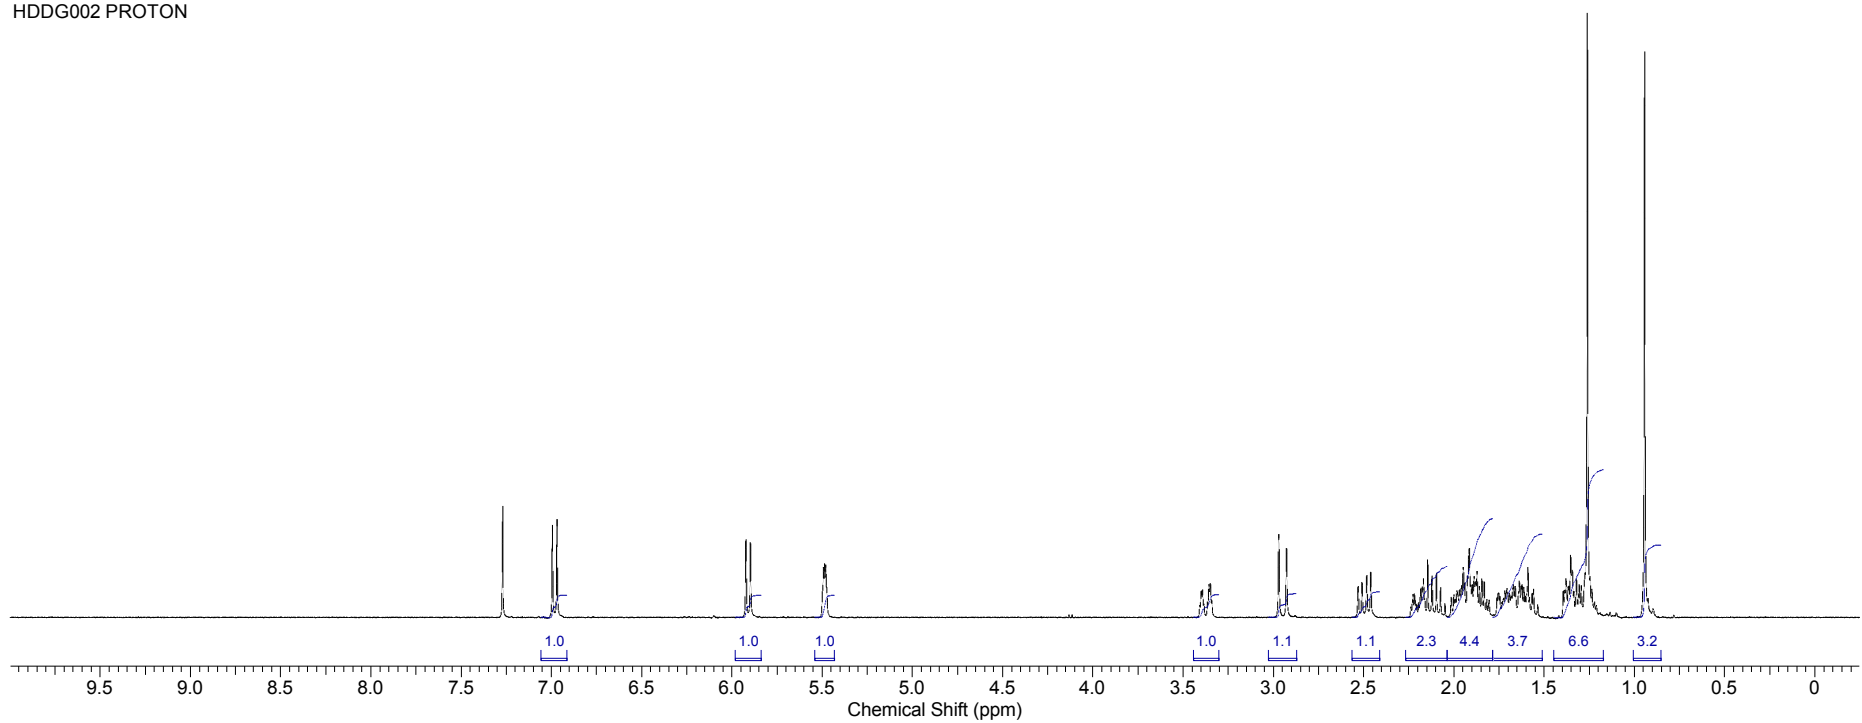

(8*R*,9*S*,10*R*,13*S*,14*S*)-10,13-dimethyl-7,8,9,10,11,12,13,14,15,16-decahydro-3*H*-cyclopenta[*a*]phenanthrene-3,17(4*H*)-dione

Scheme 1-Int 2

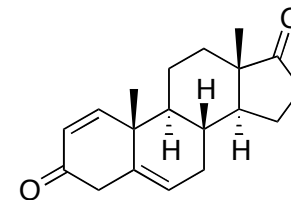

HDDG002 CARBON

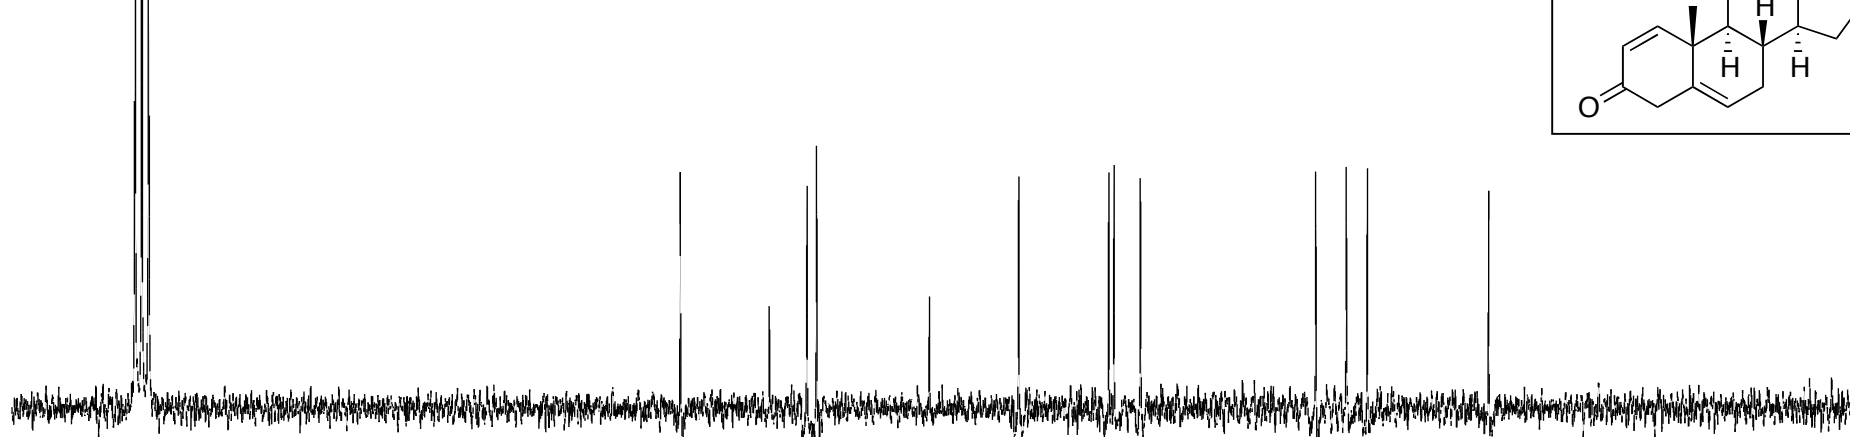

HDDG002 CARBON

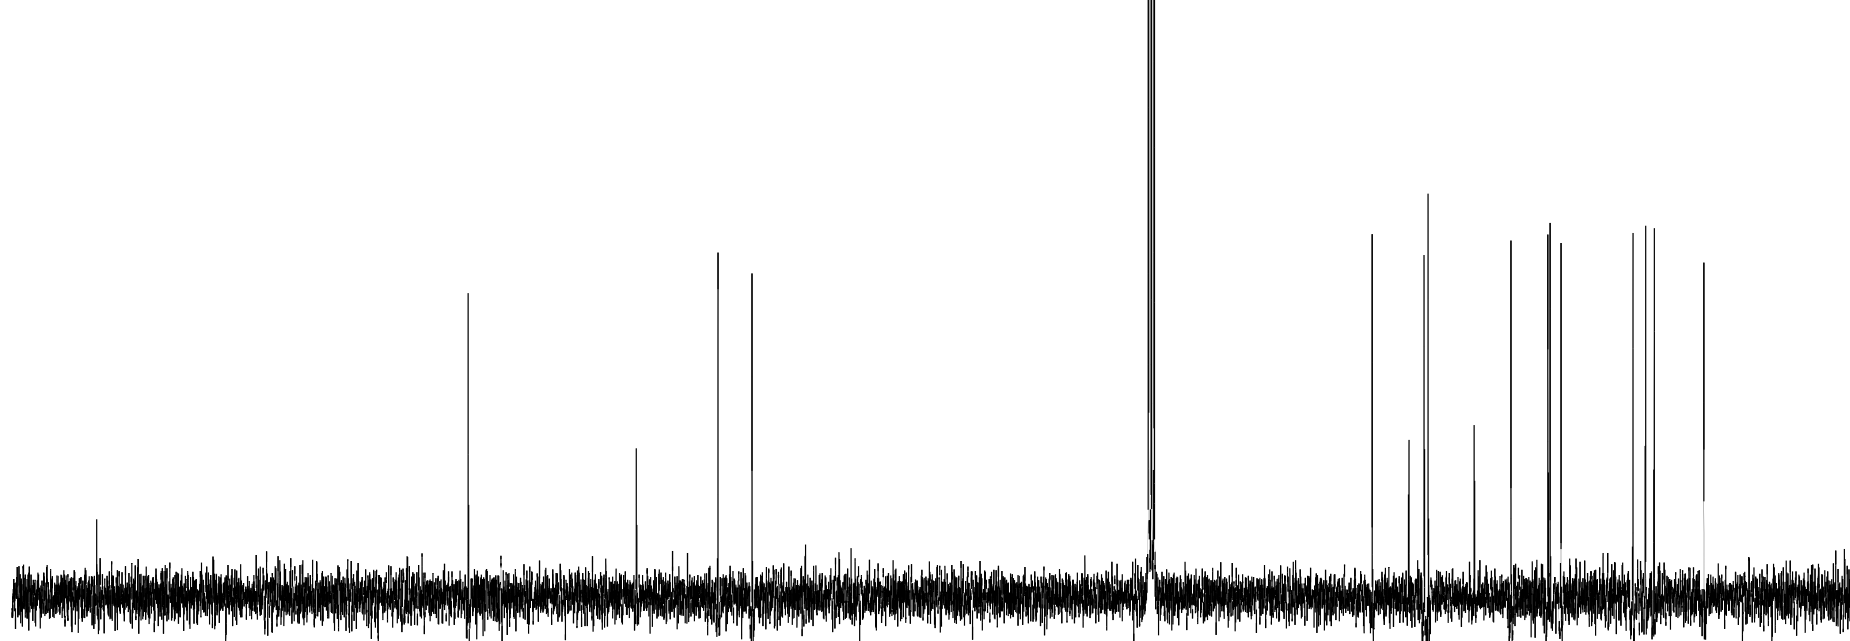

200 192 184 176 168 160 152 144 136 128 120 112 104 96 88 80 72 64 56 48 40 32 24 16 8 0  
Chemical Shift (ppm)



(6*S*,8*R*,9*S*,10*R*,13*S*,14*S*)-6-bromo-10,13-dimethyl-7,8,9,10,11,12,13,14,15,16-decahydro-1*H*-cyclopenta[ $\alpha$ ]phenanthrene-3,17(2*H*,6*H*)-dione

Scheme 1-Int 3

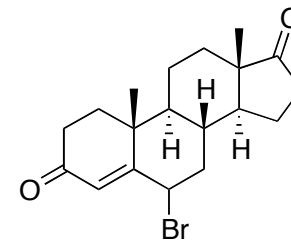

DMR454LONG

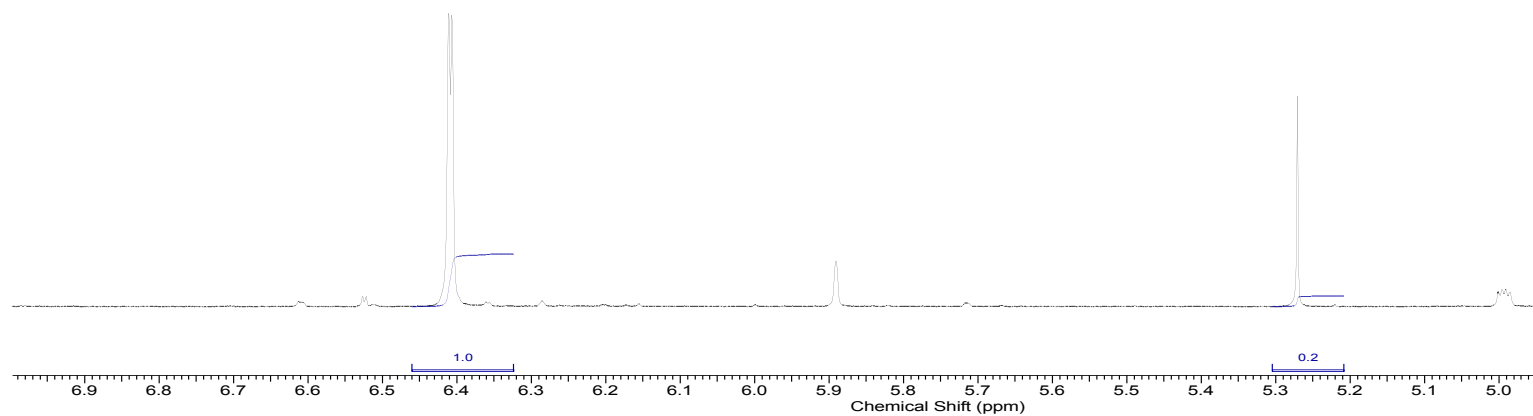

DMR454LONG

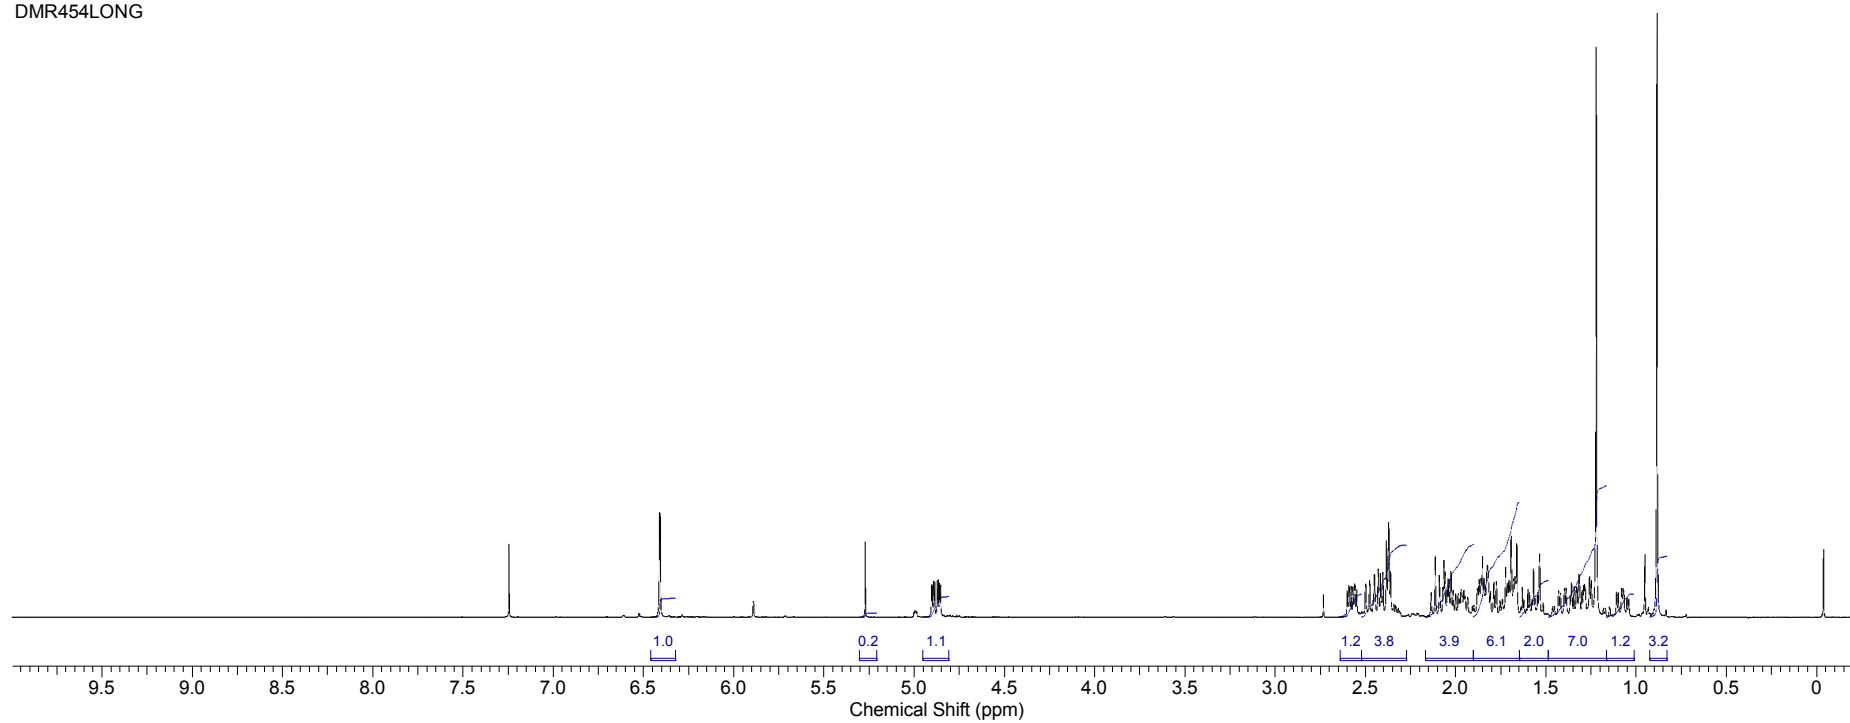

(6*S*,8*R*,9*S*,10*R*,13*S*,14*S*)-6-bromo-10,13-dimethyl-7,8,9,10,11,12,13,14,15,16-decahydro-1*H*-cyclopenta[ $\alpha$ ]phenanthrene-3,17(2*H*,6*H*)-dione

Scheme 1-Int 3

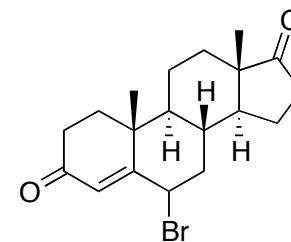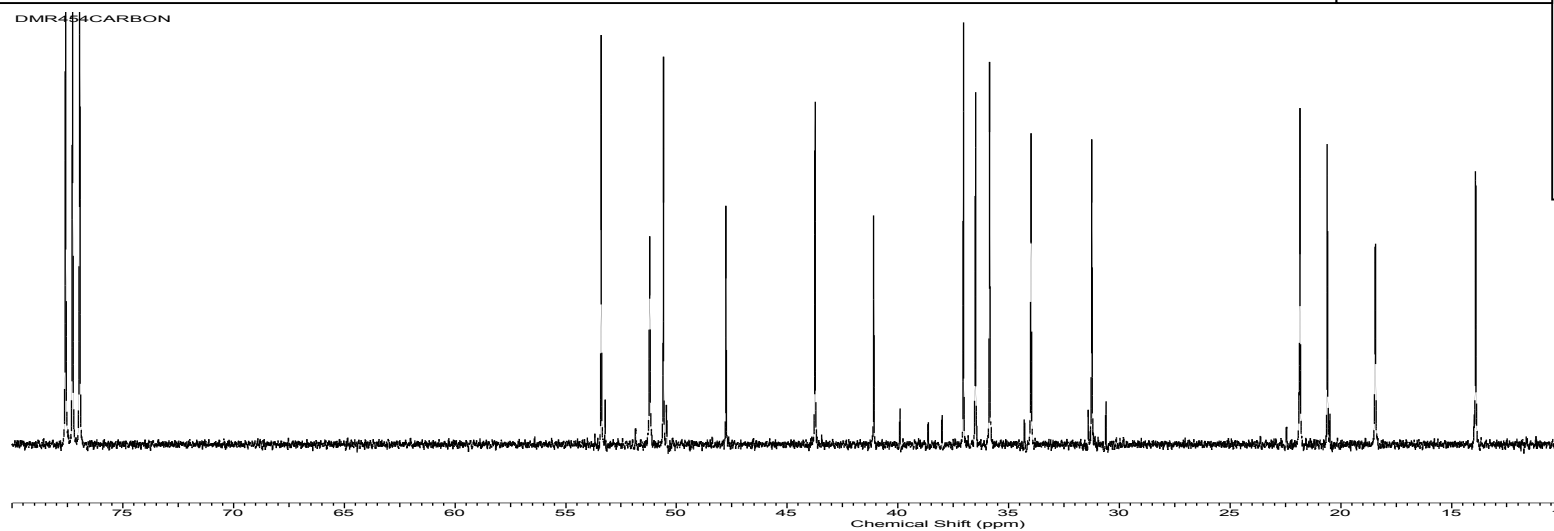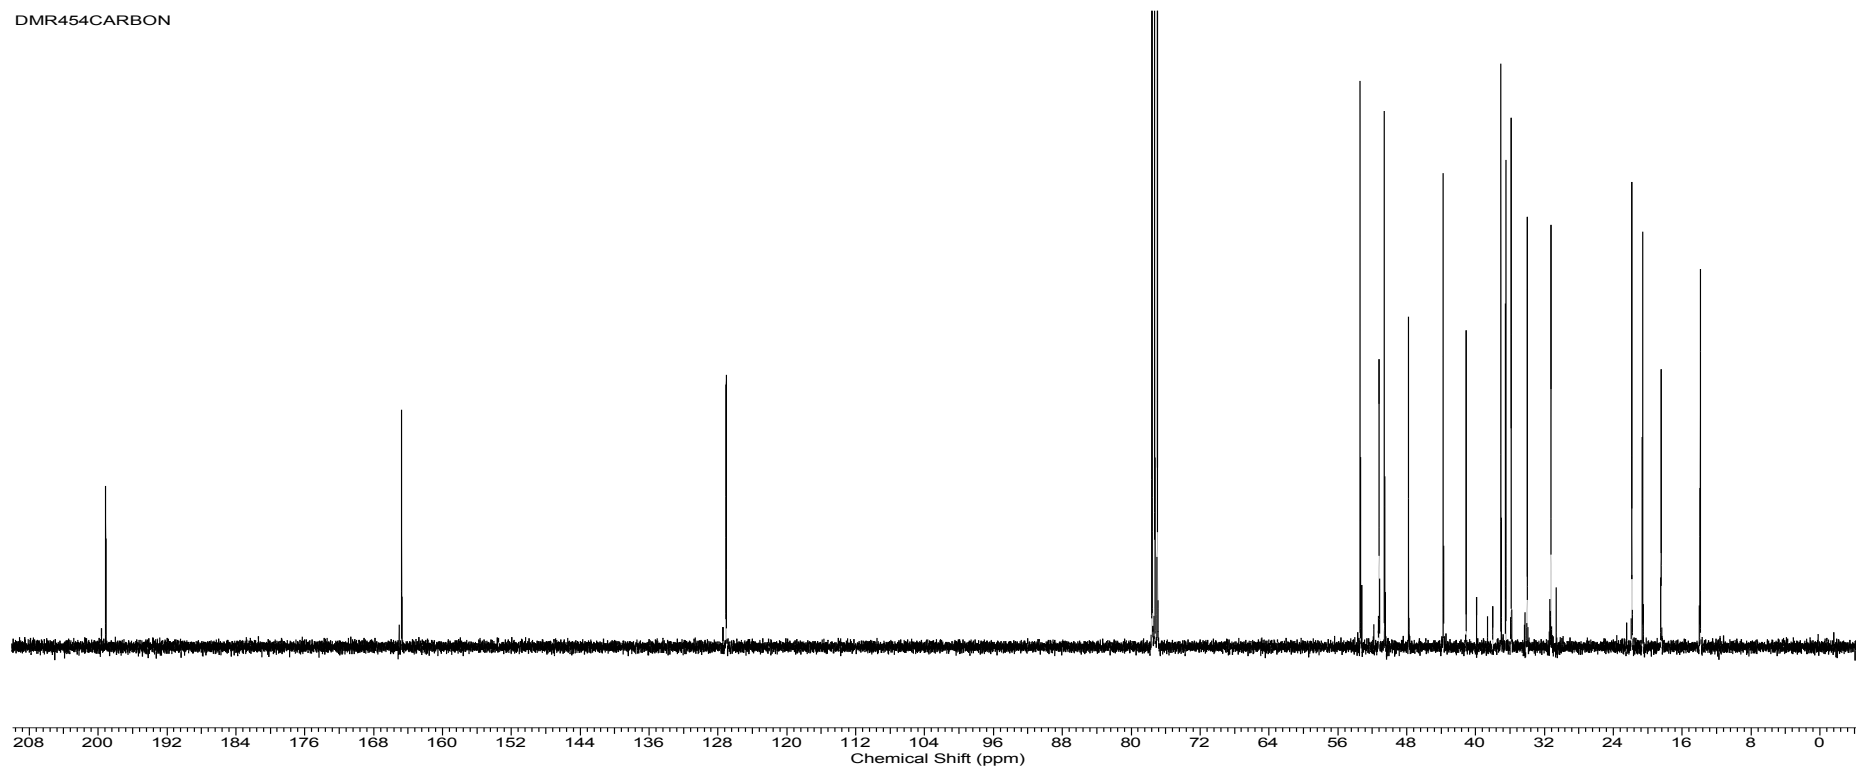

(8*R*,9*S*,10*R*,13*S*,14*S*)-10,13-dimethyl-7,8,9,10,11,12,13,14,15,16-decahydro-1*H*-cyclopenta[*a*]phenanthrene-3,17(2*H*,4*H*)-dione

Scheme 1-Int 4

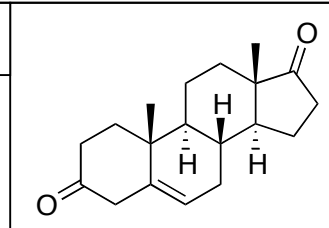

DMR416A

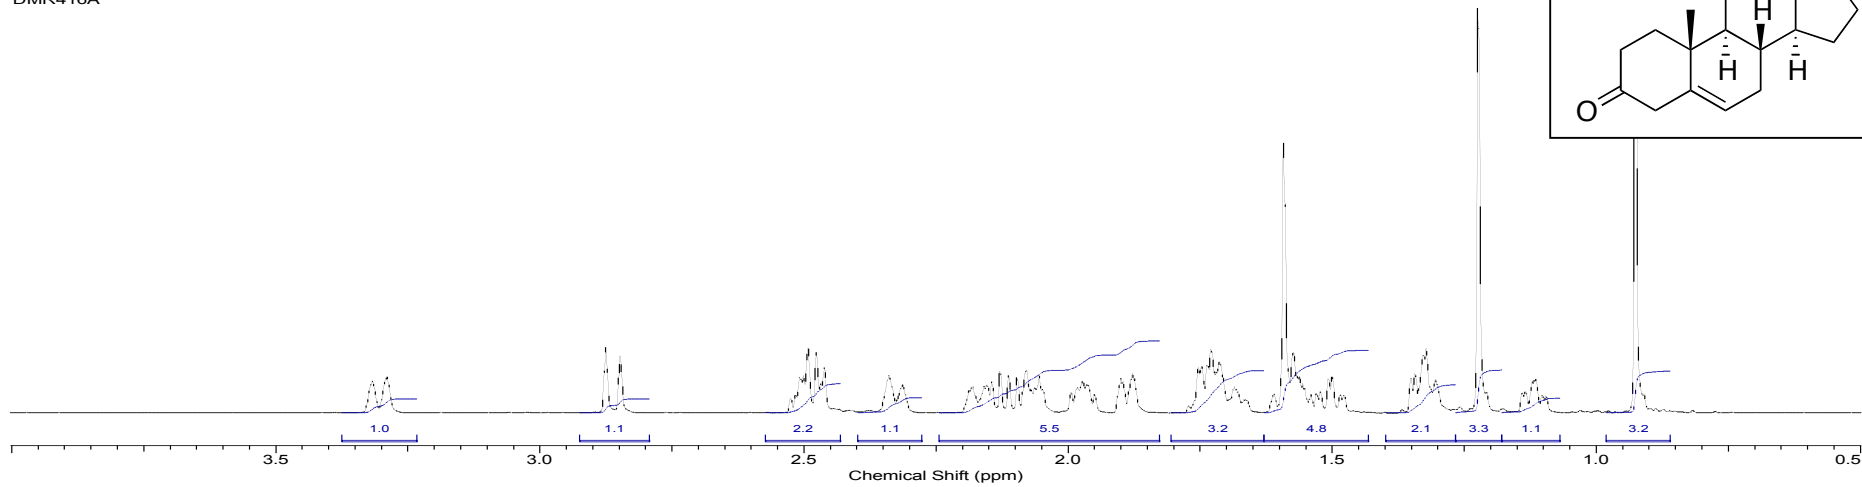

DMR416A

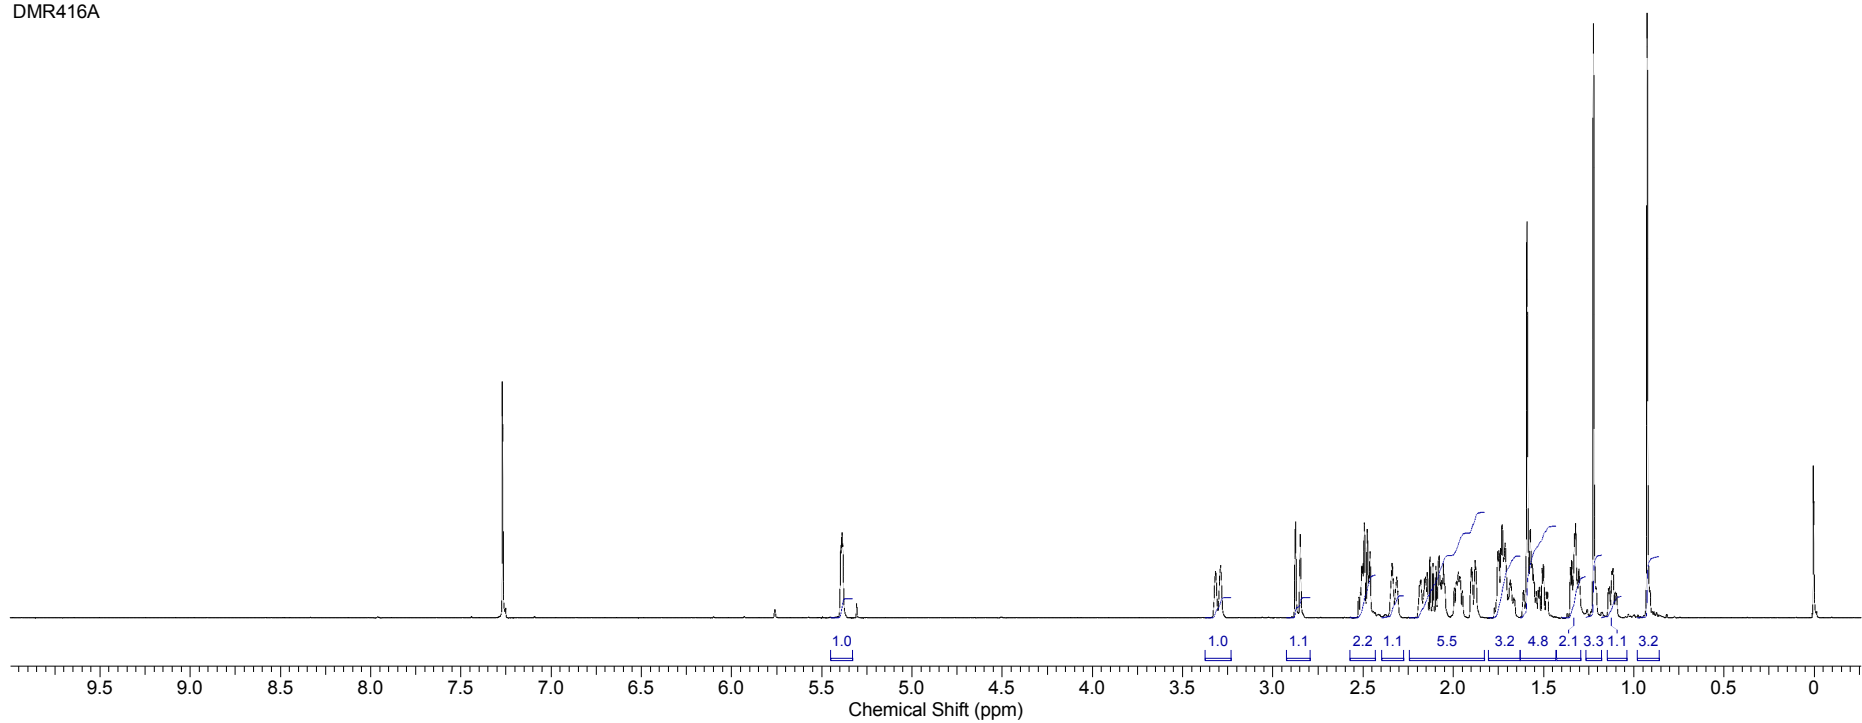

(8*R*,9*S*,10*R*,13*S*,14*S*)-10,13-dimethyl-7,8,9,10,11,12,13,14,15,16-decahydro-1*H*-cyclopenta[*a*]phenanthrene-3,17(2*H*,4*H*)-dione

Scheme 1-Int 4

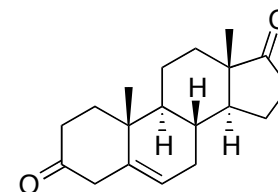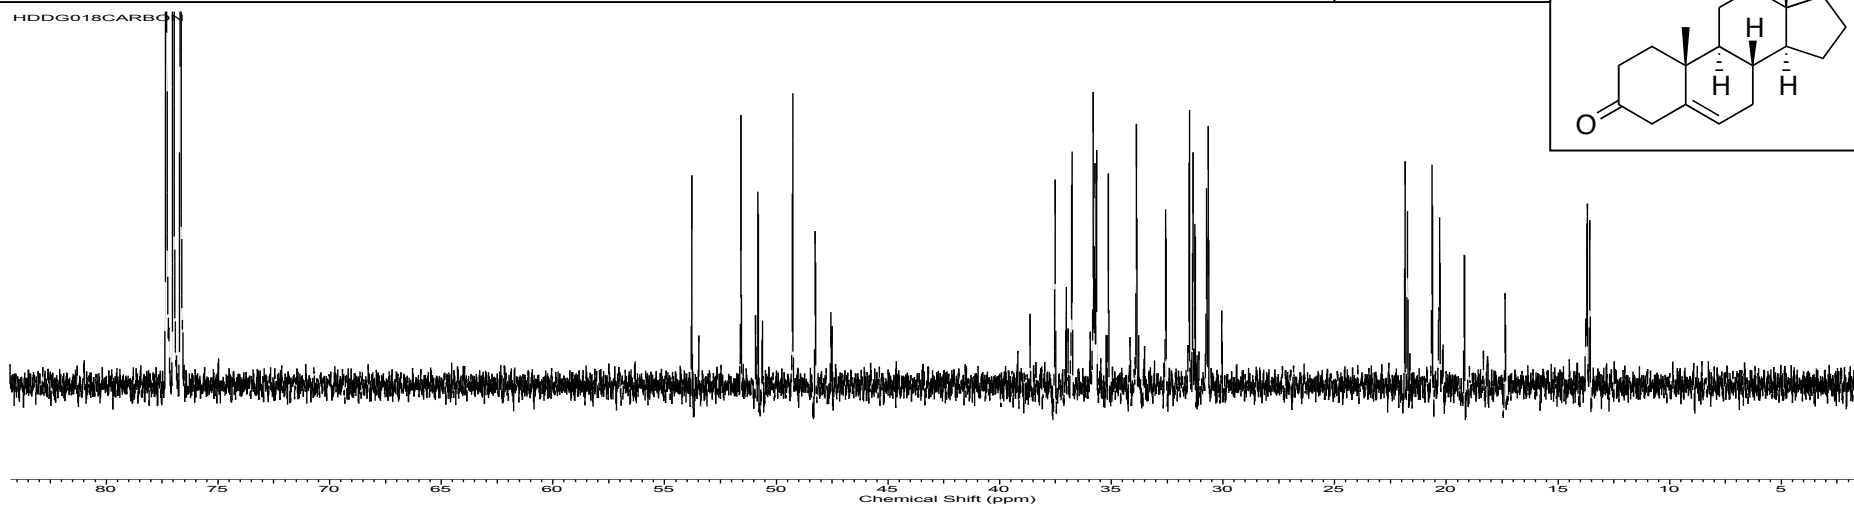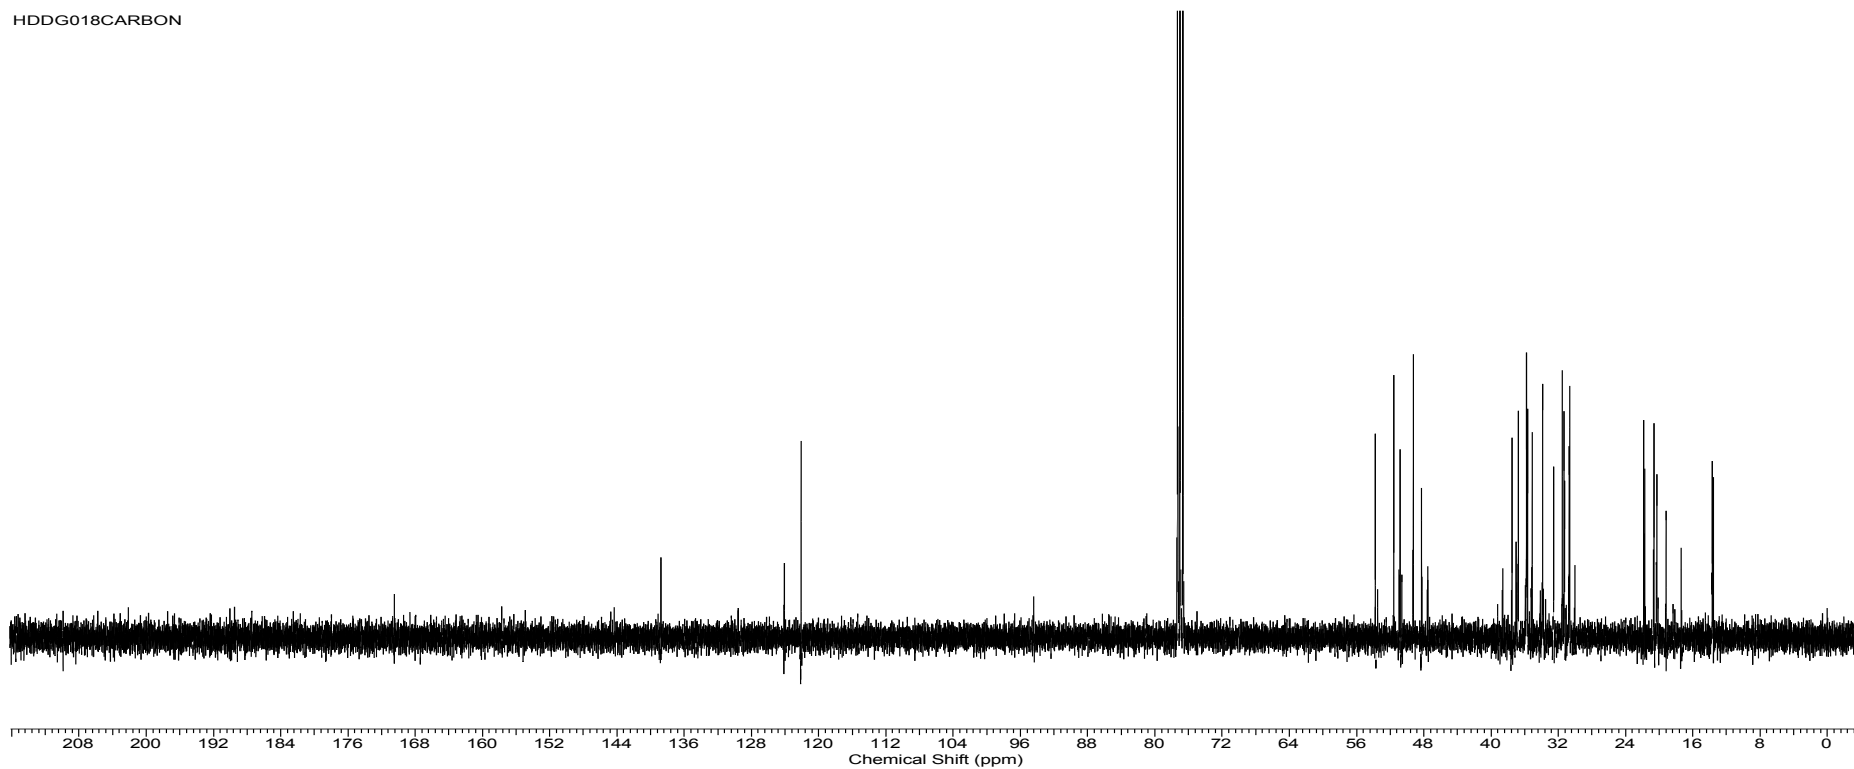

(8*R*,9*S*,10*R*,13*S*,14*S*)-4-diazo-10,13-dimethyl-7,8,9,10,11,12,13,14,15,16-decahydro-3*H*-cyclopenta[*a*]phenanthrene-3,17(4*H*)-dione

2

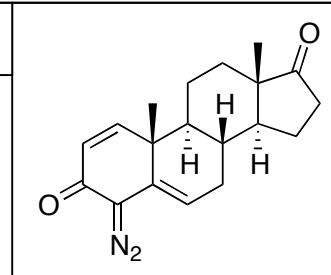

DMR659\_PROTON

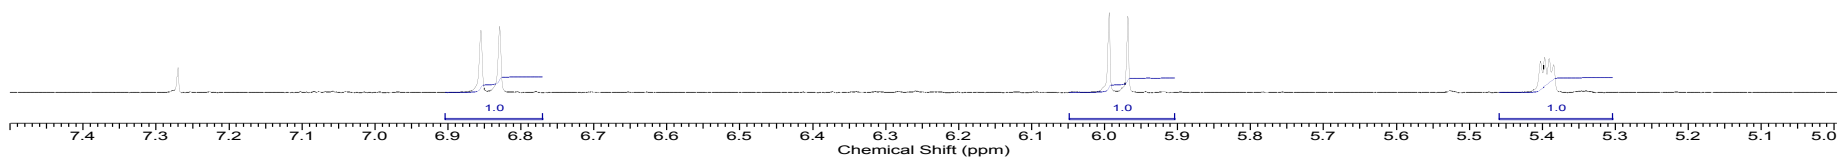

DMR659\_PROTON

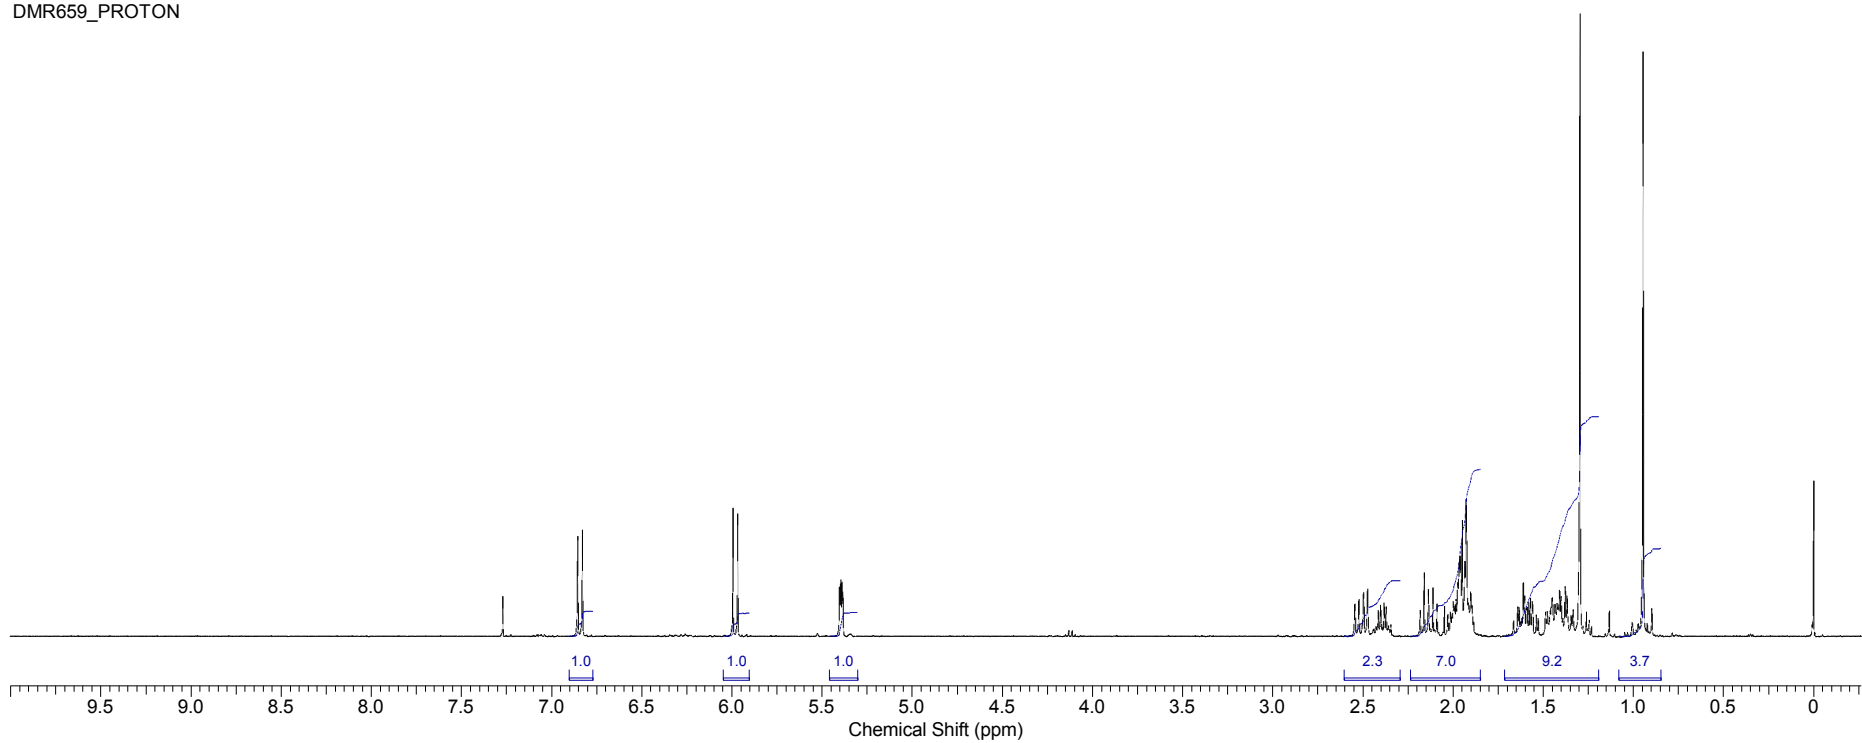

(8*R*,9*S*,10*R*,13*S*,14*S*)-4-diazo-10,13-dimethyl-7,8,9,10,11,12,13,14,15,16-decahydro-3*H*-cyclopenta[*a*]phenanthrene-3,17(4*H*)-dione

2

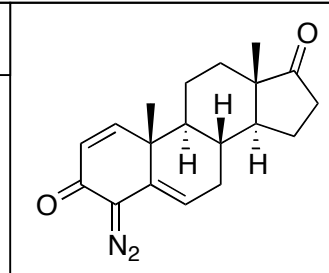

DMR659\_CARBON

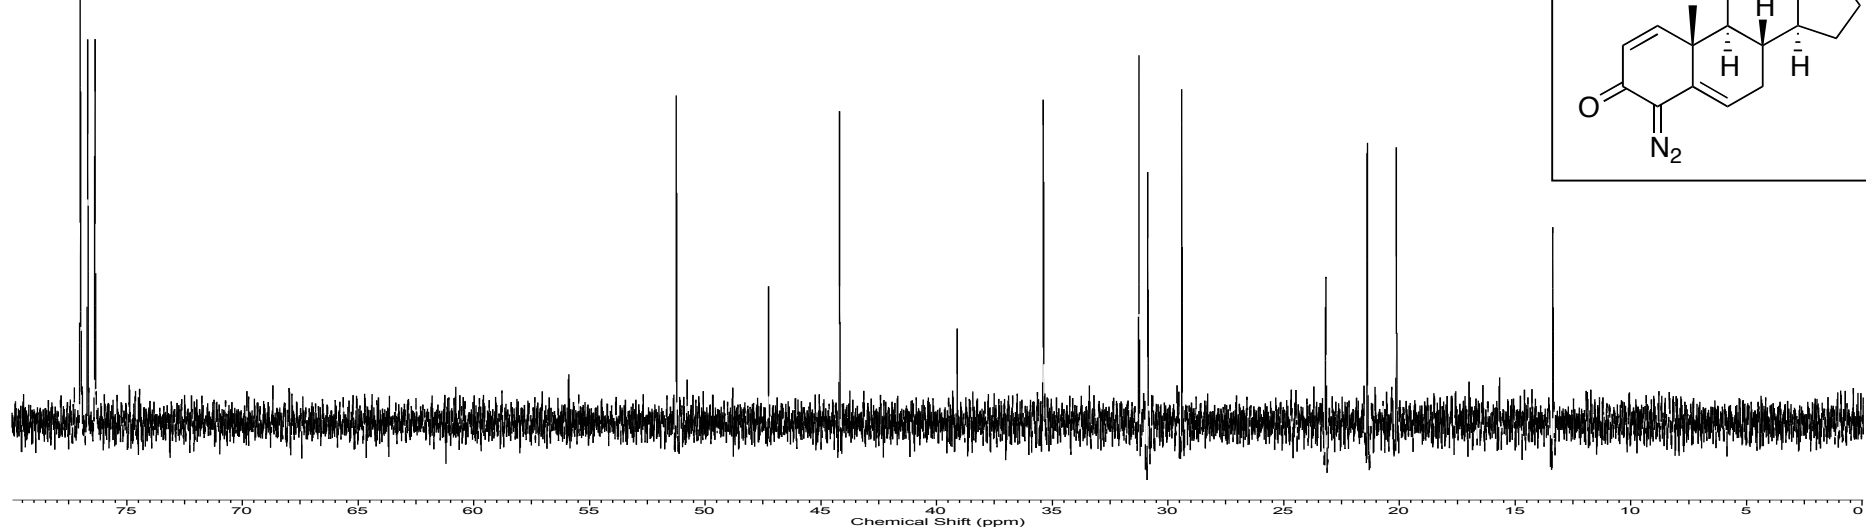

DMR659\_CARBON

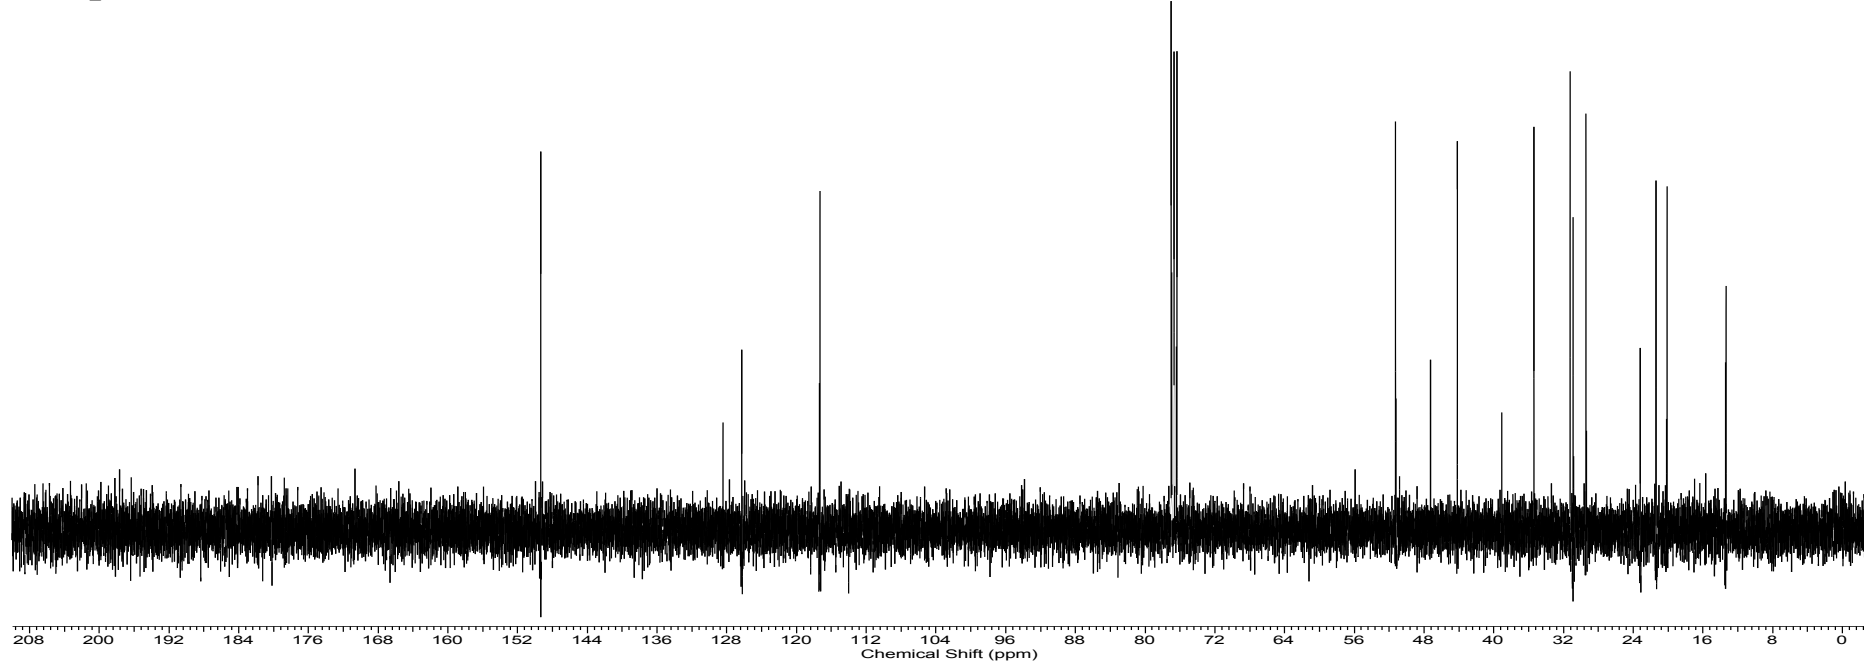

(8*R*,9*S*,10*R*,13*S*,14*S*)-4-ethoxy-3-hydroxy-10,13-dimethyl-9,10,11,12,13,14,15,16-octahydro-7*H*-cyclopenta[ $\alpha$ ]phenanthren-17(8*H*)-one

**5a**

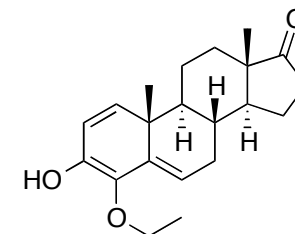

HDDG007\_PROTON

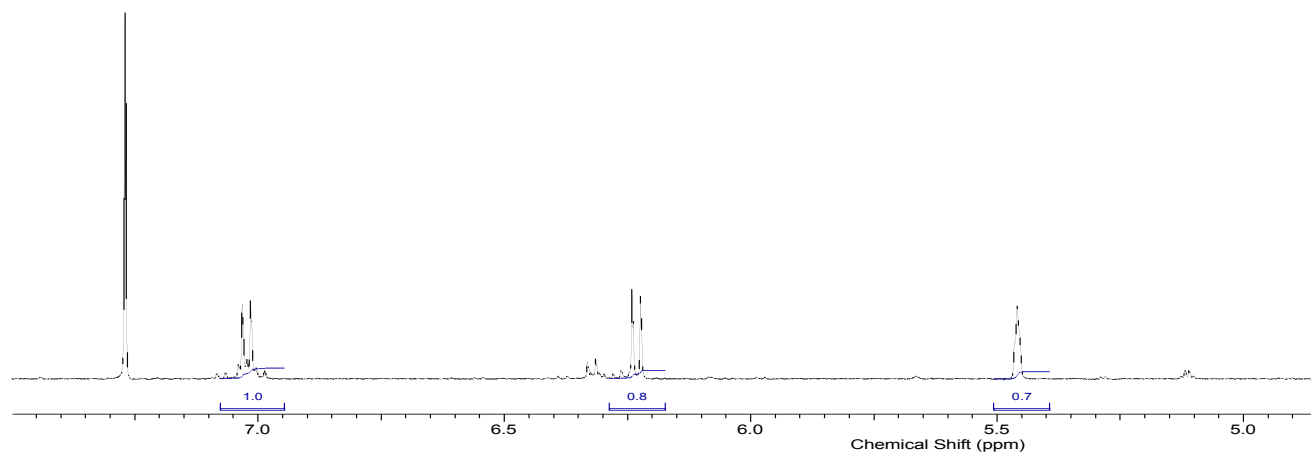

HDDG007\_PROTON

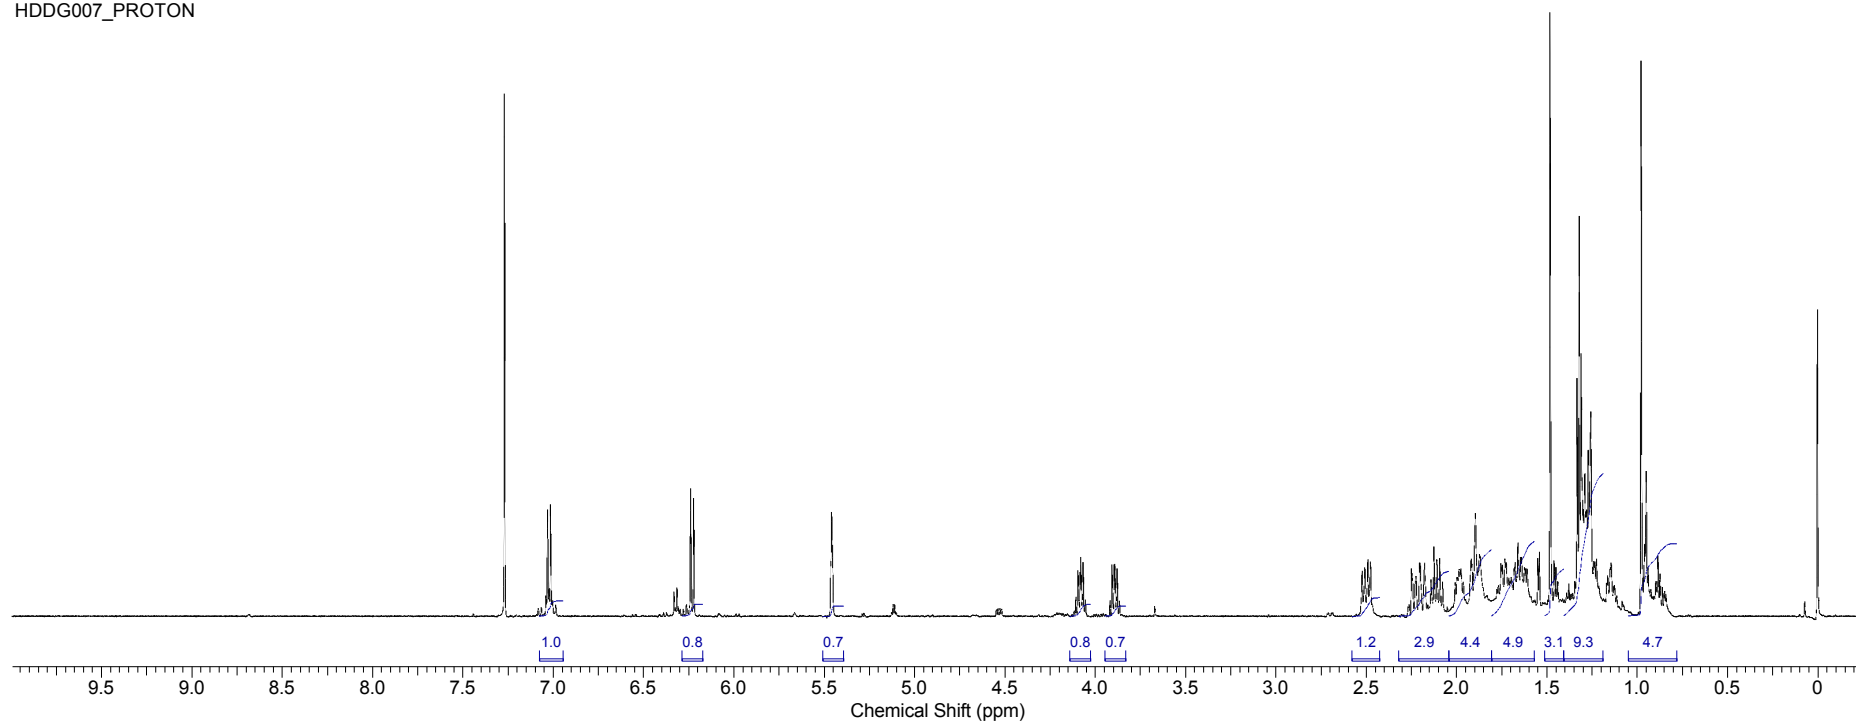

(8*R*,9*S*,10*R*,13*S*,14*S*)-4-ethoxy-3-hydroxy-10,13-dimethyl-9,10,11,12,13,14,15,16-octahydro-7*H*-cyclopenta[ $\alpha$ ]phenanthren-17(8*H*)-one

5a



HDDG007\_CARBON\_I

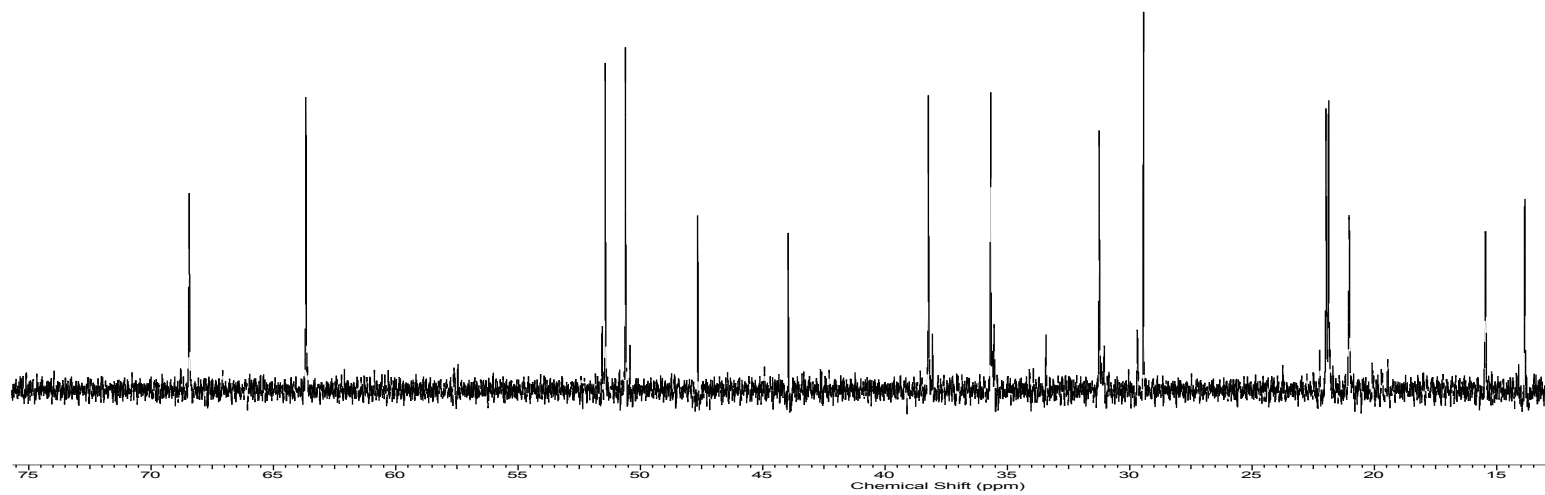

HDDG007\_CARBON\_II

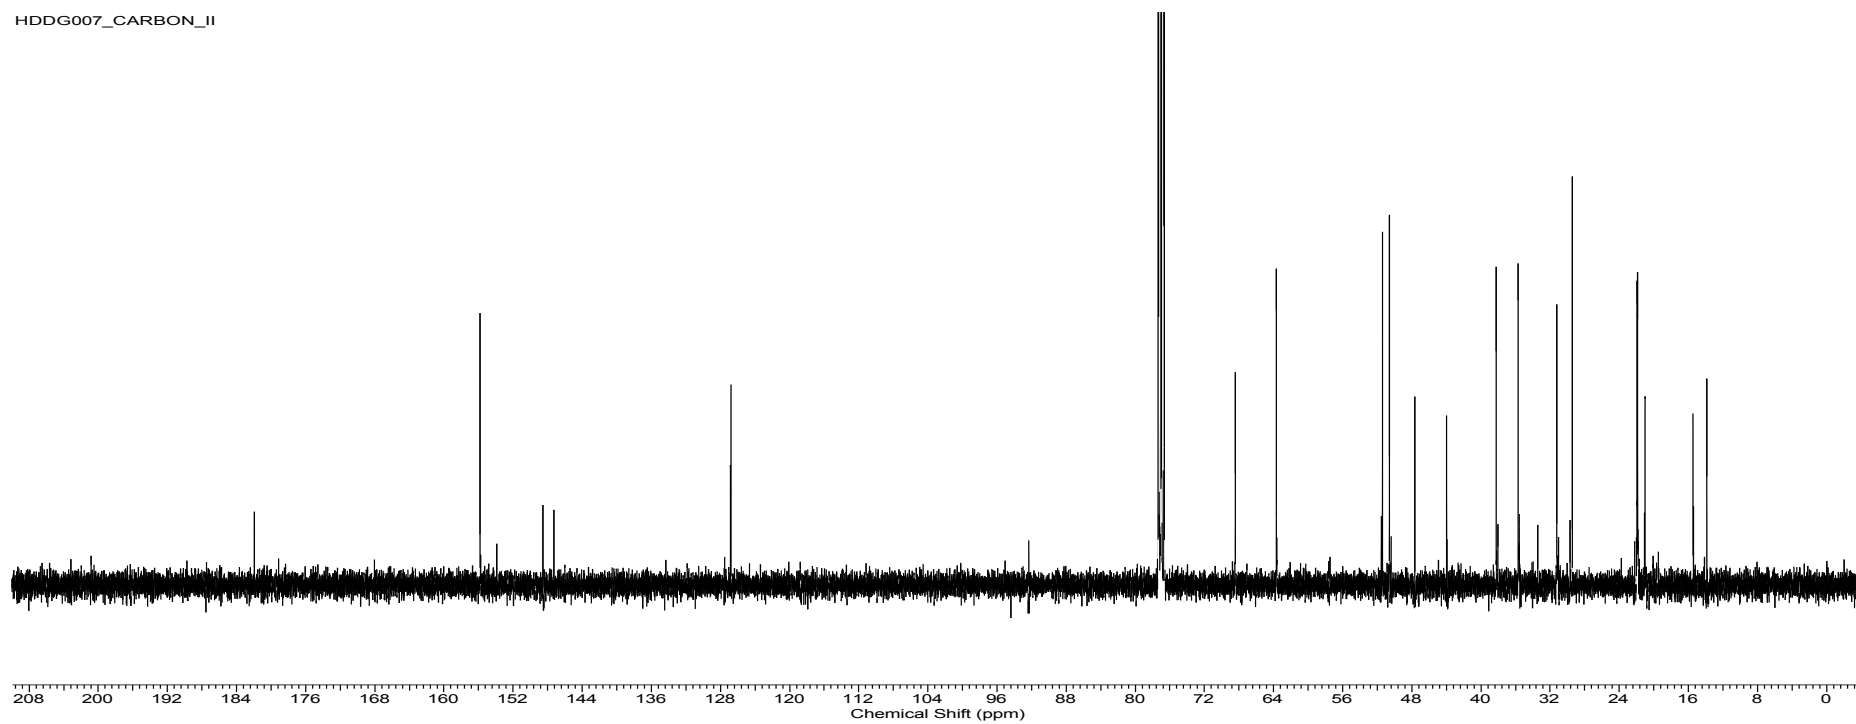



(8*R*,9*S*,10*R*,13*S*,14*S*)-3-hydroxy-4-methoxy-10,13-dimethyl-9,10,11,12,13,14,15,16-octahydro-7*H*-cyclopenta[ $\alpha$ ]phenanthren-17(8*H*)-one

**5b**

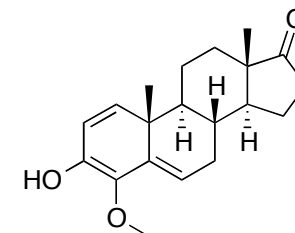

DMR399LONG

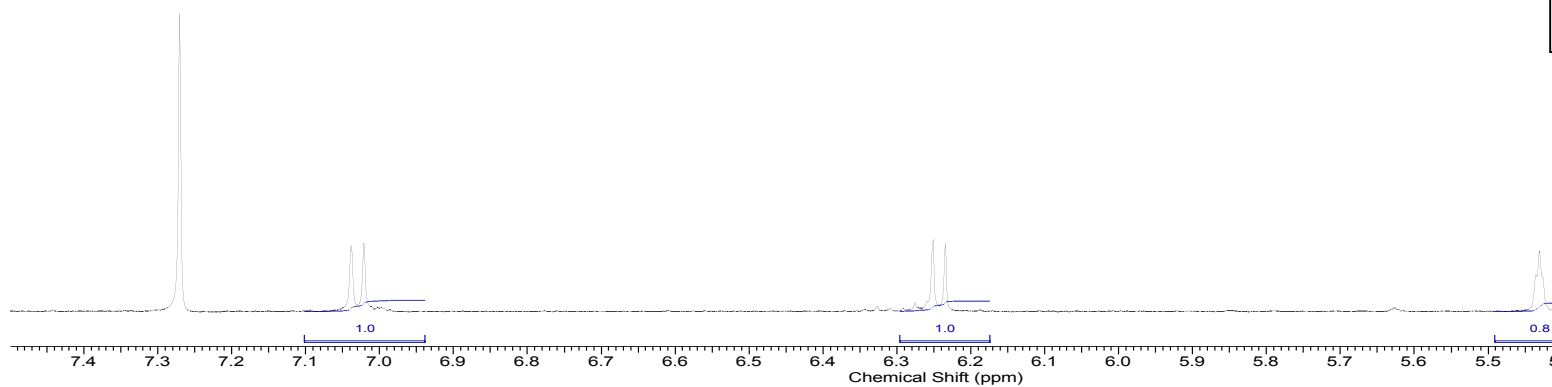

DMR399LONG

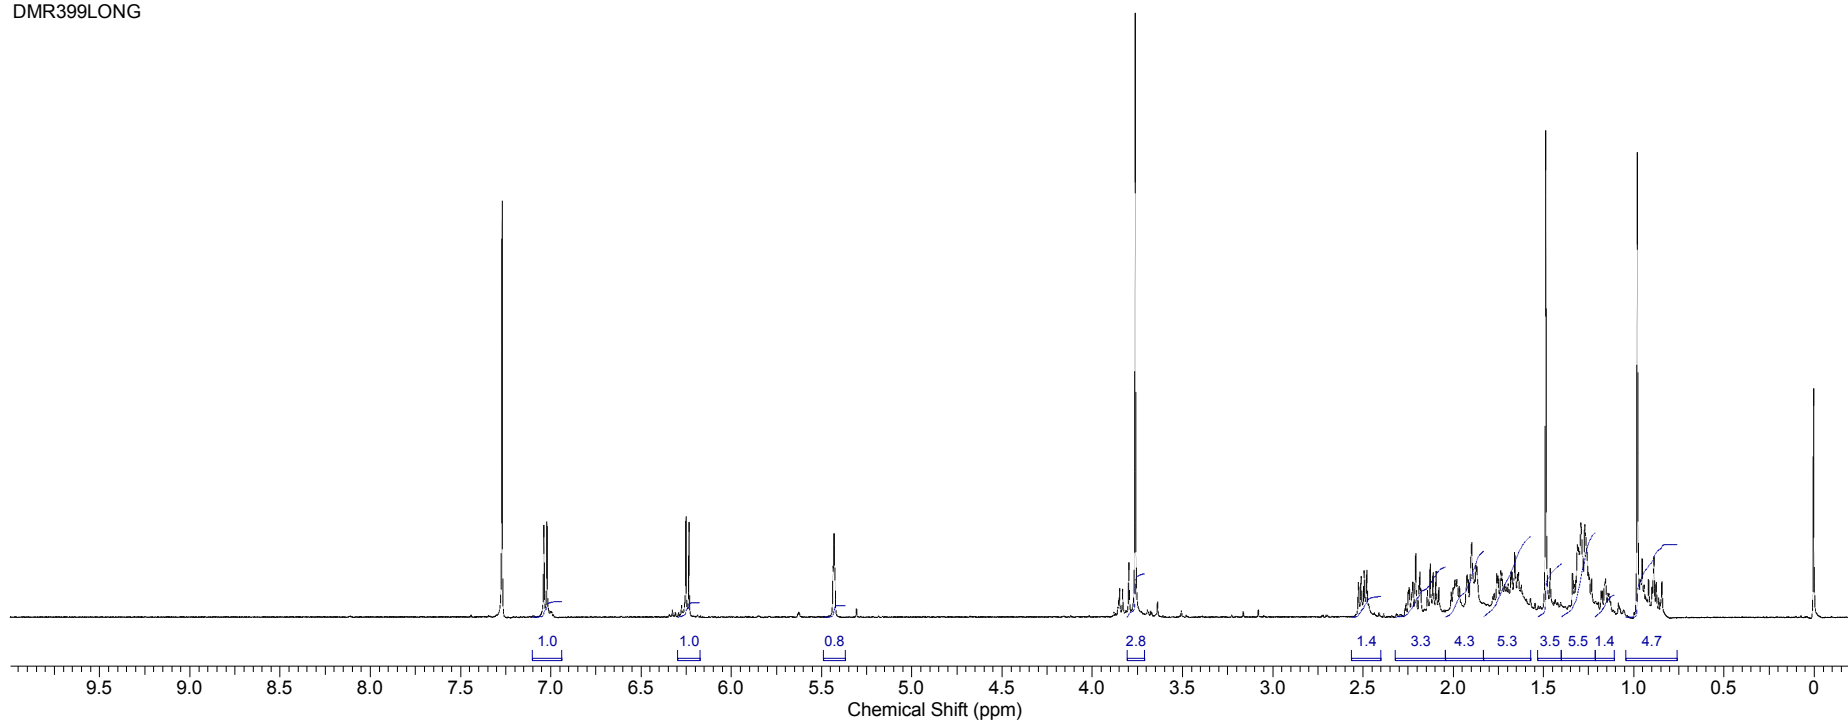

(8*R*,9*S*,10*R*,13*S*,14*S*)-3-hydroxy-4-methoxy-10,13-dimethyl-9,10,11,12,13,14,15,16-octahydro-7*H*-cyclopenta[ $\alpha$ ]phenanthren-17(8*H*)-one

**5b**

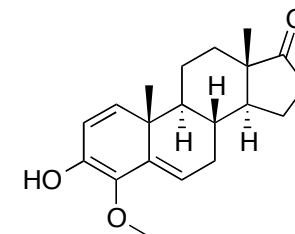

DMR399CARBON

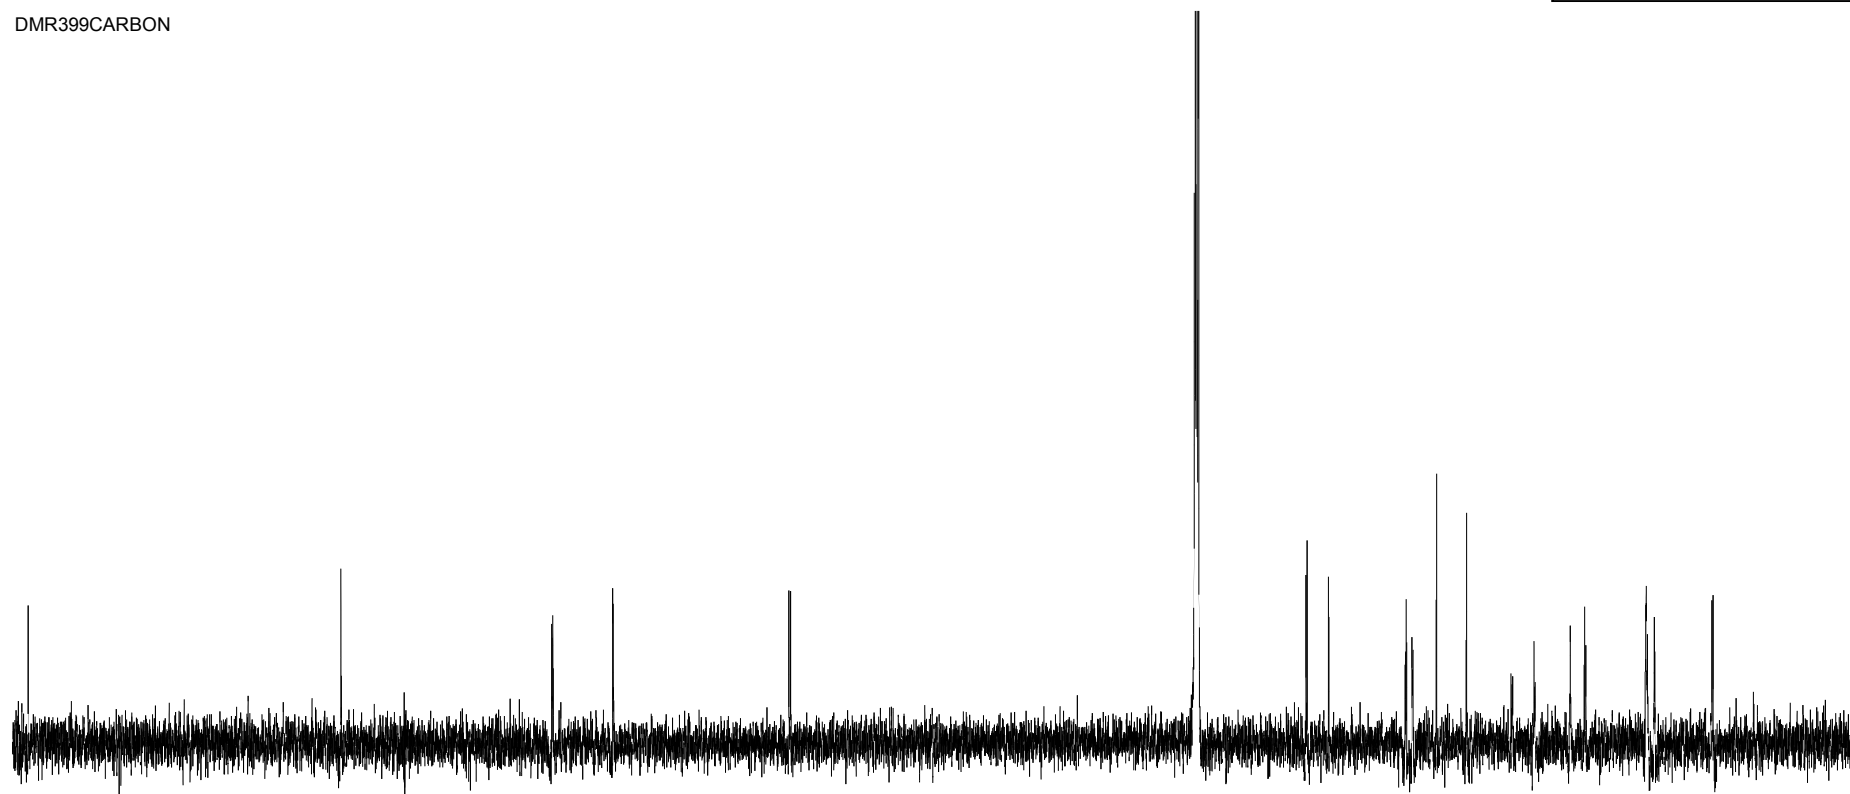

216 208 200 192 184 176 168 160 152 144 136 128 120 112 104 96 88 80 72 64 56 48 40 32 24 16 8 0  
Chemical Shift (ppm)

(8*R*,9*S*,10*R*,13*S*,14*S*)-4-(benzyloxy)-3-hydroxy-10,13-dimethyl-9,10,11,12,13,14,15,16-octahydro-7*H*-cyclopenta[*a*]phenanthren-17(8*H*)-one

**5c**

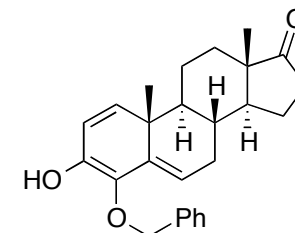

DMR584\_LONG

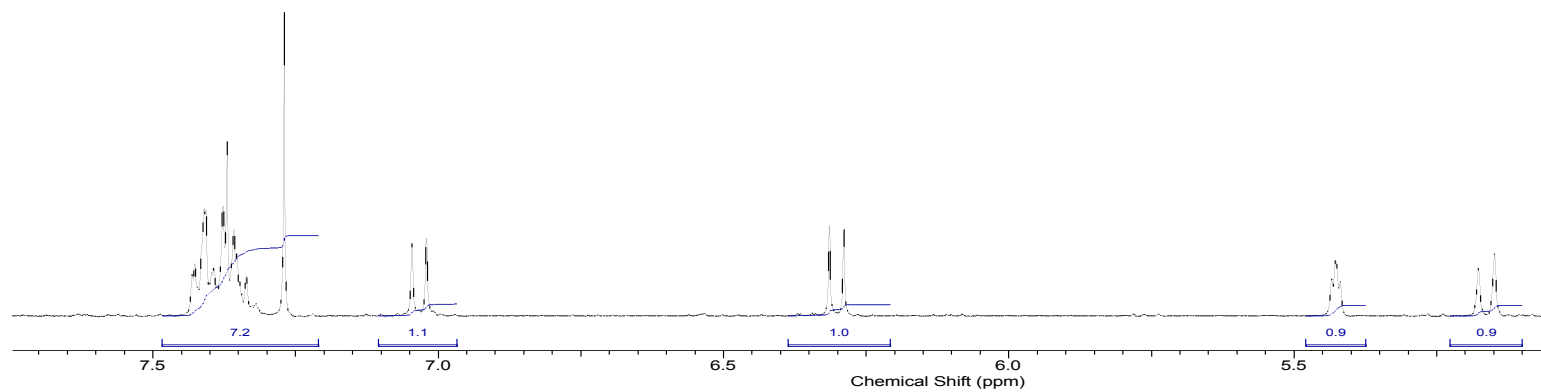

DMR584\_LONG

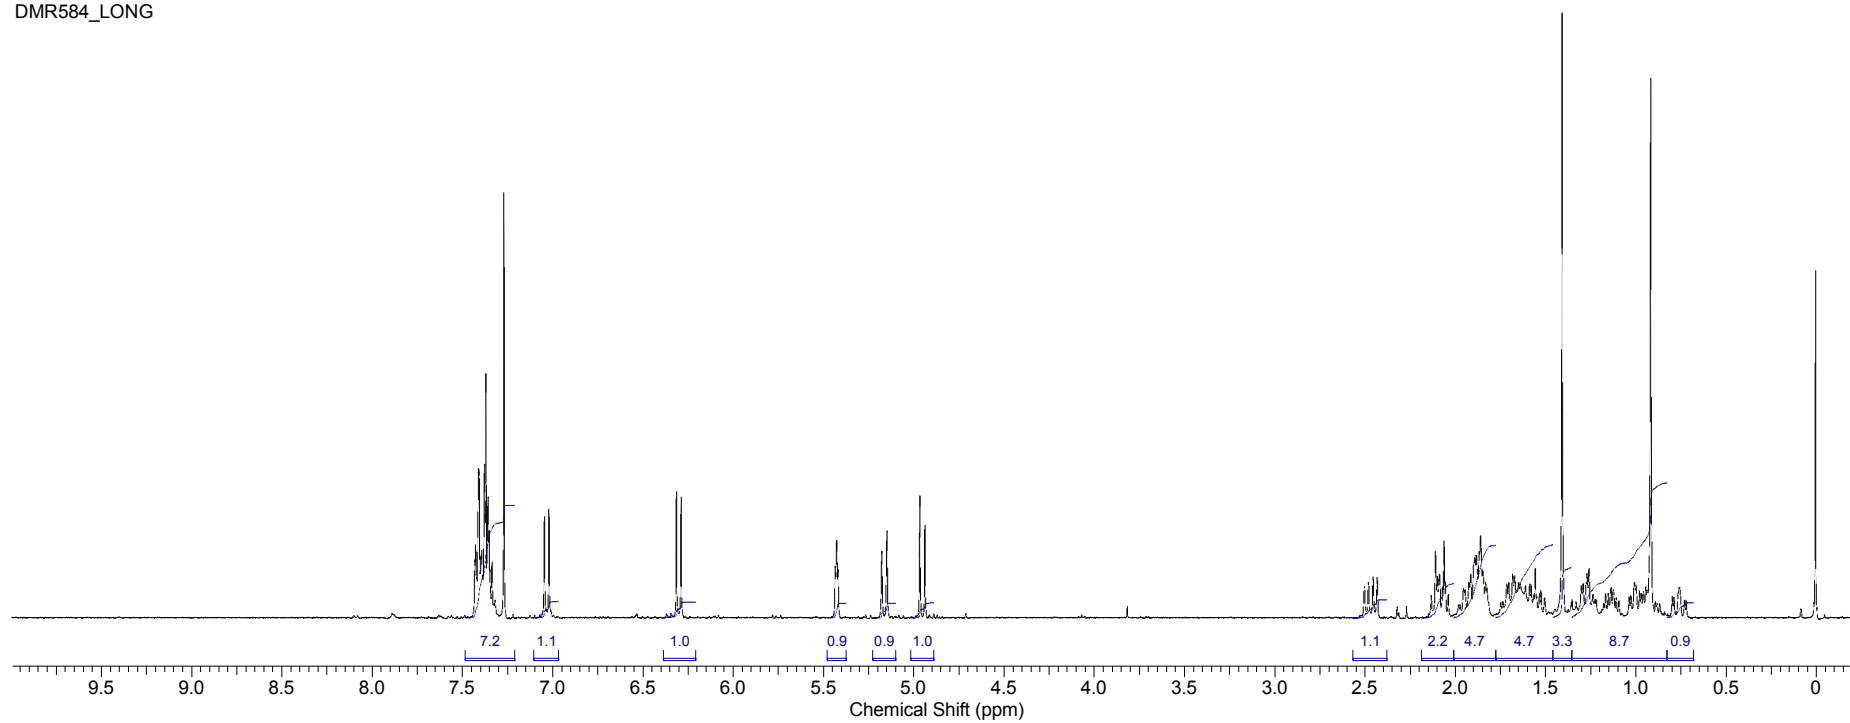

(8*R*,9*S*,10*R*,13*S*,14*S*)-4-(benzyloxy)-3-hydroxy-10,13-dimethyl-9,10,11,12,13,14,15,16-octahydro-7*H*-cyclopenta[*a*]phenanthren-17(8*H*)-one

**5c**

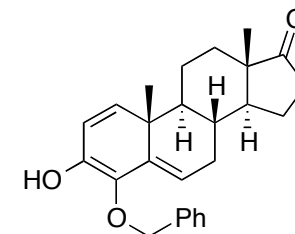

DMR584CARBON

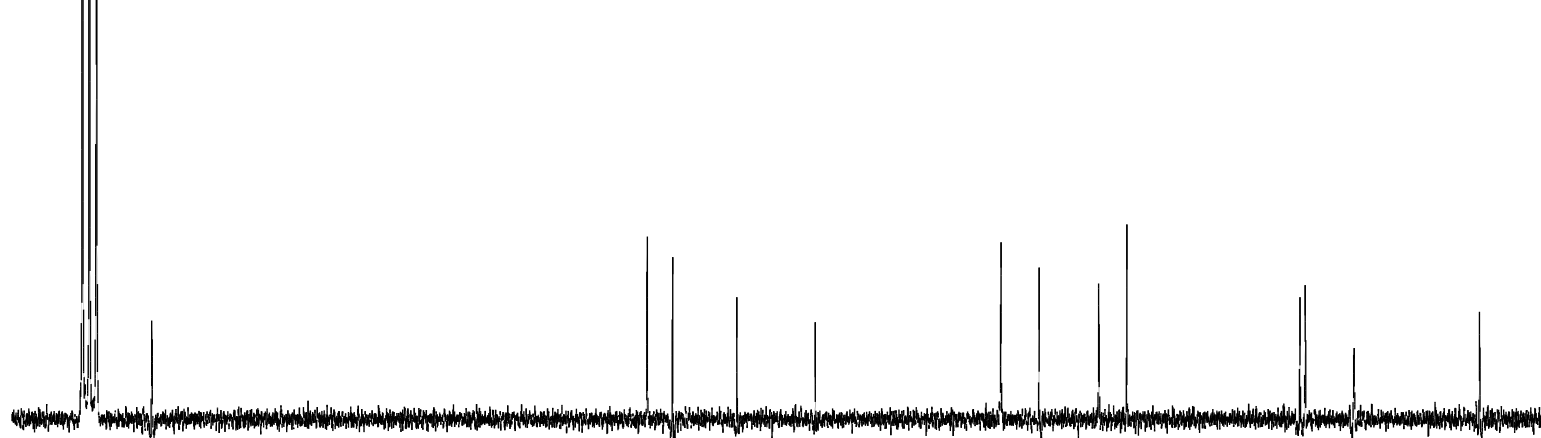

Chemical Shift (ppm)

DMR584CARBON

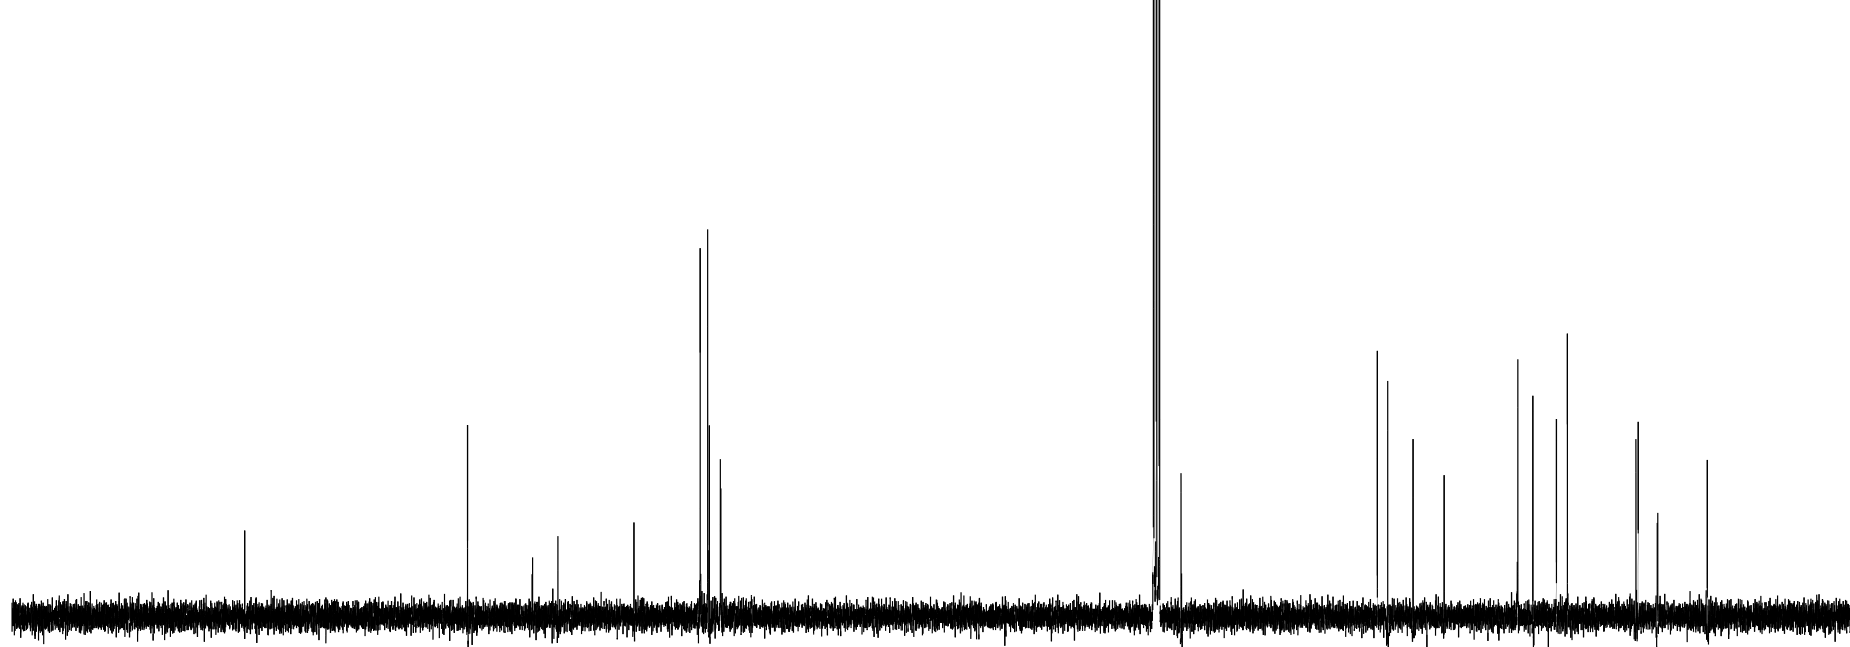

Chemical Shift (ppm)

(8*R*,9*S*,10*R*,13*S*,14*S*)-3-hydroxy-10,13-dimethyl-17-oxo-8,9,10,11,12,13,14,15,16,17-decahydro-7*H*-cyclopenta[ $\alpha$ ]phenanthren-4-yl acetate

**5d**

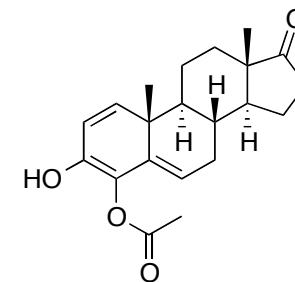

DMR450\_II

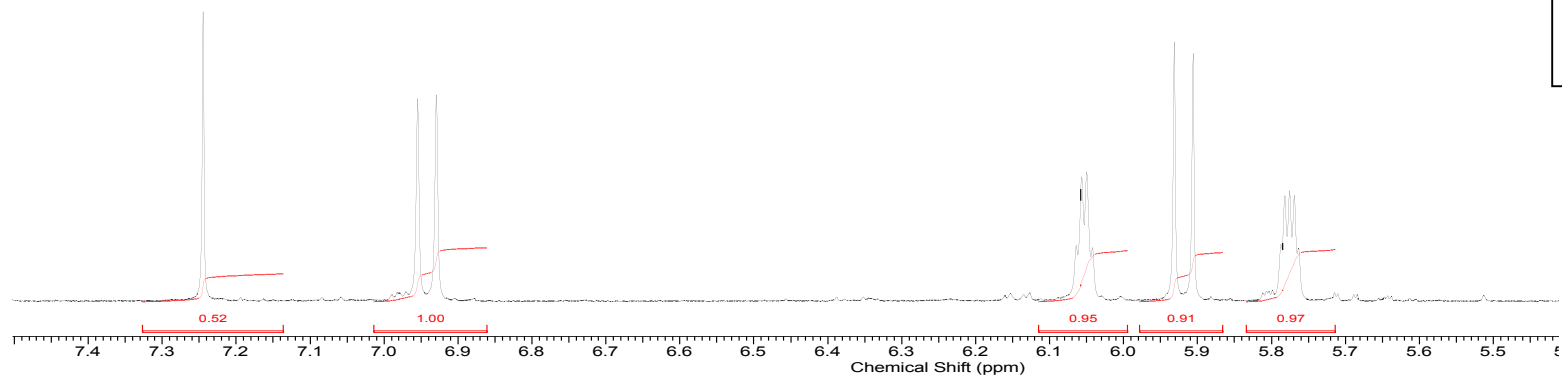

DMR450\_II

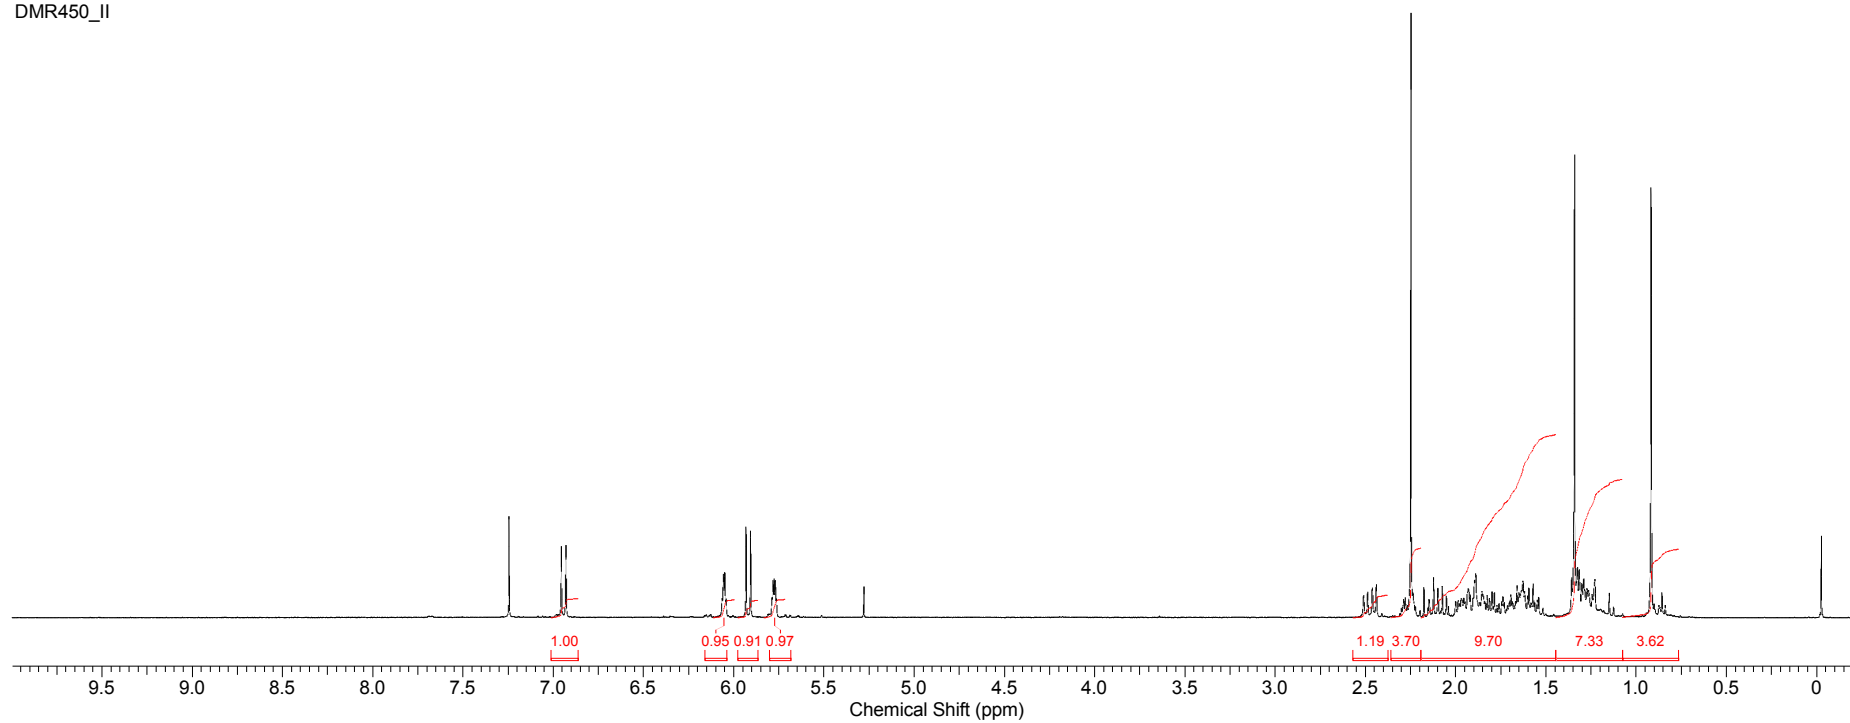

(8*R*,9*S*,10*R*,13*S*,14*S*)-3-hydroxy-10,13-dimethyl-17-oxo-8,9,10,11,12,13,14,15,16,17-decahydro-7*H*-cyclopenta[ $\alpha$ ]phenanthren-4-yl acetate

**5d**

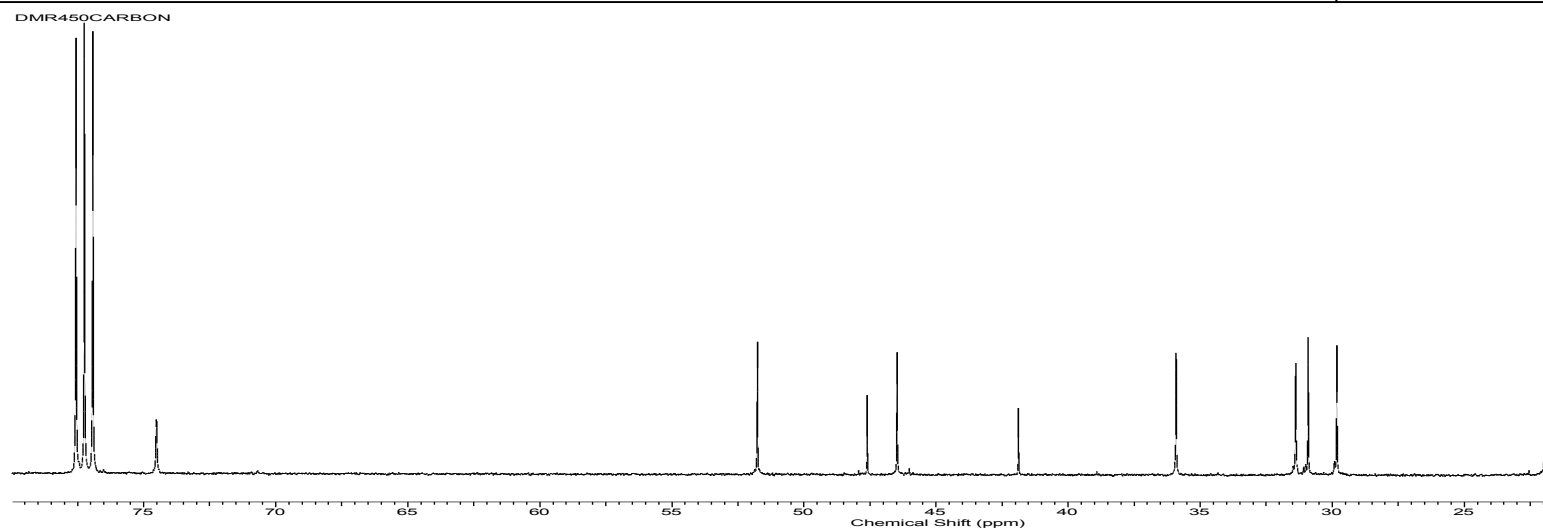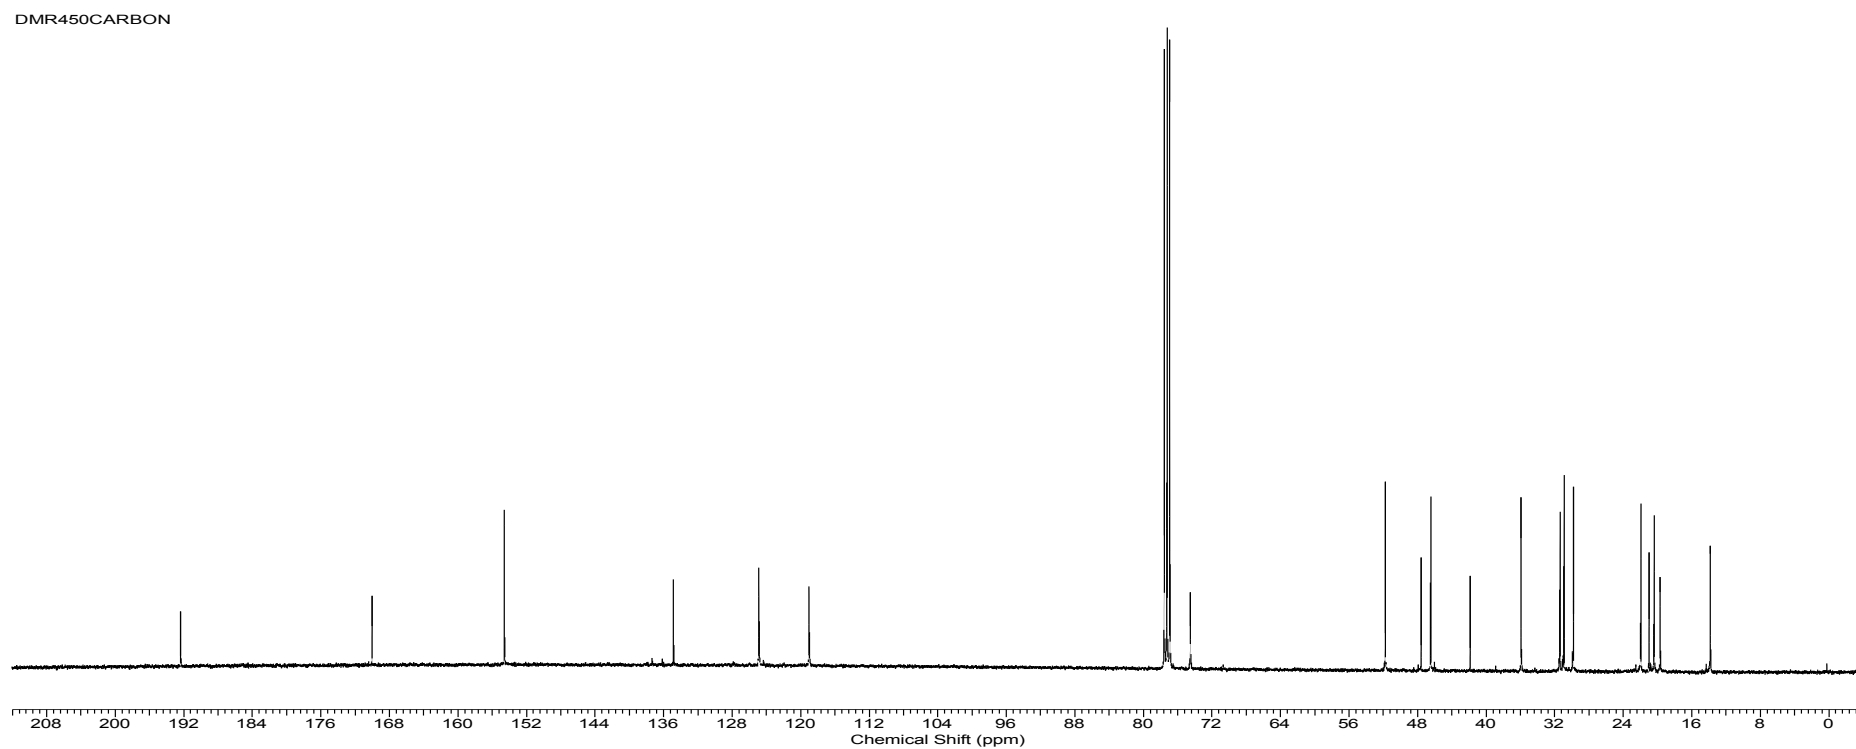

(8*R*,9*S*,10*R*,13*S*,14*S*)-3-hydroxy-10,13-dimethyl-17-oxo-8,9,10,11,12,13,14,15,16,17-decahydro-7*H*-cyclopenta[ $\alpha$ ]phenanthren-4-yl propionate

5e

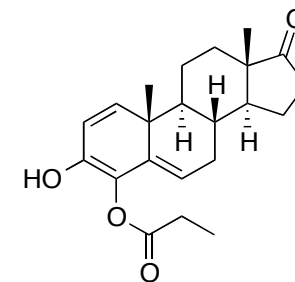

DMR292\_LONG

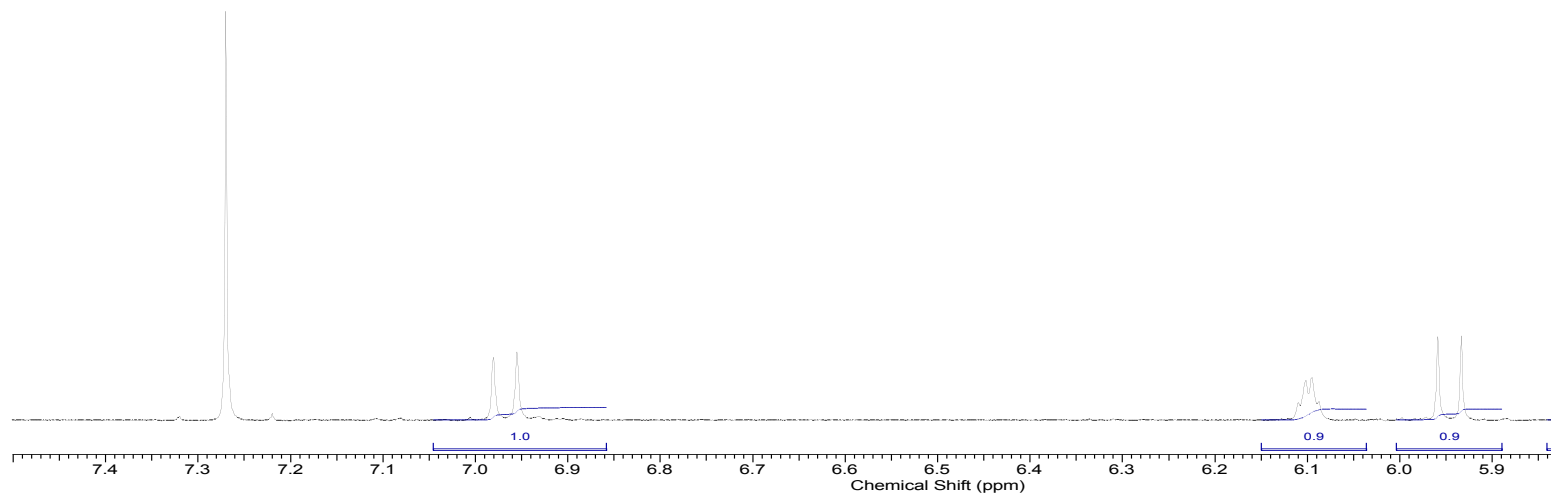

DMR292\_LONG

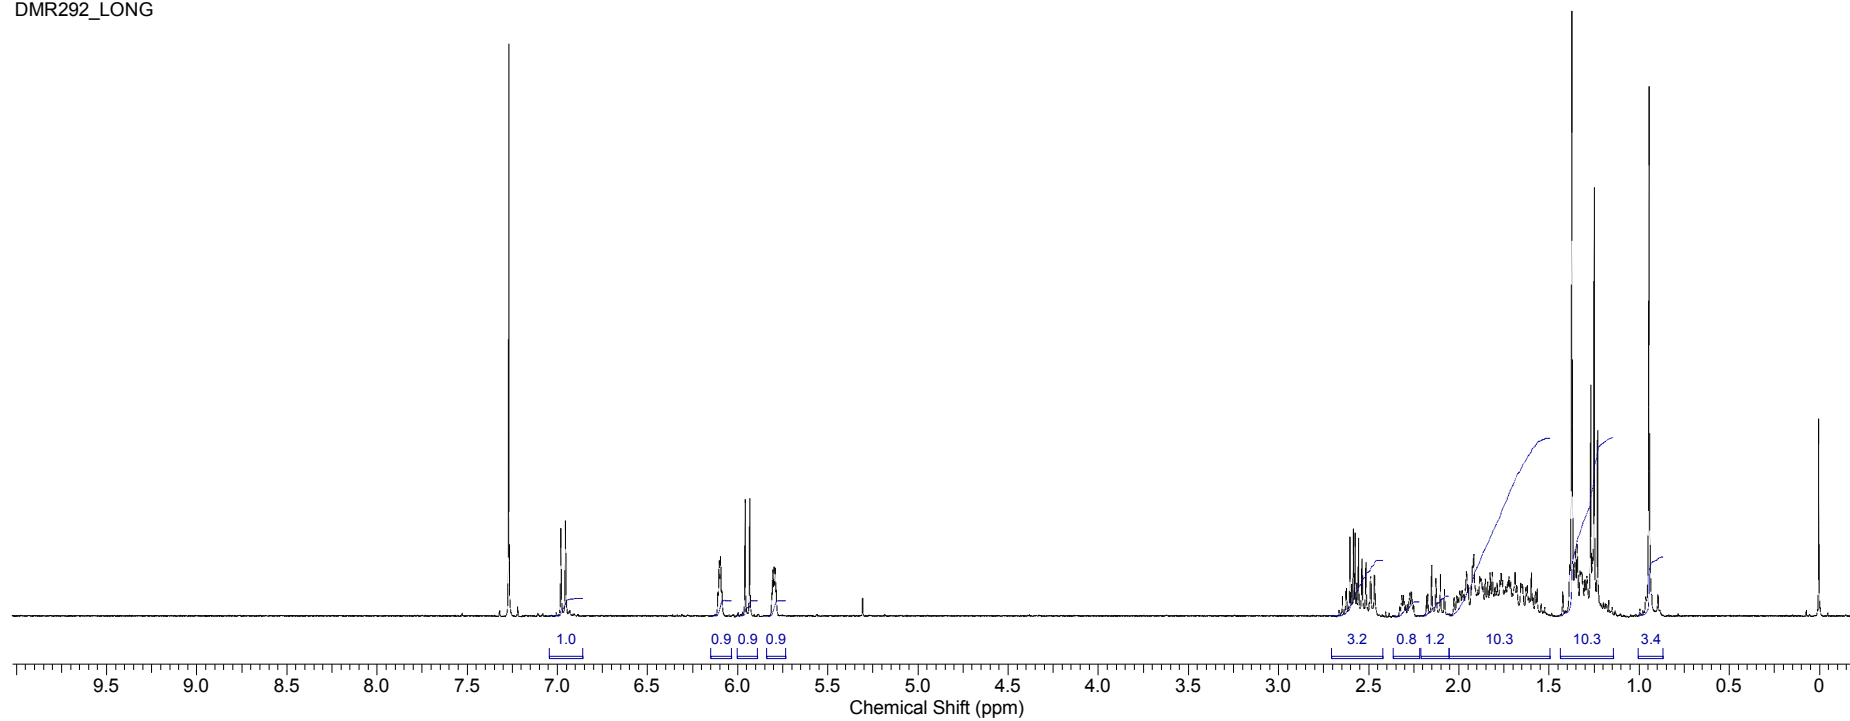

(8*R*,9*S*,10*R*,13*S*,14*S*)-3-hydroxy-10,13-dimethyl-17-oxo-8,9,10,11,12,13,14,15,16,17-decahydro-7*H*-cyclopenta[*a*]phenanthren-4-yl propionate

5e

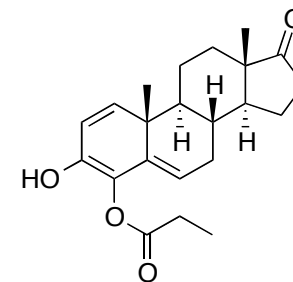

DMR292\_CARBON

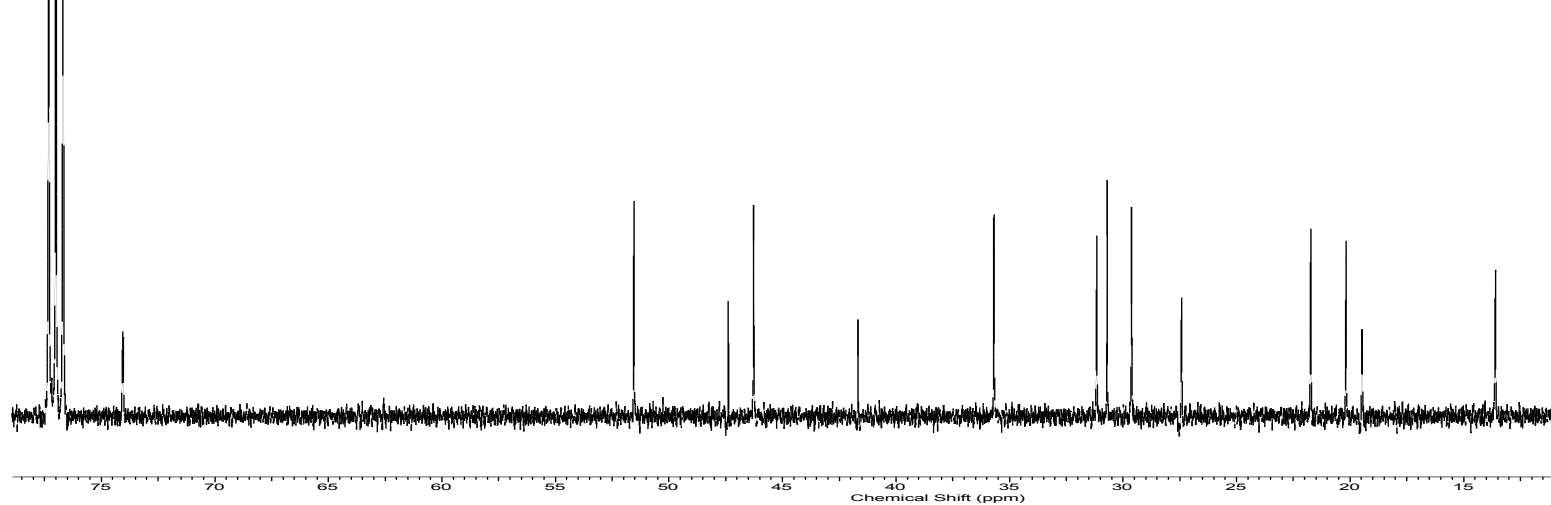

DMR292\_CARBON

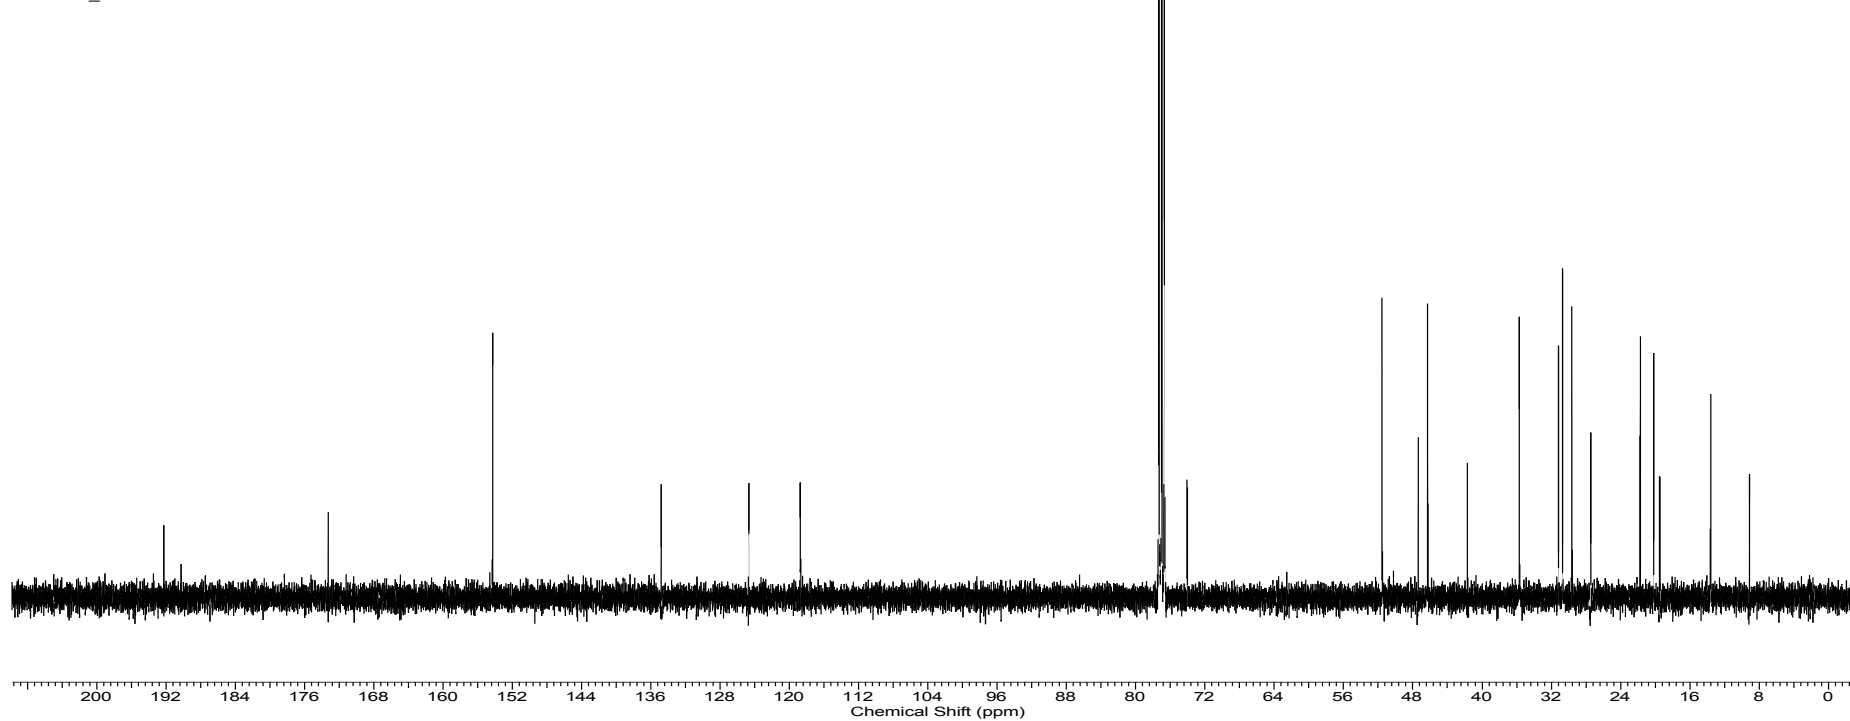



(8*R*,9*S*,10*R*,13*S*,14*S*)-3-hydroxy-10,13-dimethyl-17-oxo-8,9,10,11,12,13,14,15,16,17-decahydro-7*H*-cyclopenta[ $\alpha$ ]phenanthren-4-yl 2-phenylacetate

5f

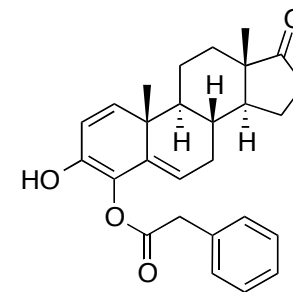

HDDG019LONG

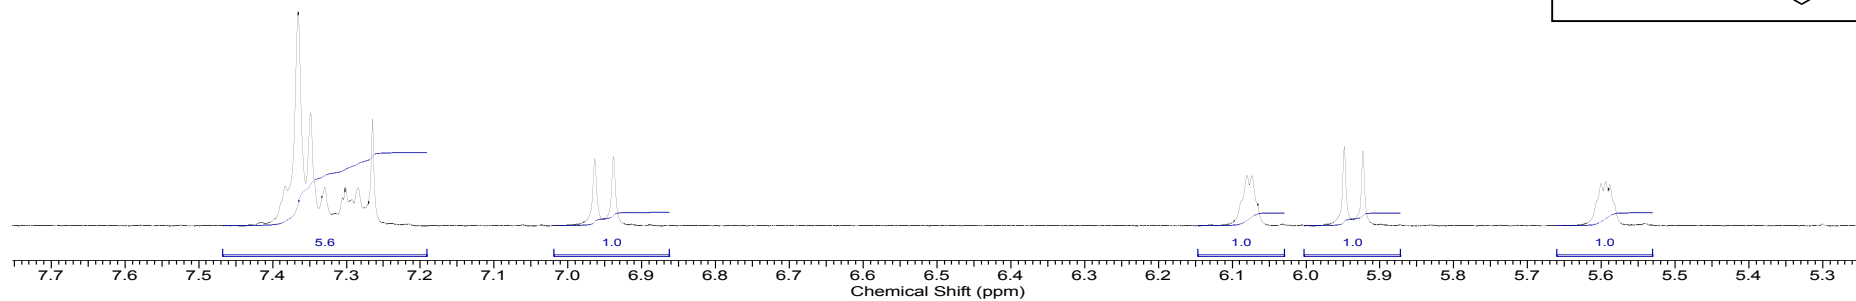

HDDG019LONG

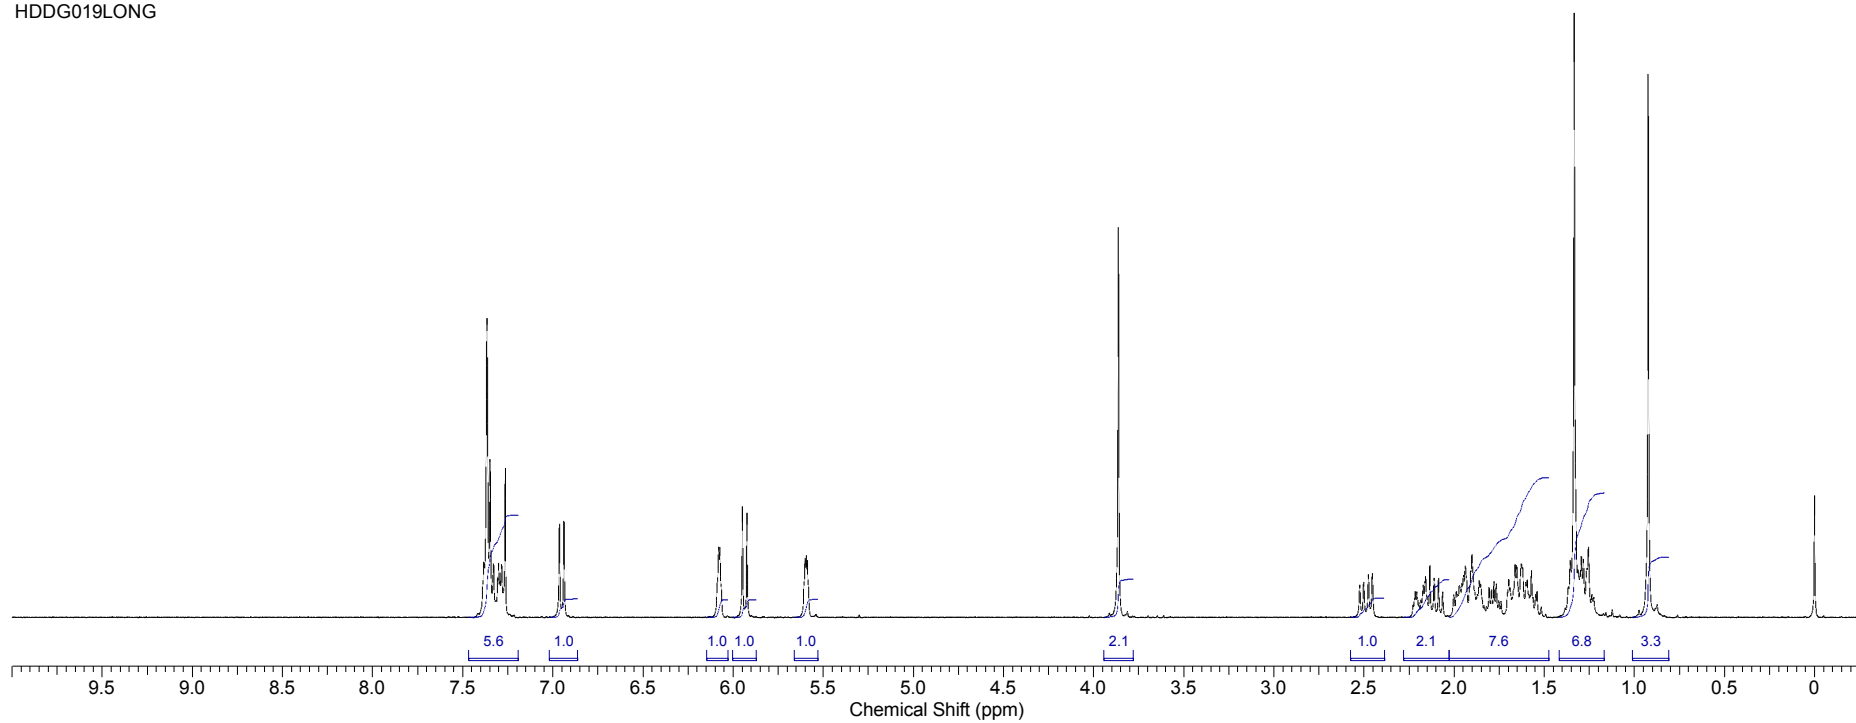

(8*R*,9*S*,10*R*,13*S*,14*S*)-3-hydroxy-10,13-dimethyl-17-oxo-8,9,10,11,12,13,14,15,16,17-decahydro-7*H*-cyclopenta[ $\alpha$ ]phenanthren-4-yl 2-phenylacetate

5f

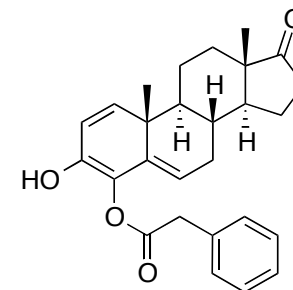

HDDG019CARBON

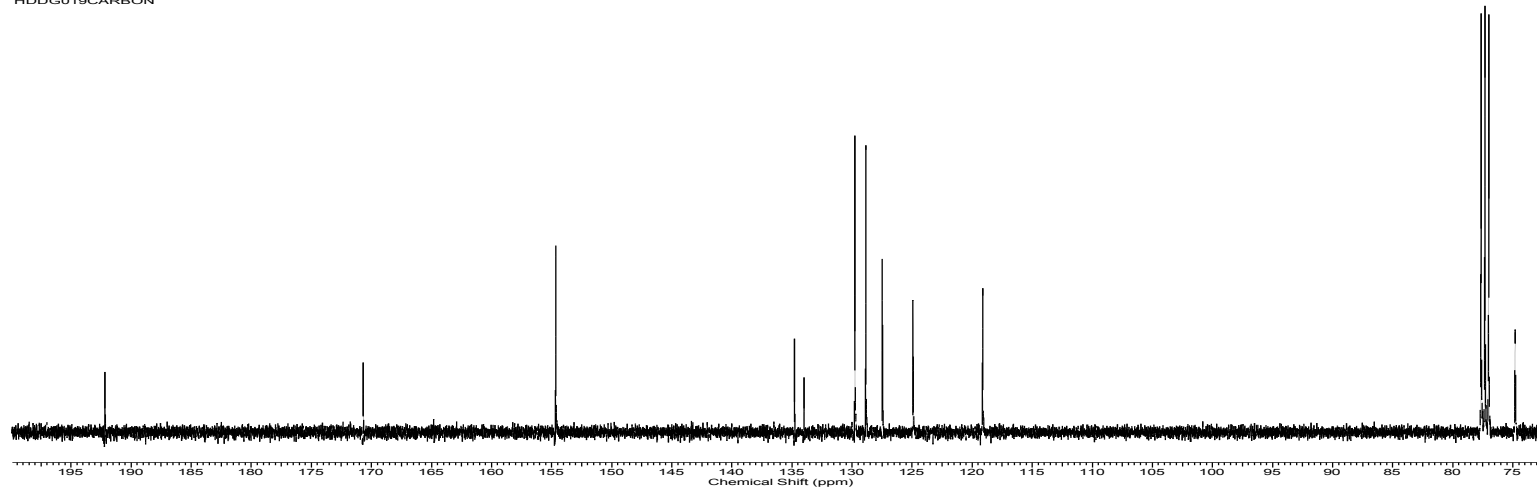

HDDG019CARBON

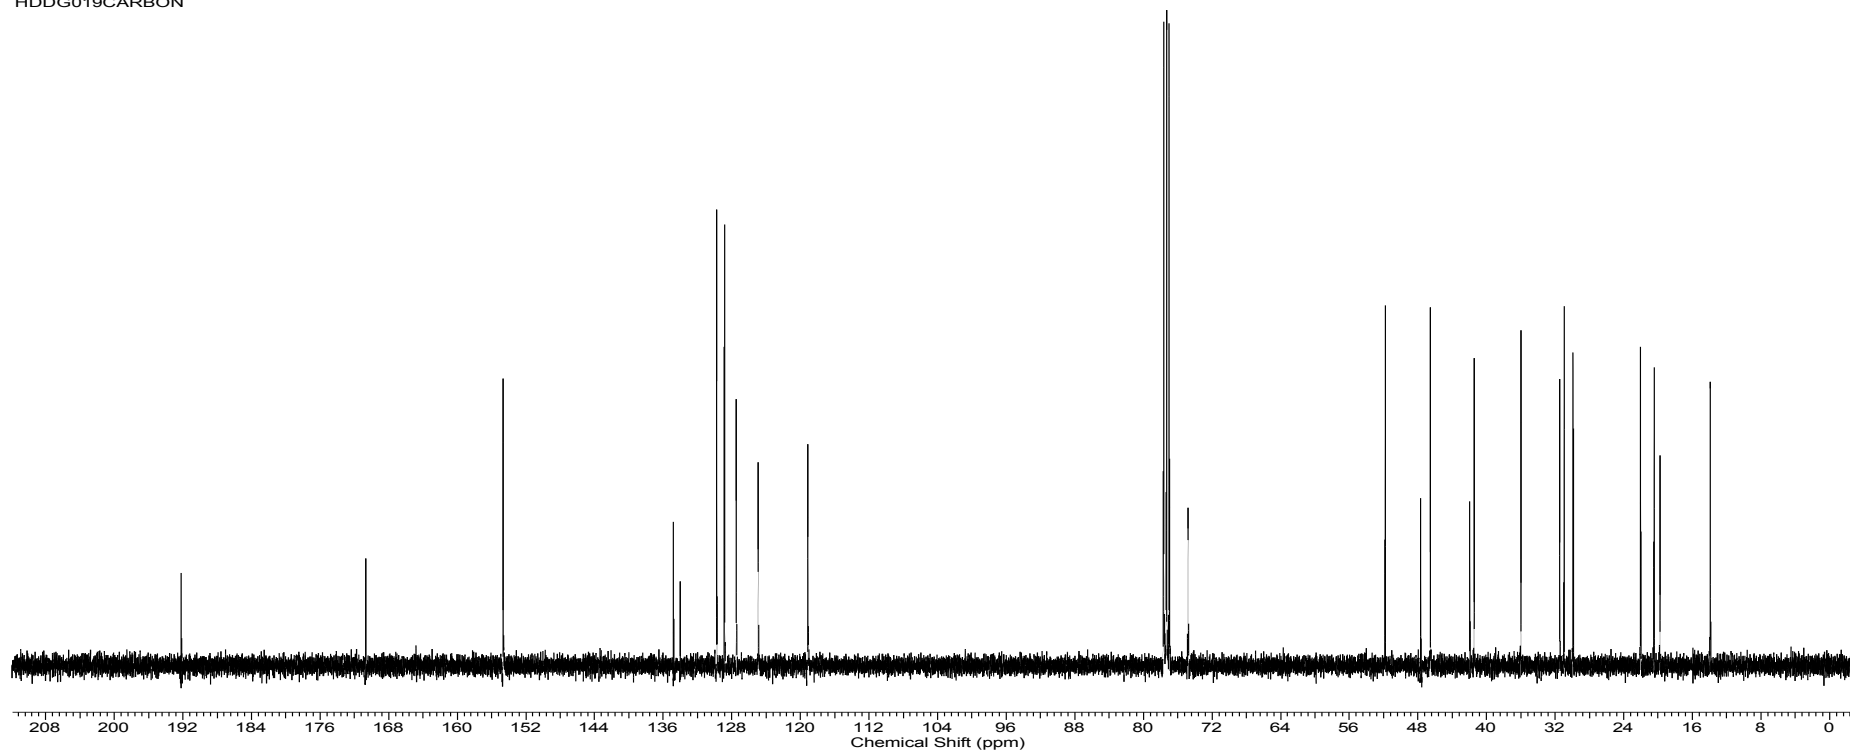

(8*R*,9*S*,10*R*,13*S*,14*S*)-10,13-dimethyl-9,10,11,12,13,14,15,16-octahydro-3*H*-cyclopenta[ $\alpha$ ]phenanthrene-3,17(8*H*)-dione

6

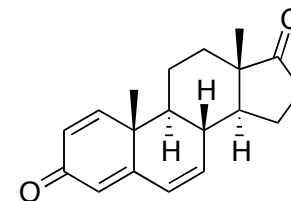

TRIENE

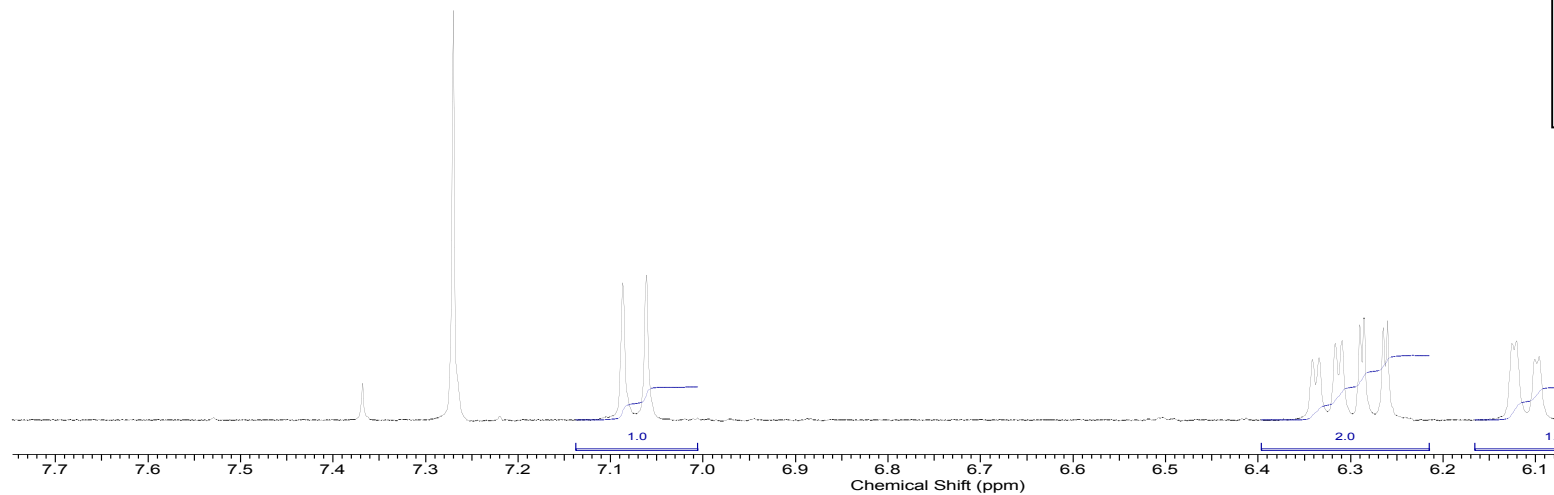

TRIENE

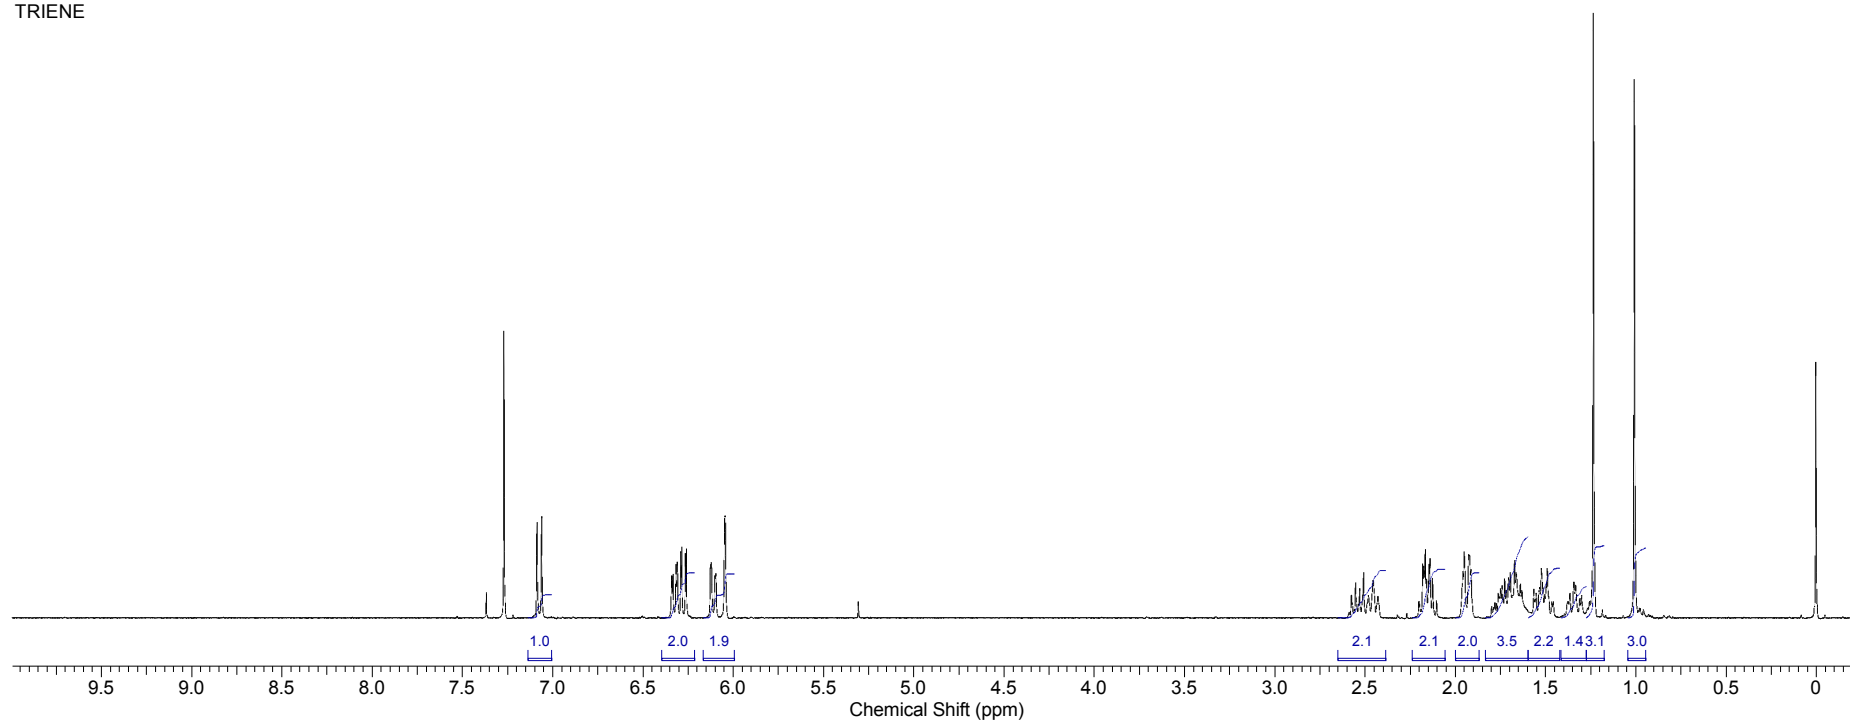

(8*R*,9*S*,10*R*,13*S*,14*S*)-10,13-dimethyl-9,10,11,12,13,14,15,16-octahydro-3*H*-cyclopenta[ $\alpha$ ]phenanthrene-3,17(8*H*)-dione

6



TRIENE\_C13

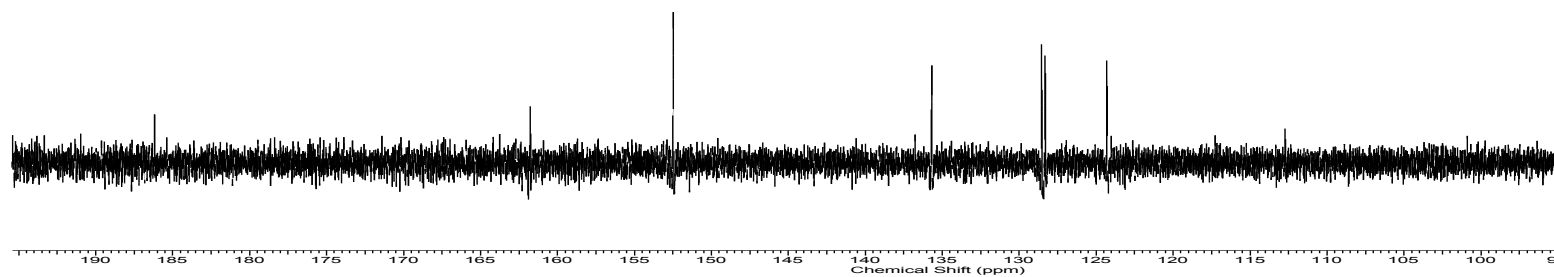

TRIENE\_C13

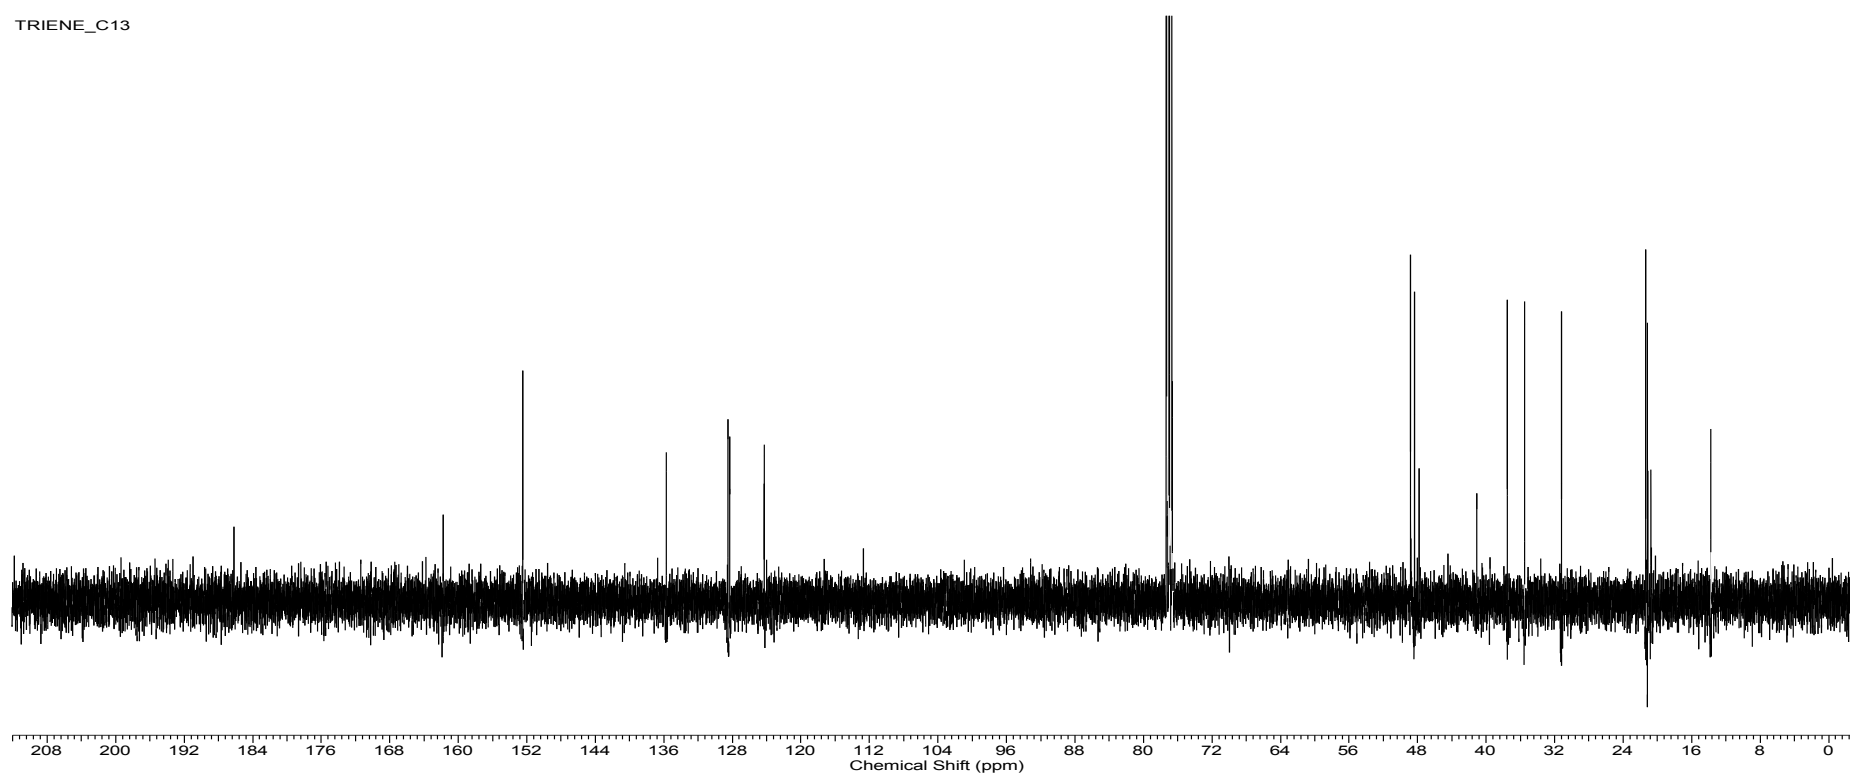

(8*R*,9*S*,10*R*,13*S*,14*S*)-4-ethoxy-3-hydroxy-10,13-dimethyl-7,8,9,10,11,12,13,14,15,16-decahydro-1*H*-cyclopenta[ $\alpha$ ]phenanthren-17(2*H*)-one

**7a**

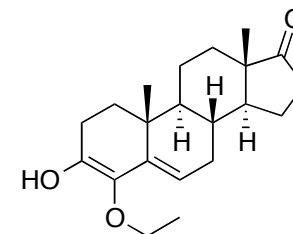

DMR590\_LONG

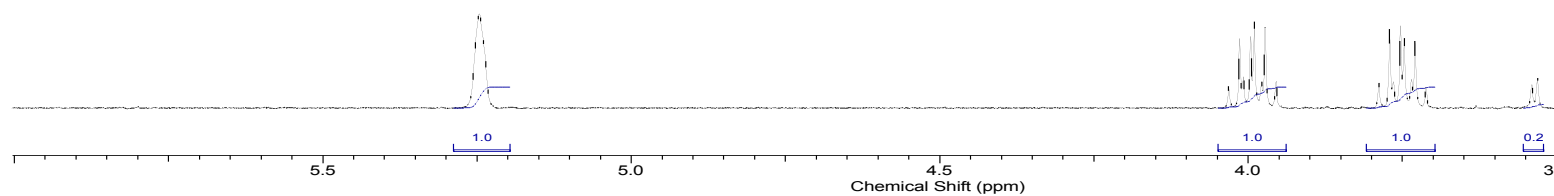

DMR590\_LONG

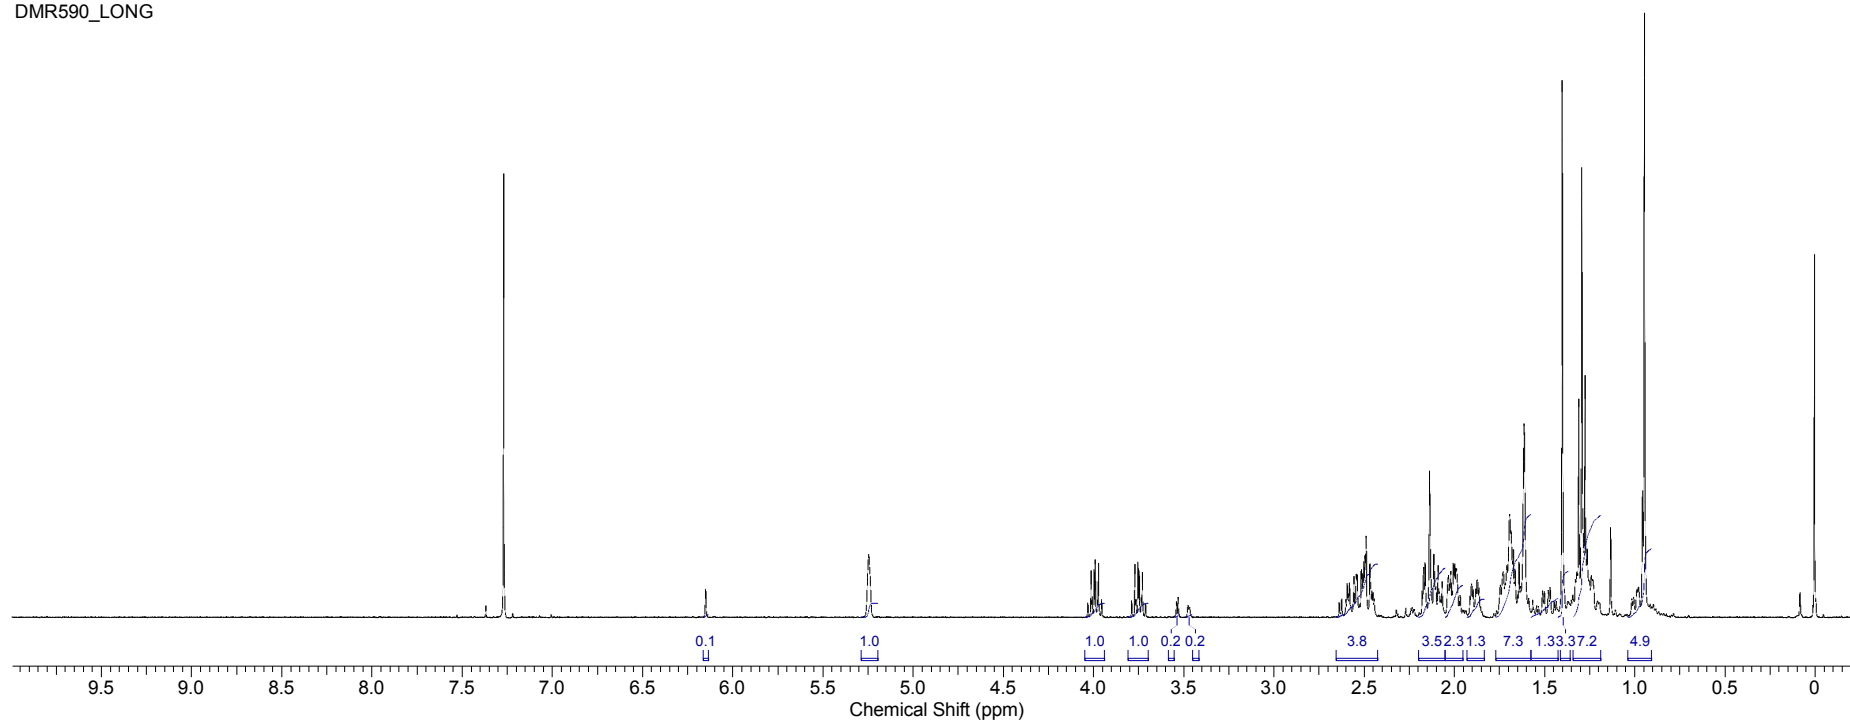

(8*R*,9*S*,10*R*,13*S*,14*S*)-4-ethoxy-3-hydroxy-10,13-dimethyl-7,8,9,10,11,12,13,14,15,16-decahydro-1*H*-cyclopenta[ $\alpha$ ]phenanthren-17(2*H*)-one

**7a**

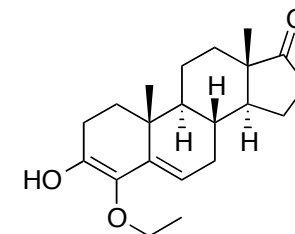

DMR590CARBON

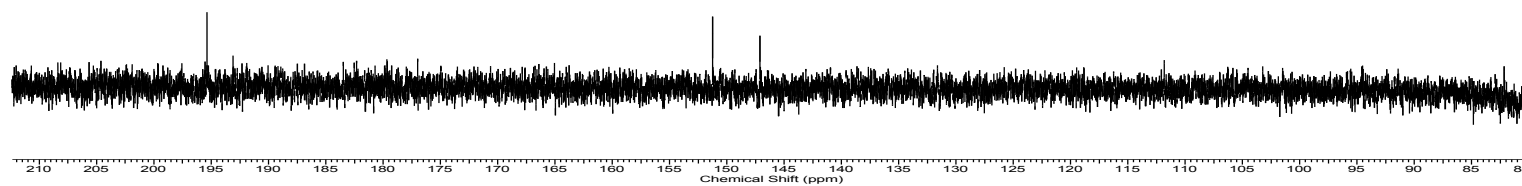

DMR590CARBON

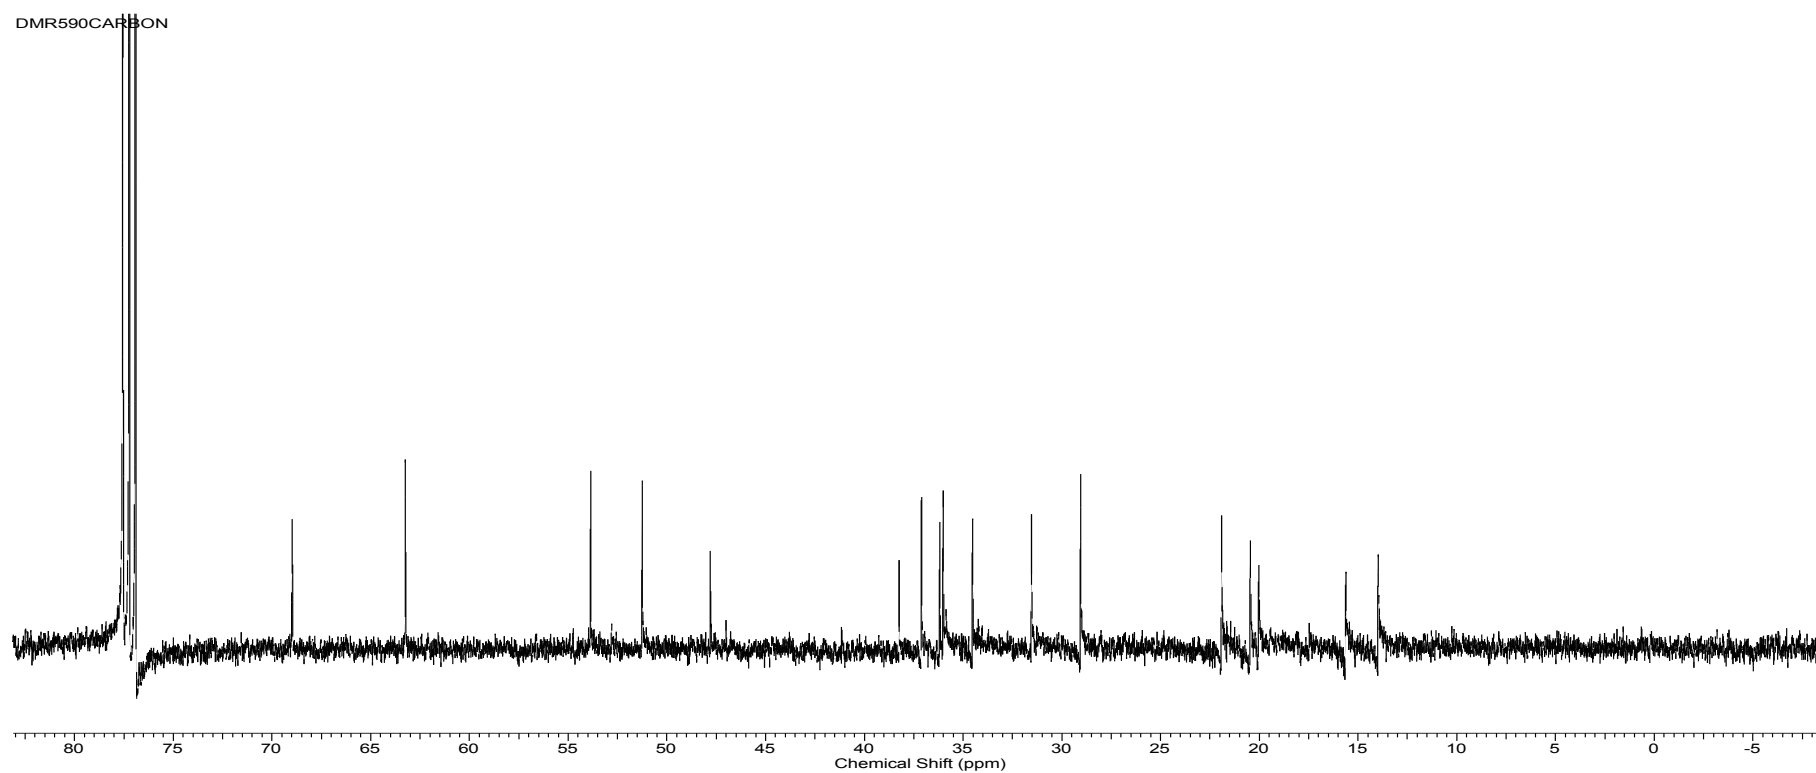

(8*R*,9*S*,10*R*,13*S*,14*S*)-3-hydroxy-4-methoxy-10,13-dimethyl-7,8,9,10,11,12,13,14,15,16-decahydro-1*H*-cyclopenta[ $\alpha$ ]phenanthren-17(2*H*)-one

**7b**

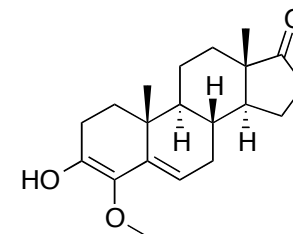

DMR314B

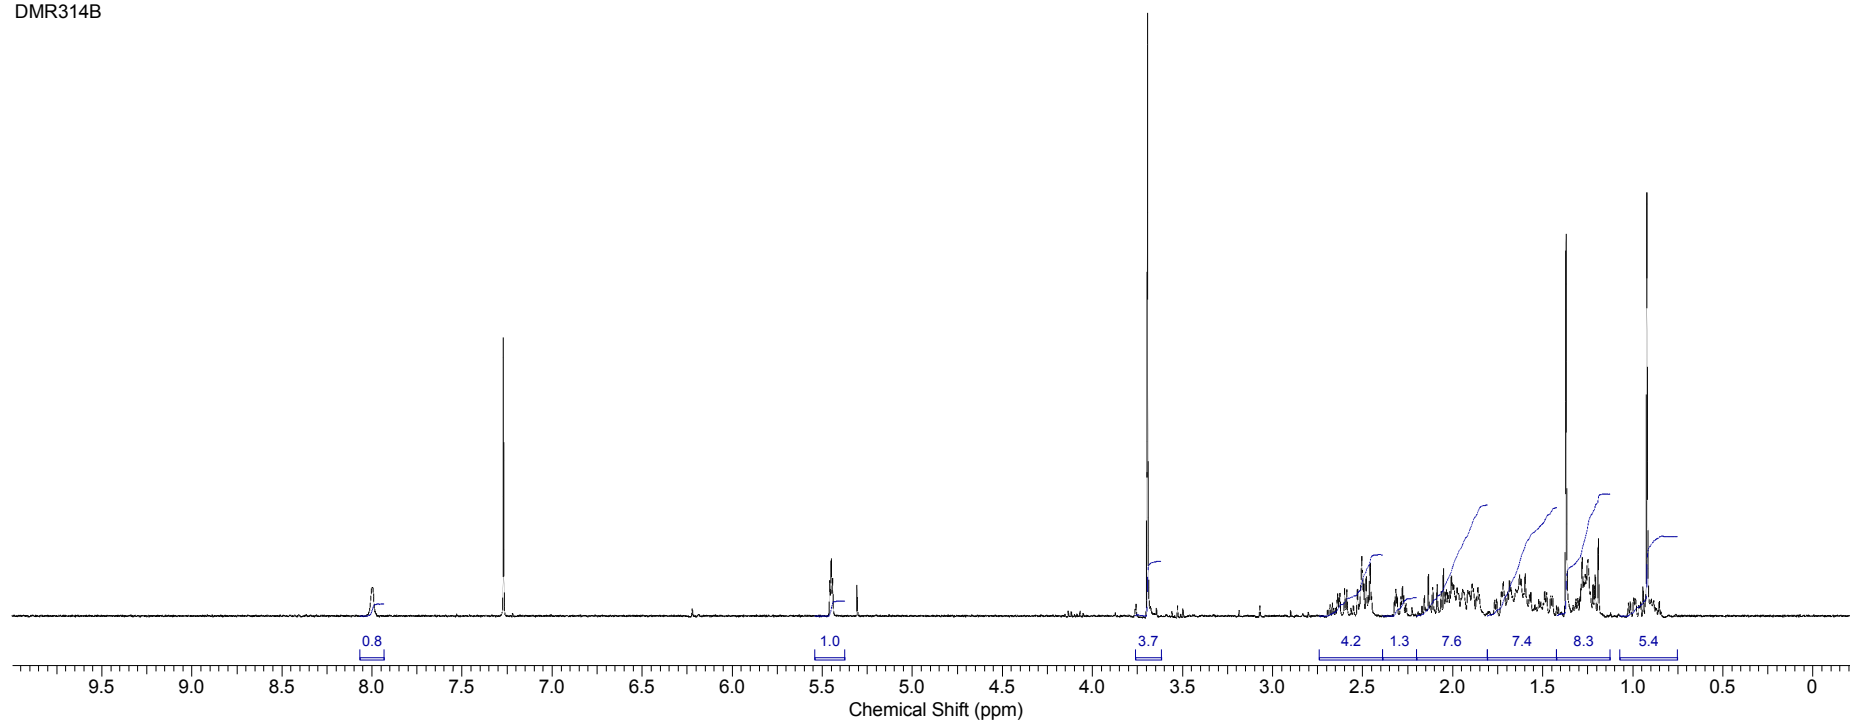

(8*R*,9*S*,10*R*,13*S*,14*S*)-3-hydroxy-4-methoxy-10,13-dimethyl-7,8,9,10,11,12,13,14,15,16-decahydro-1*H*-cyclopenta[ $\alpha$ ]phenanthren-17(2*H*)-one

**7b**

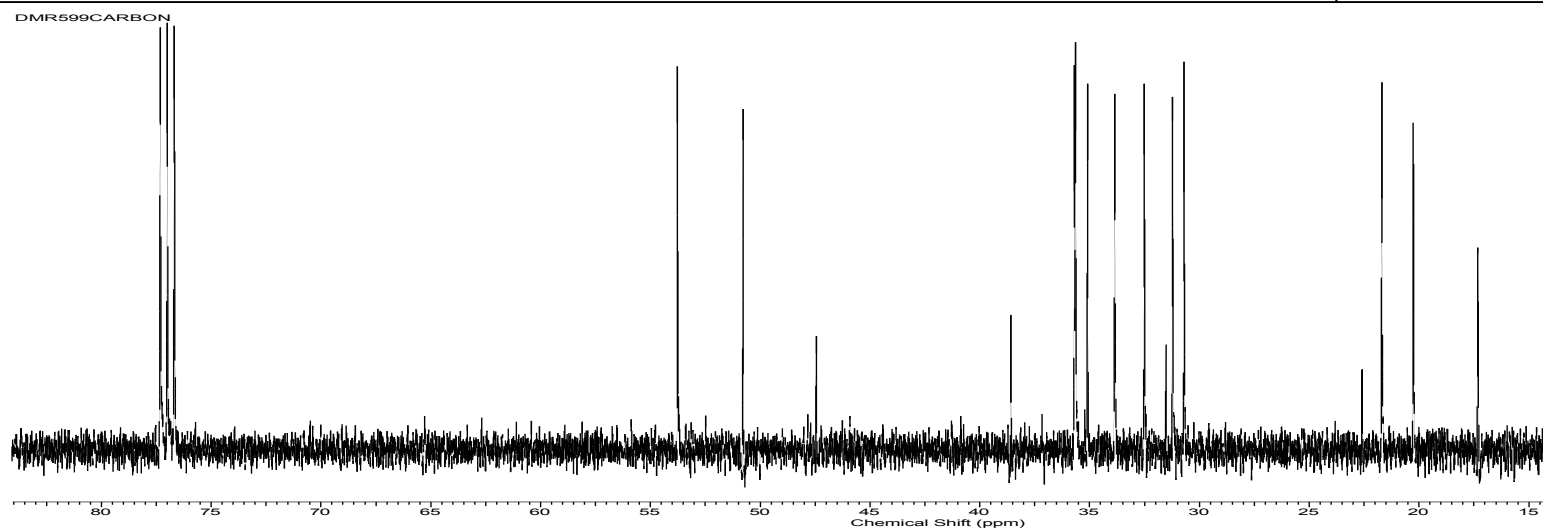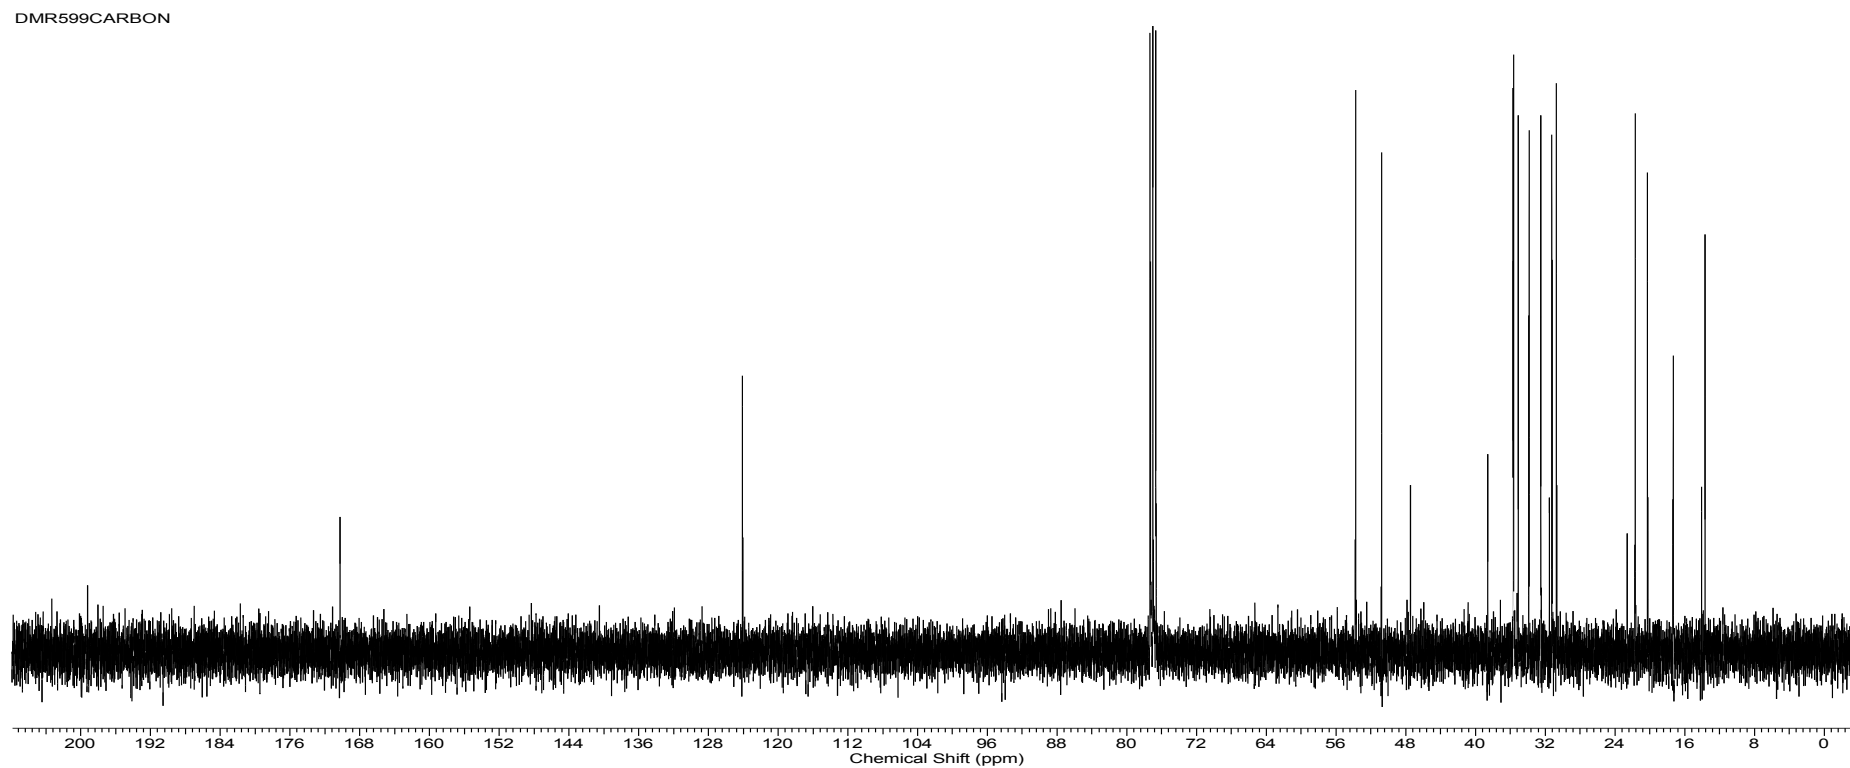



(8*R*,9*S*,10*R*,13*S*,14*S*)-4-(benzyloxy)-3-hydroxy-10,13-dimethyl-7,8,9,10,11,12,13,14,15,16-decahydro-1*H*-cyclopenta[*a*]phenanthren-17(2*H*)-one

**7c**

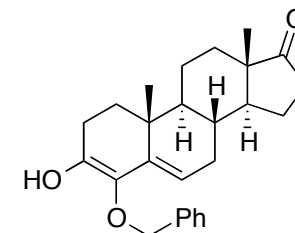

DMR486A

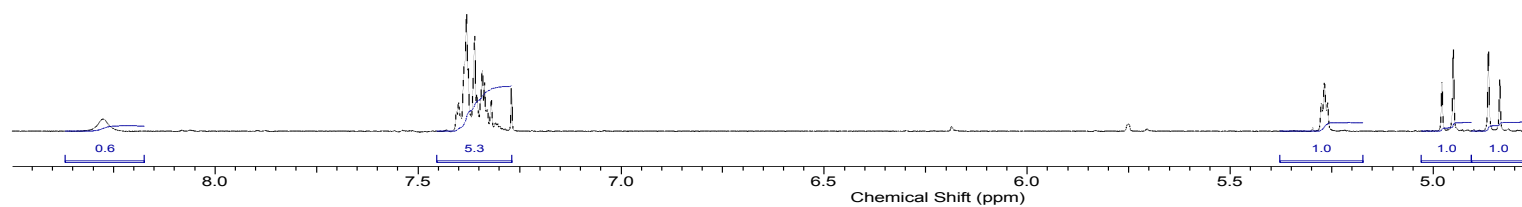

DMR486A

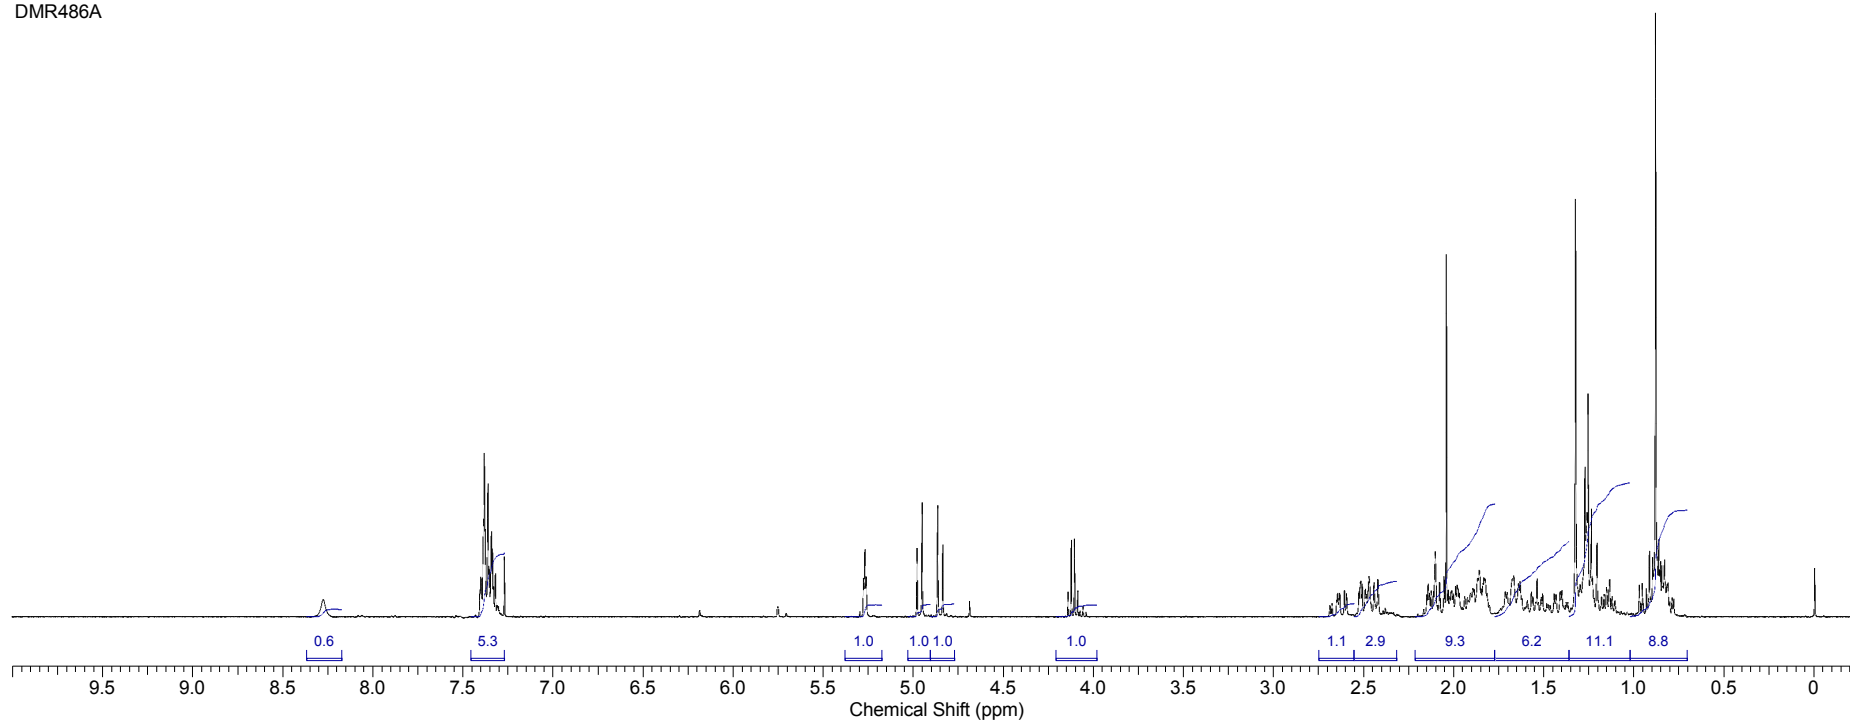

(8*R*,9*S*,10*R*,13*S*,14*S*)-4-(benzyloxy)-3-hydroxy-10,13-dimethyl-7,8,9,10,11,12,13,14,15,16-decahydro-1*H*-cyclopenta[ $\alpha$ ]phenanthren-17(2*H*)-one

**7c**

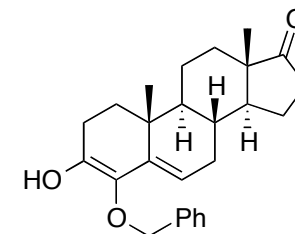

DMR575CARBON

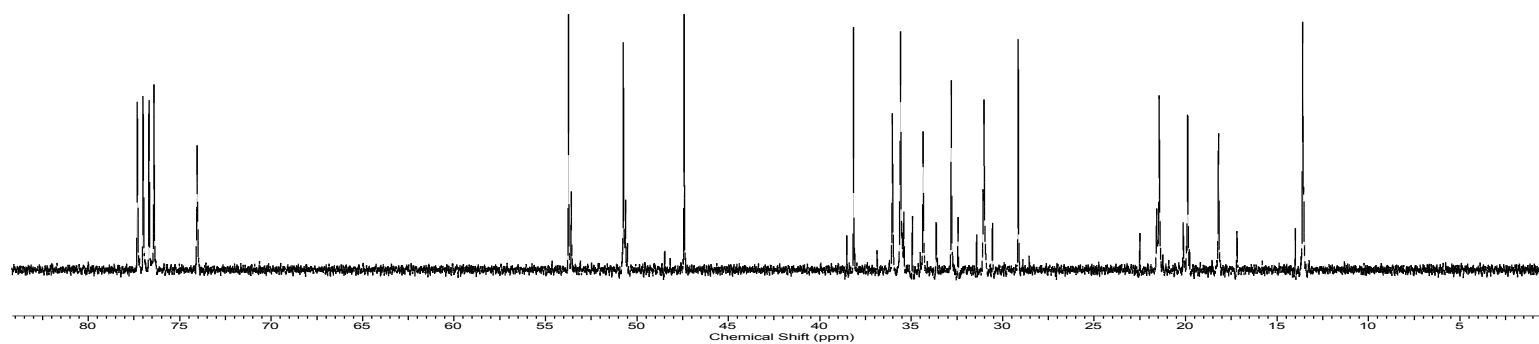

DMR575CARBON

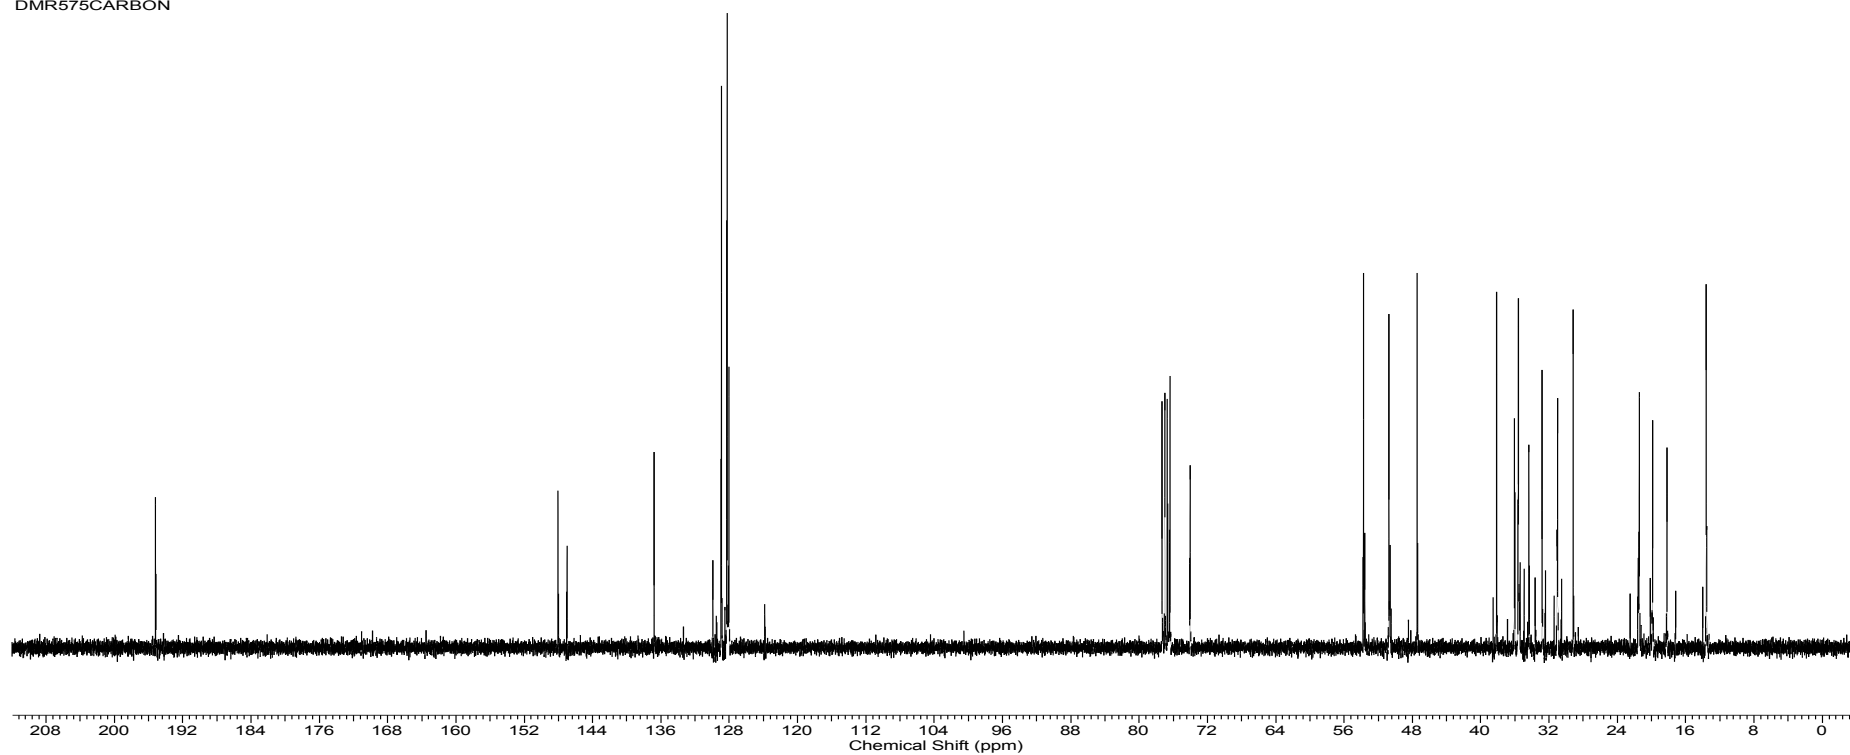

(6*R*,8*R*,9*S*,10*R*,13*S*,14*S*)-6-ethoxy-10,13-dimethyl-7,8,9,10,11,12,13,14,15,16-decahydro-3*H*-cyclopenta[ $\alpha$ ]phenanthrene-3,17(6*H*)-dione

**8a**

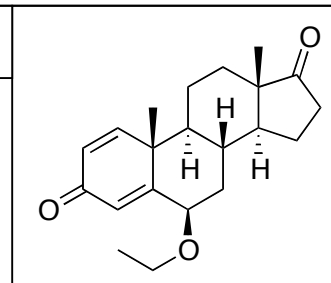

DMR392\_600

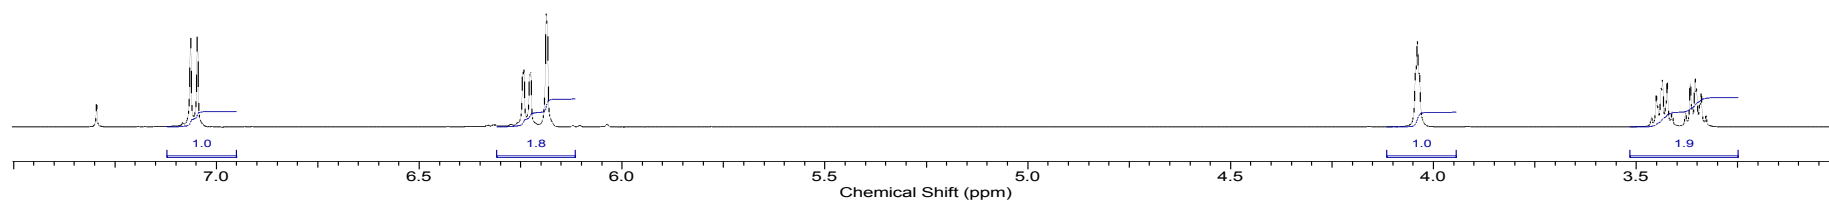

DMR392\_600

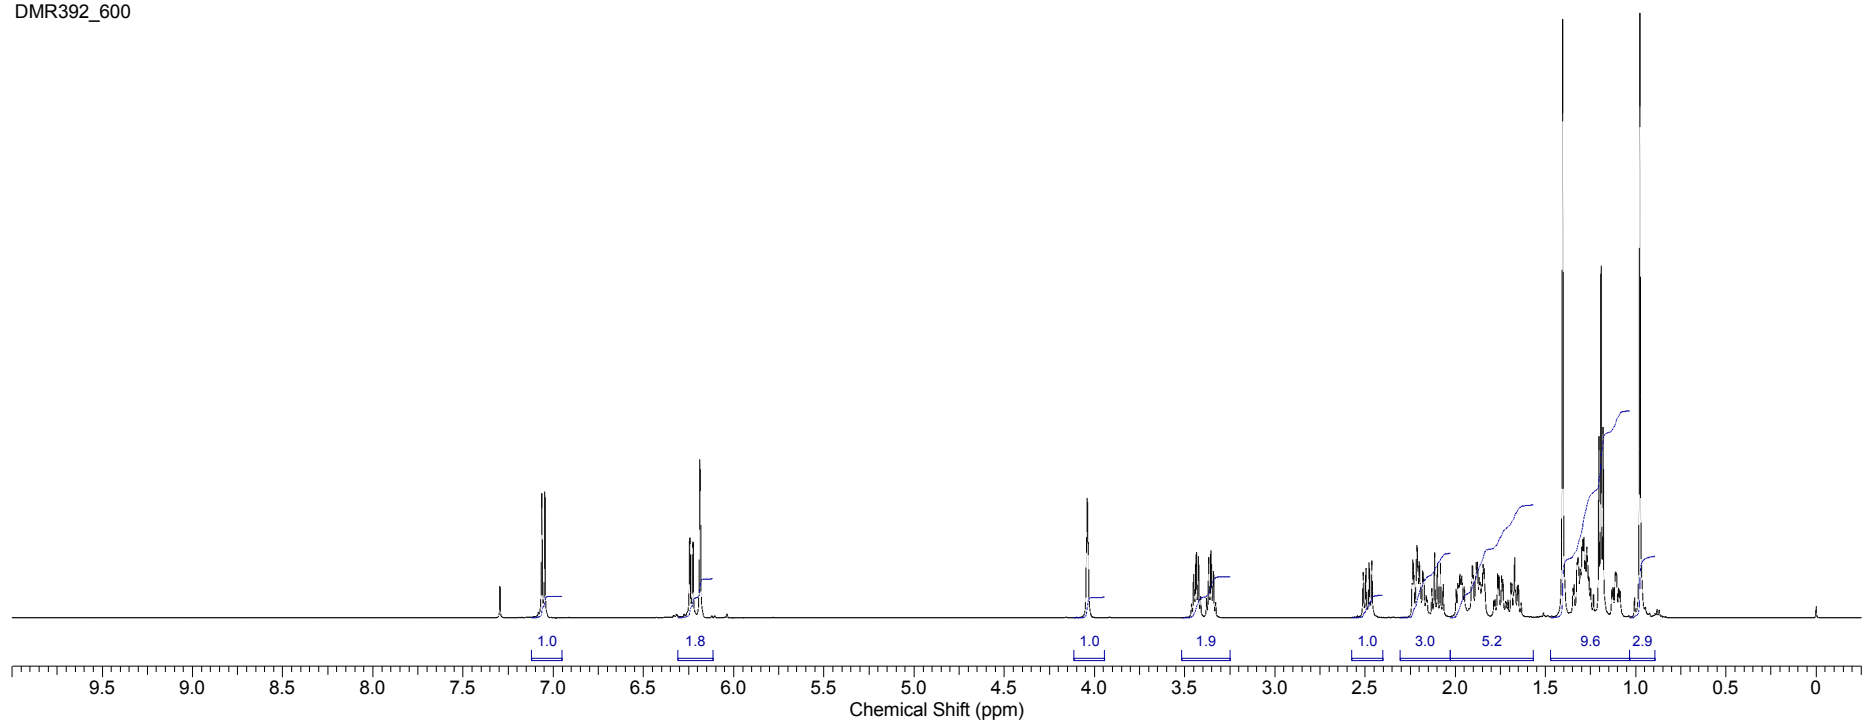

(6*R*,8*R*,9*S*,10*R*,13*S*,14*S*)-6-ethoxy-10,13-dimethyl-7,8,9,10,11,12,13,14,15,16-decahydro-3*H*-cyclopenta[ $\alpha$ ]phenanthrene-3,17(6*H*)-dione

**8a**

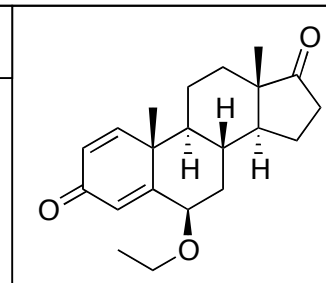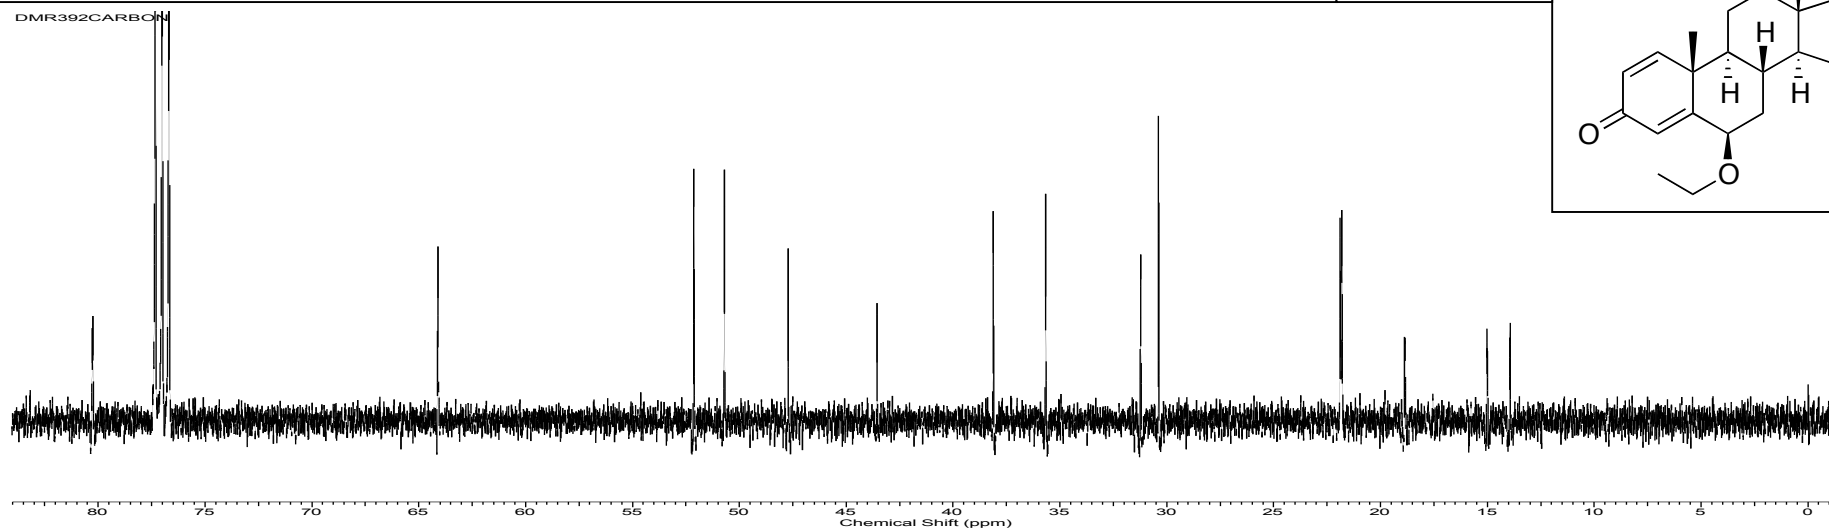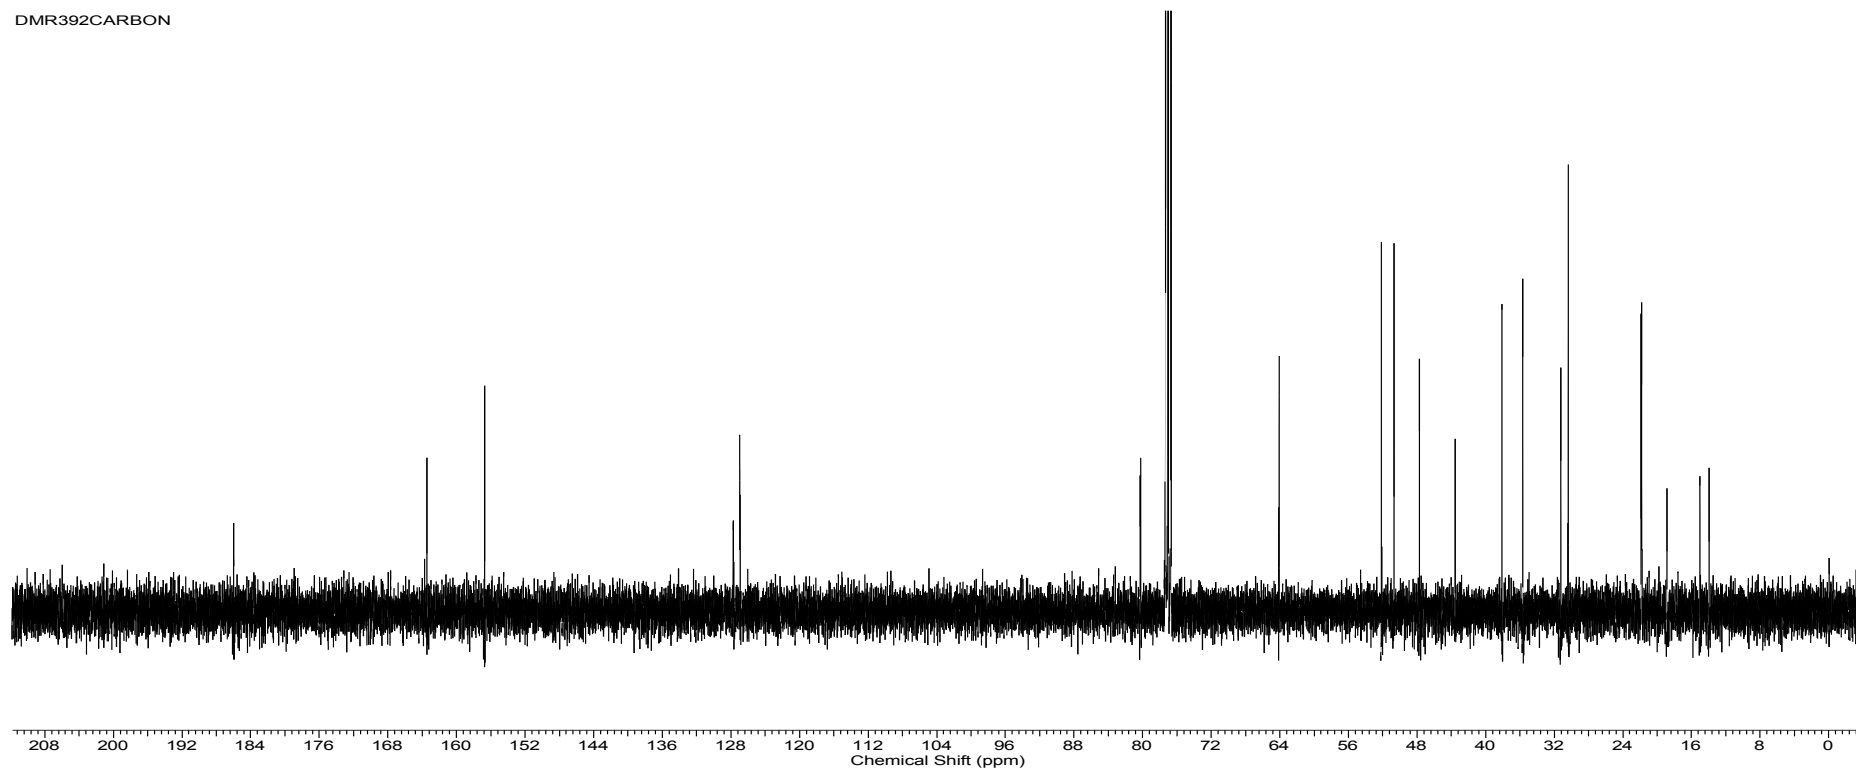

(6*R*,8*R*,9*S*,10*R*,13*S*,14*S*)-6-methoxy-10,13-dimethyl-7,8,9,10,11,12,13,14,15,16-decahydro-3*H*-cyclopenta[ $\alpha$ ]phenanthrene-3,17(6*H*)-dione

**8b**

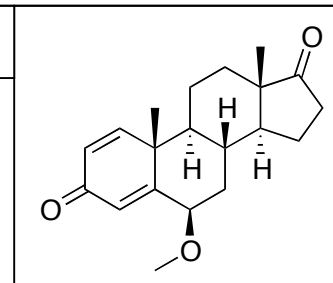

DMR268CLEAN

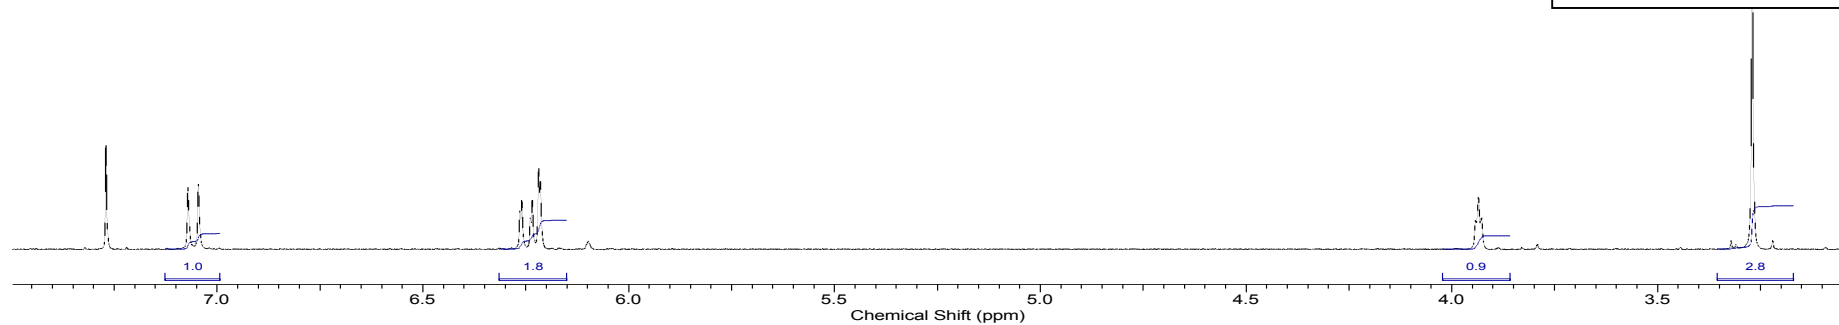

DMR268CLEAN

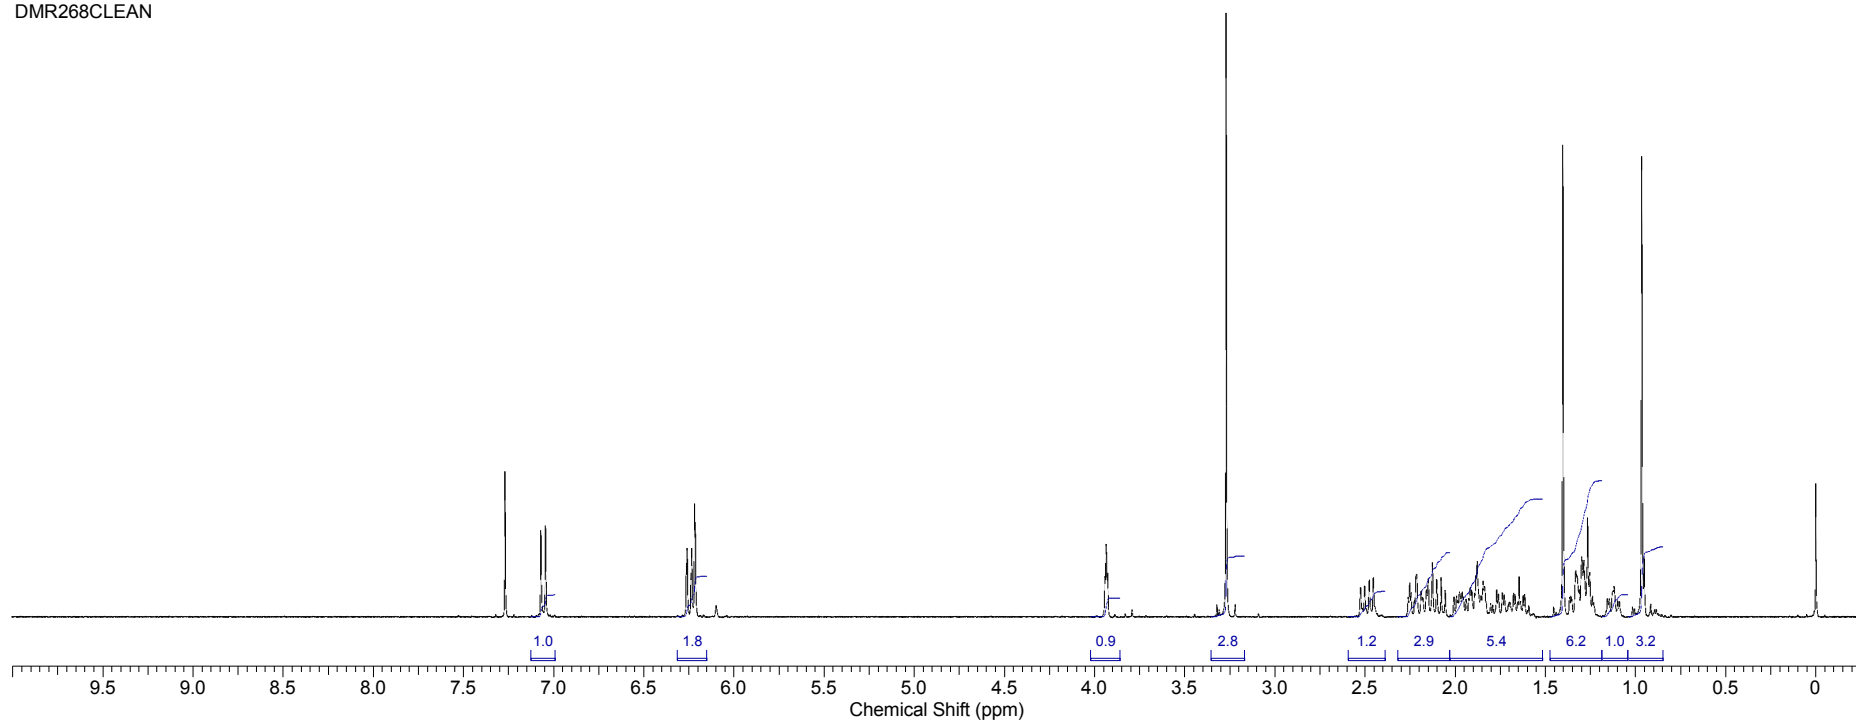

(6*R*,8*R*,9*S*,10*R*,13*S*,14*S*)-6-methoxy-10,13-dimethyl-7,8,9,10,11,12,13,14,15,16-decahydro-3*H*-cyclopenta[ $\alpha$ ]phenanthrene-3,17(6*H*)-dione

**8b**

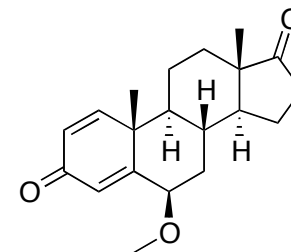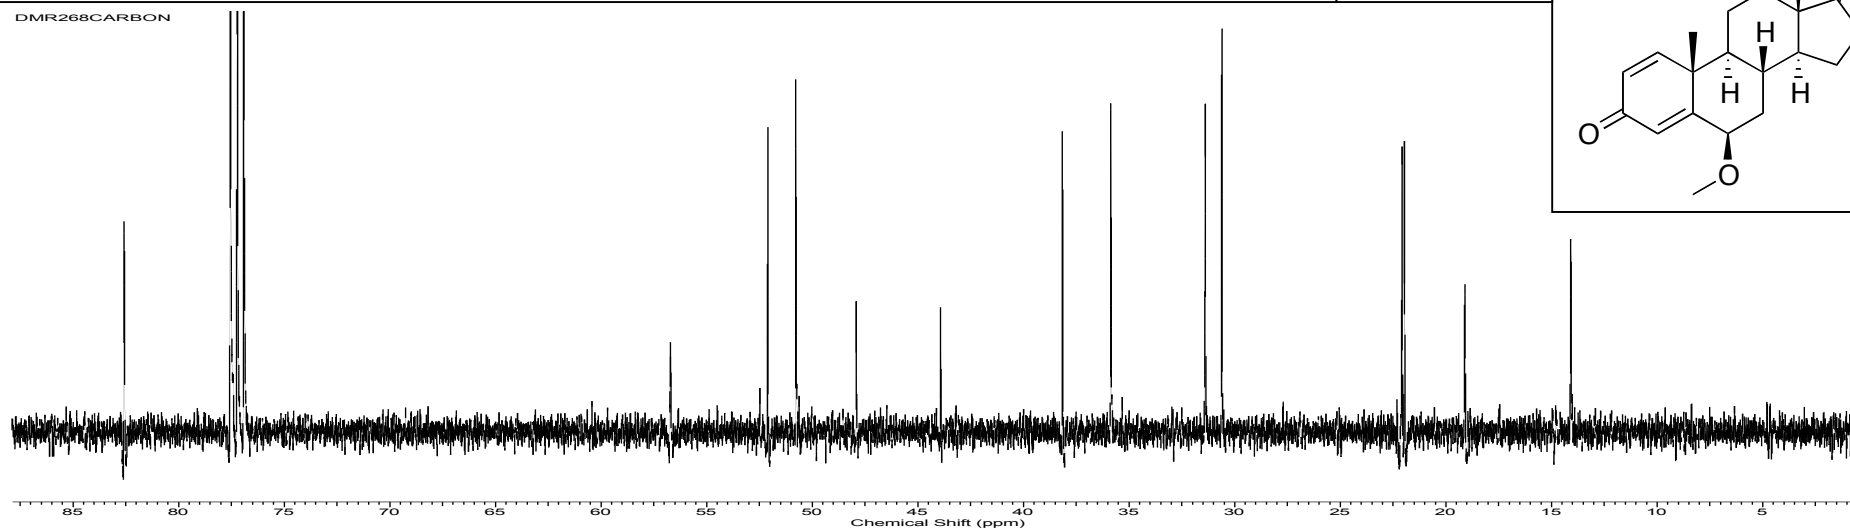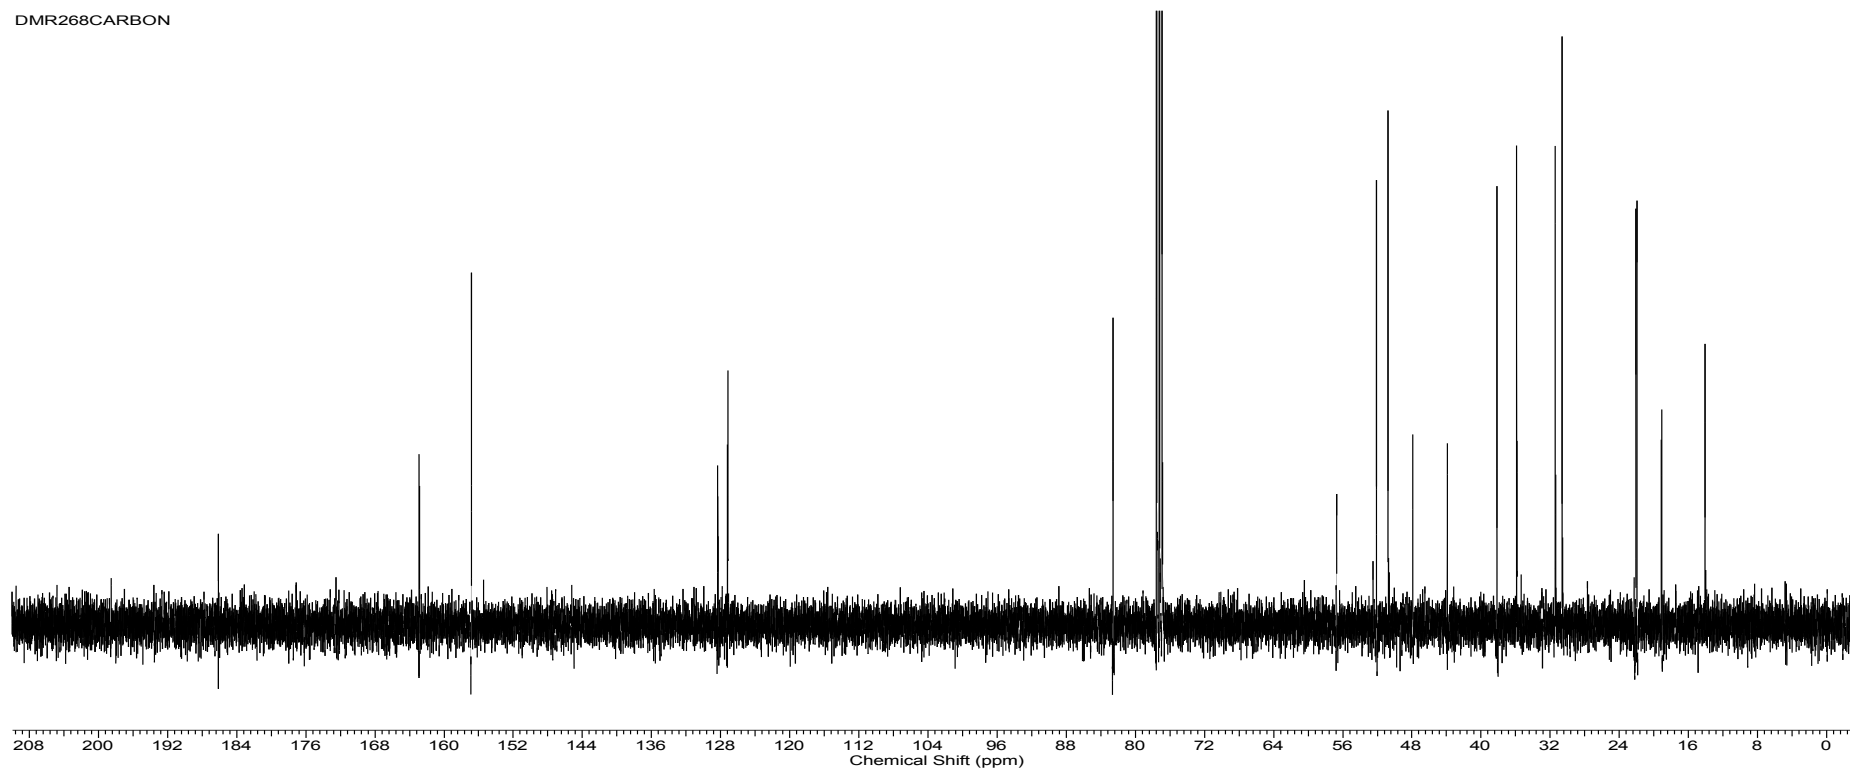

(6*R*,8*R*,9*S*,10*R*,13*S*,14*S*)-6-(benzyloxy)-10,13-dimethyl-7,8,9,10,11,12,13,14,15,16-decahydro-3*H*-cyclopenta[ $\alpha$ ]phenanthrene-3,17(6*H*)-dione

**8c**

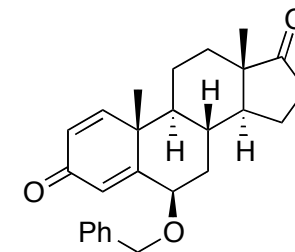

DMR299\_600

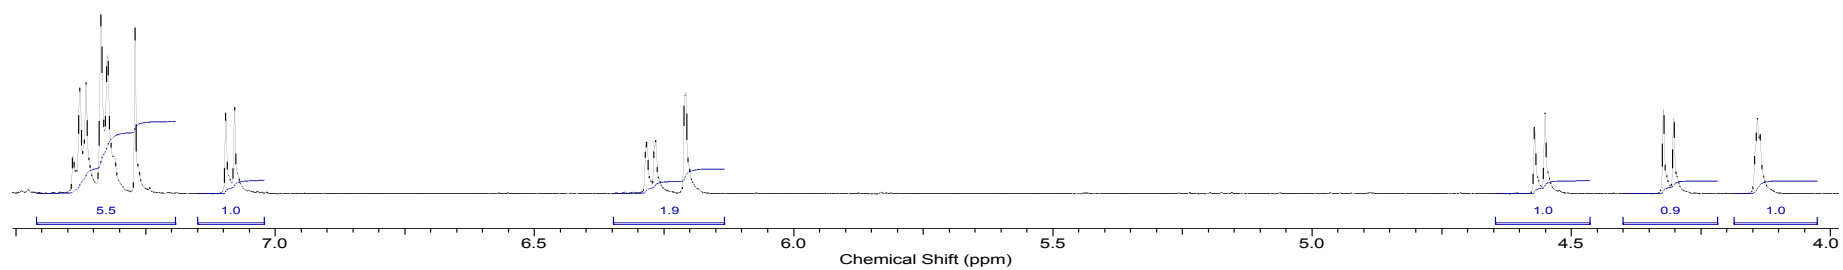

DMR299\_600

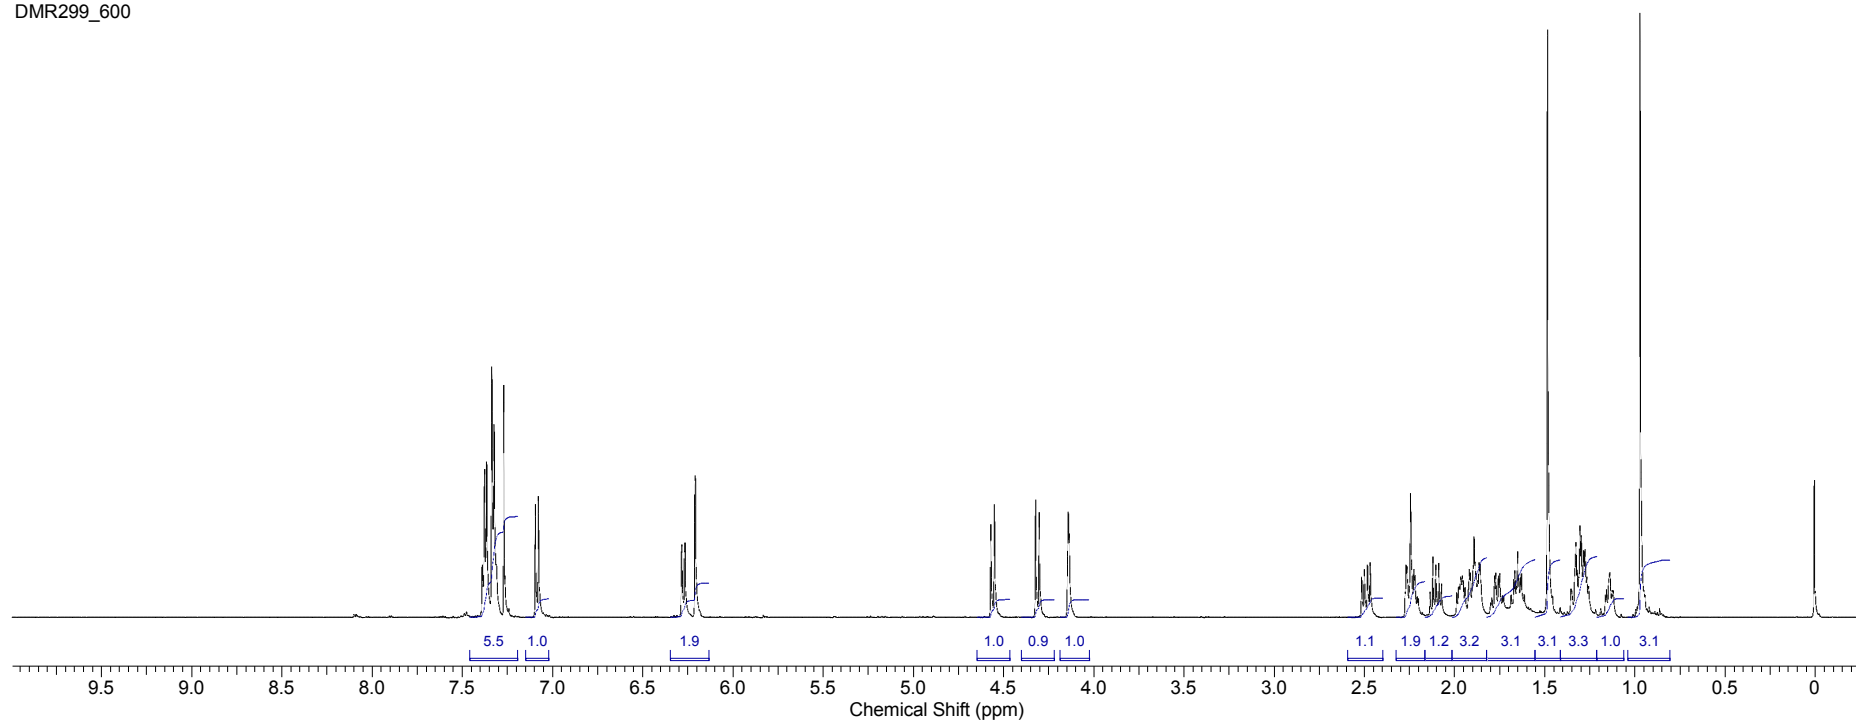

(6*R*,8*R*,9*S*,10*R*,13*S*,14*S*)-6-(benzyloxy)-10,13-dimethyl-7,8,9,10,11,12,13,14,15,16-decahydro-3*H*-cyclopenta[ $\alpha$ ]phenanthrene-3,17(6*H*)-dione

**8c**

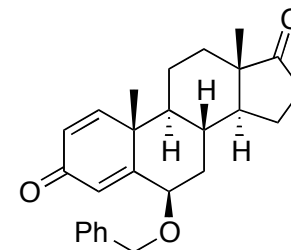

DMR299CARBON

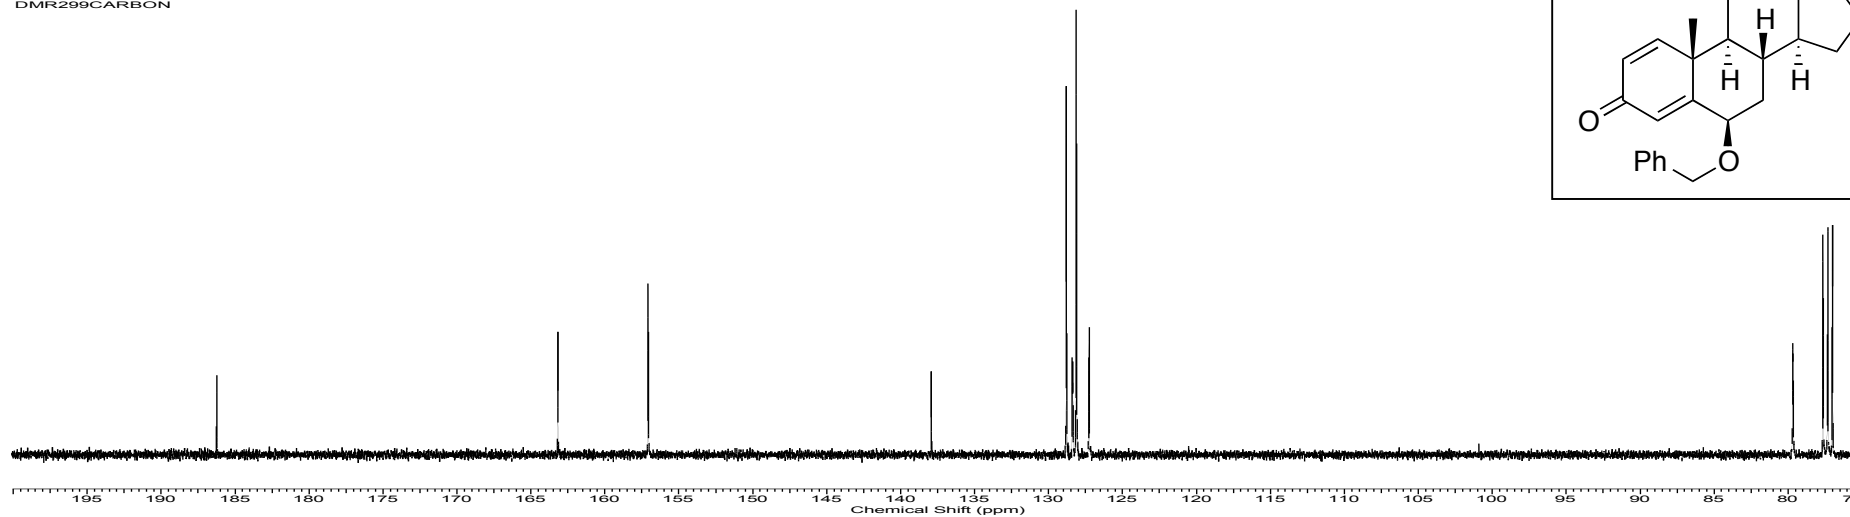

DMR299CARBON

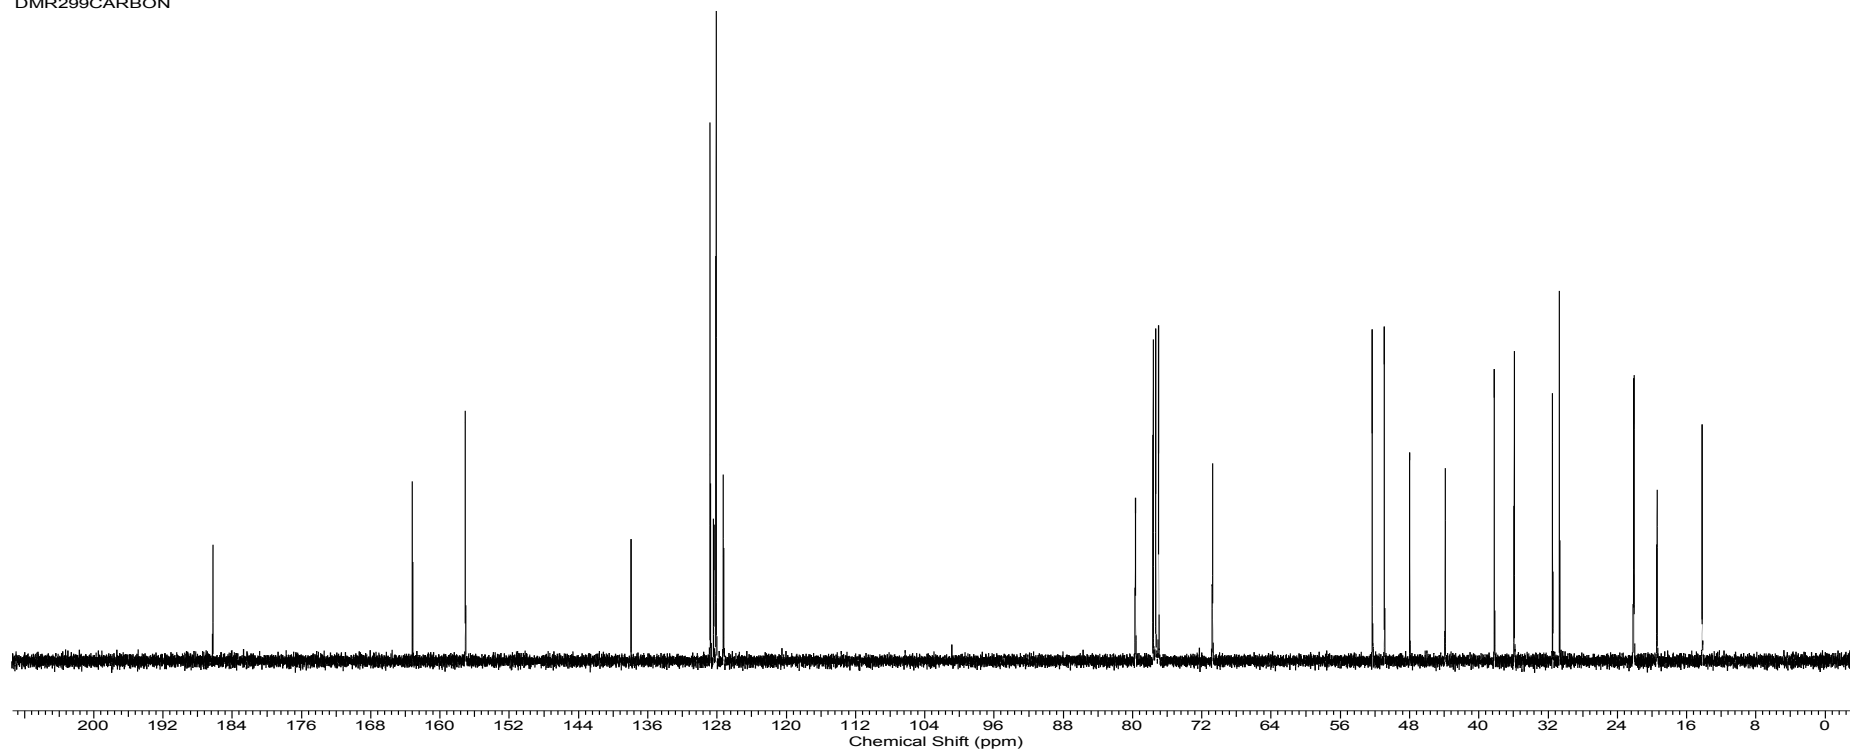



(6*R*,8*R*,9*S*,10*R*,13*S*,14*S*)-6-(*tert*-butoxy)-10,13-dimethyl-7,8,9,10,11,12,13,14,15,16-decahydro-3*H*-cyclopenta[ $\alpha$ ]phenanthrene-3,17(6*H*)-dione

**8d**

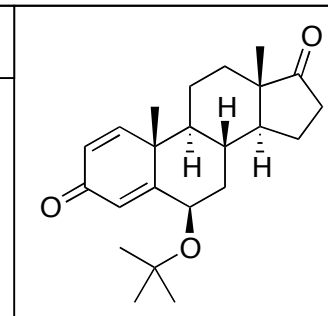

DMR251PROTON

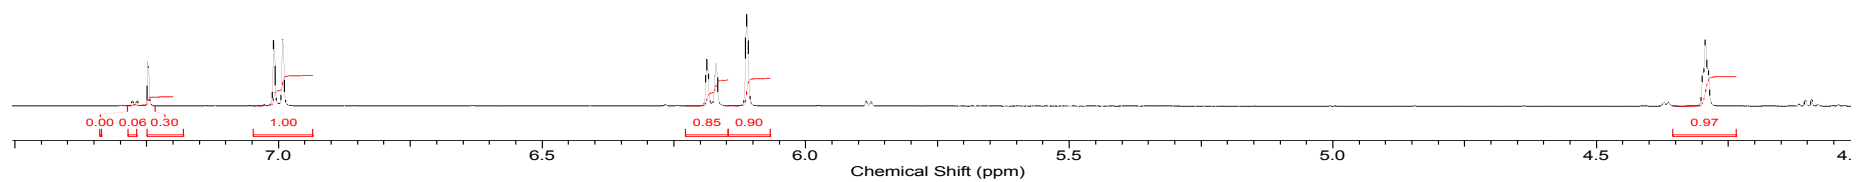

DMR251PROTON

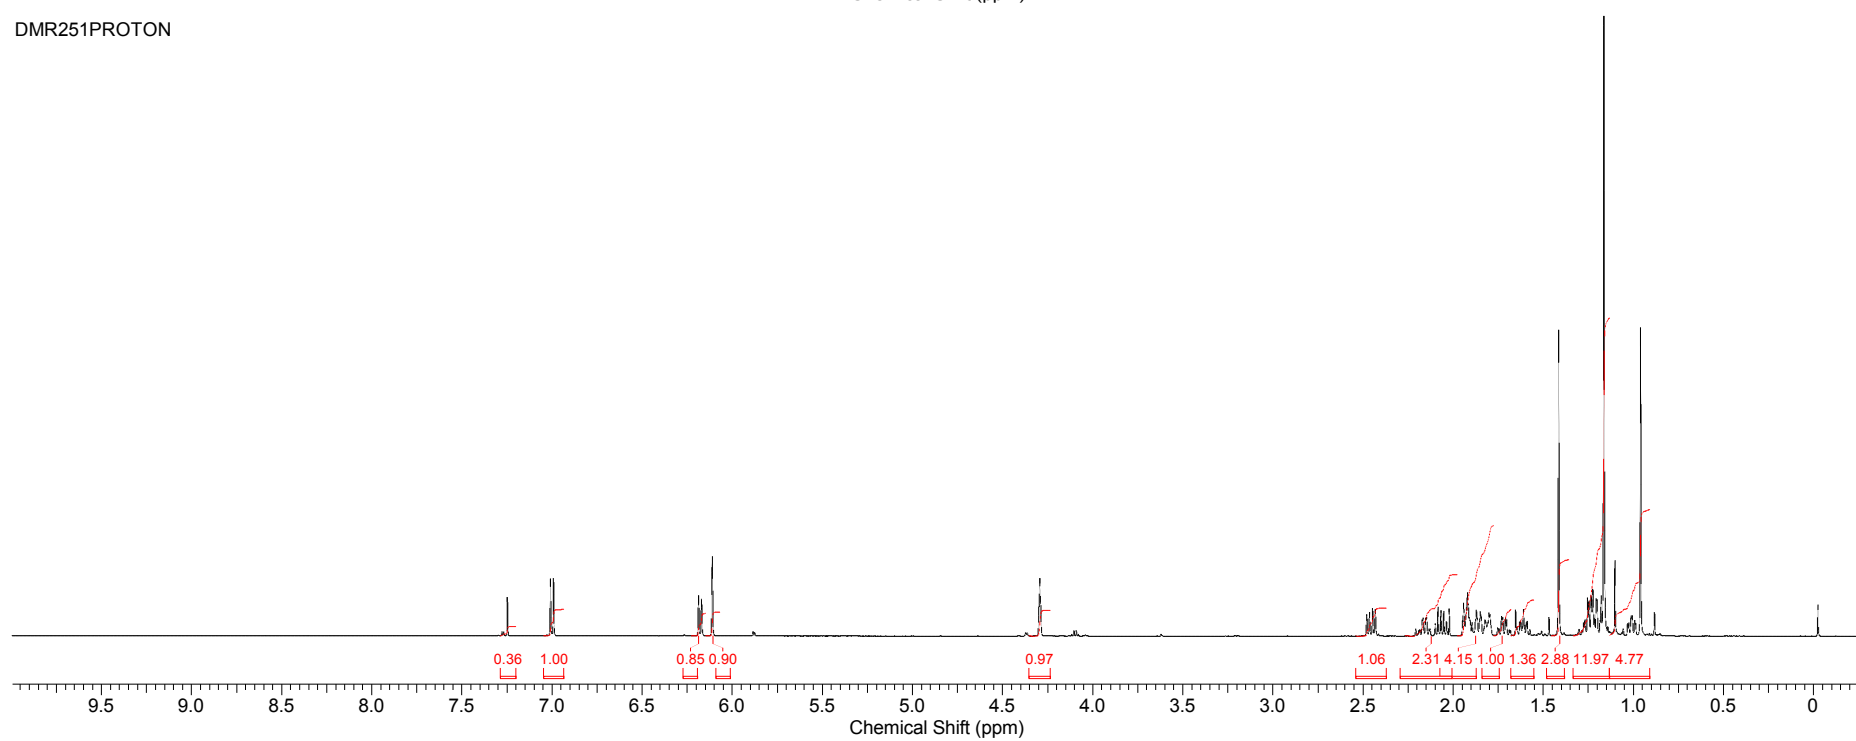

(6*R*,8*R*,9*S*,10*R*,13*S*,14*S*)-6-(*tert*-butoxy)-10,13-dimethyl-7,8,9,10,11,12,13,14,15,16-decahydro-3*H*-cyclopenta[ $\alpha$ ]phenanthrene-3,17(6*H*)-dione

**8d**

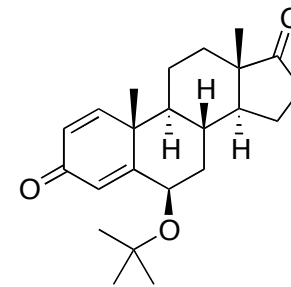

DMR251CARBON

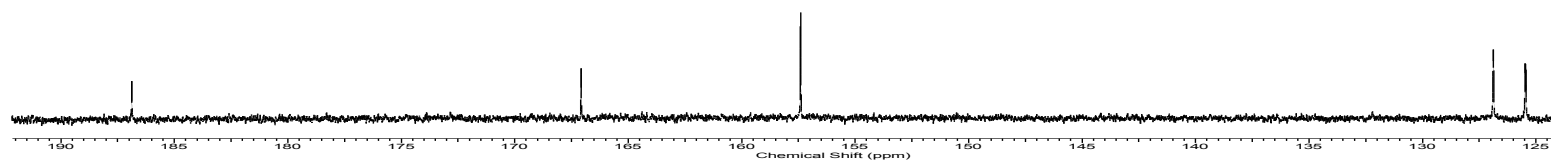

DMR251CARBON

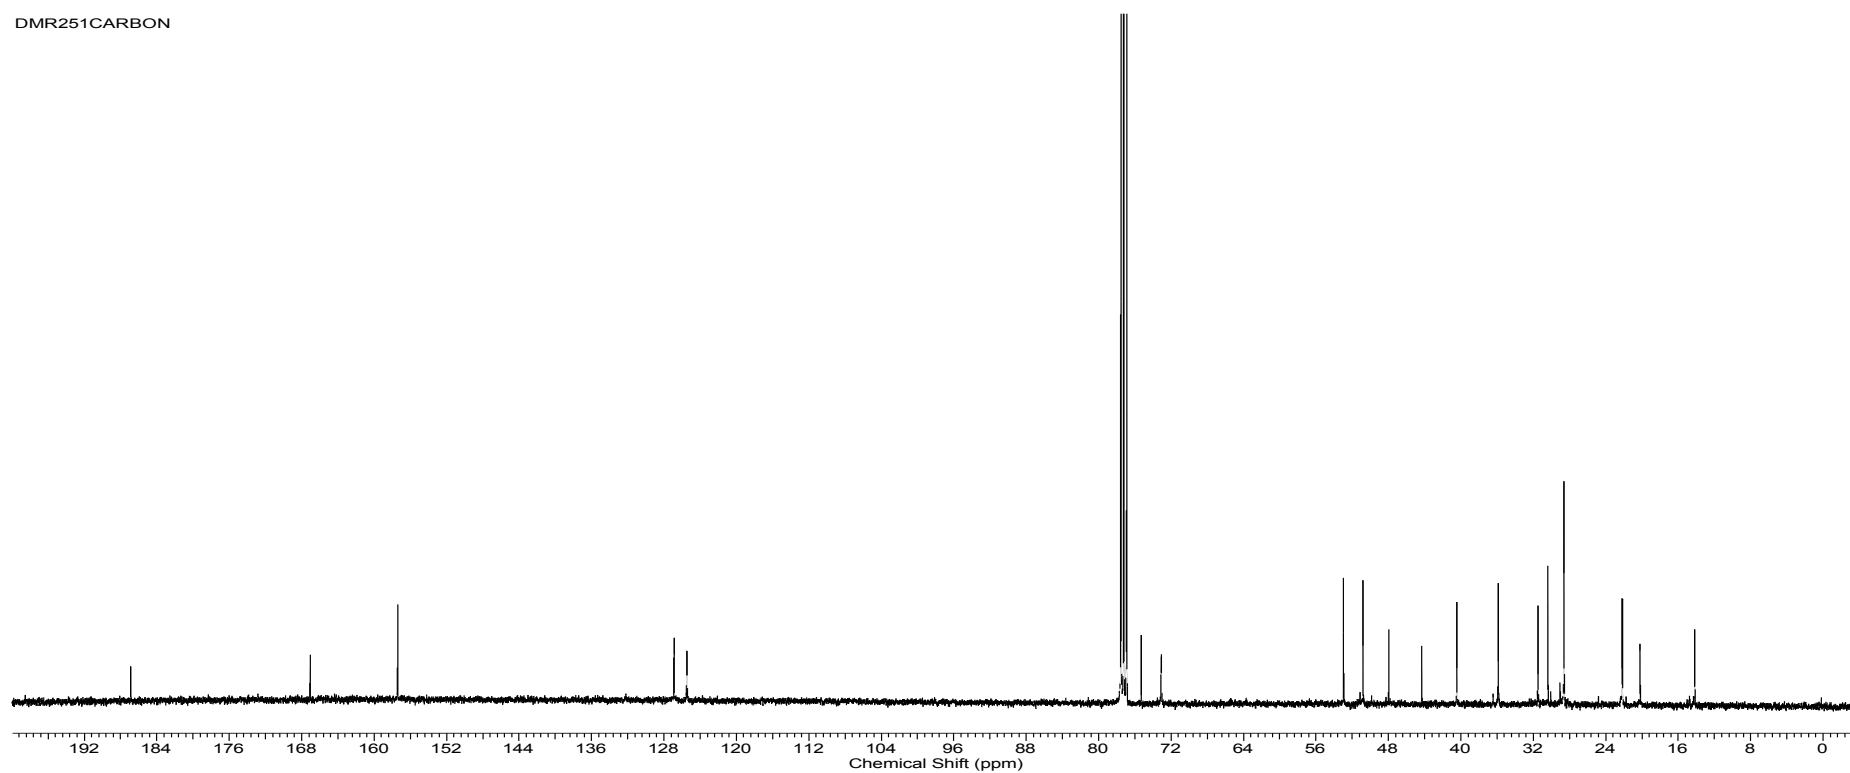

(6*R*,8*R*,9*S*,10*R*,13*S*,14*S*)-10,13-dimethyl-3,17-dioxo-6,7,8,9,10,11,12,13,14,15,16,17-dodecahydro-3*H*-cyclopenta[*a*]phenanthren-6-yl acetate

8e

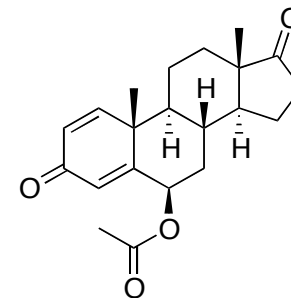

HDDG033PROTON

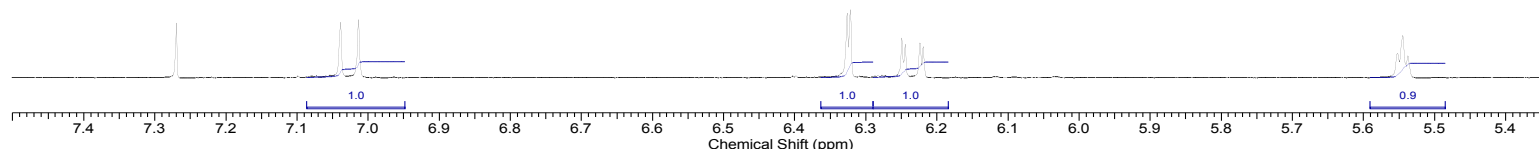

HDDG033PROTON

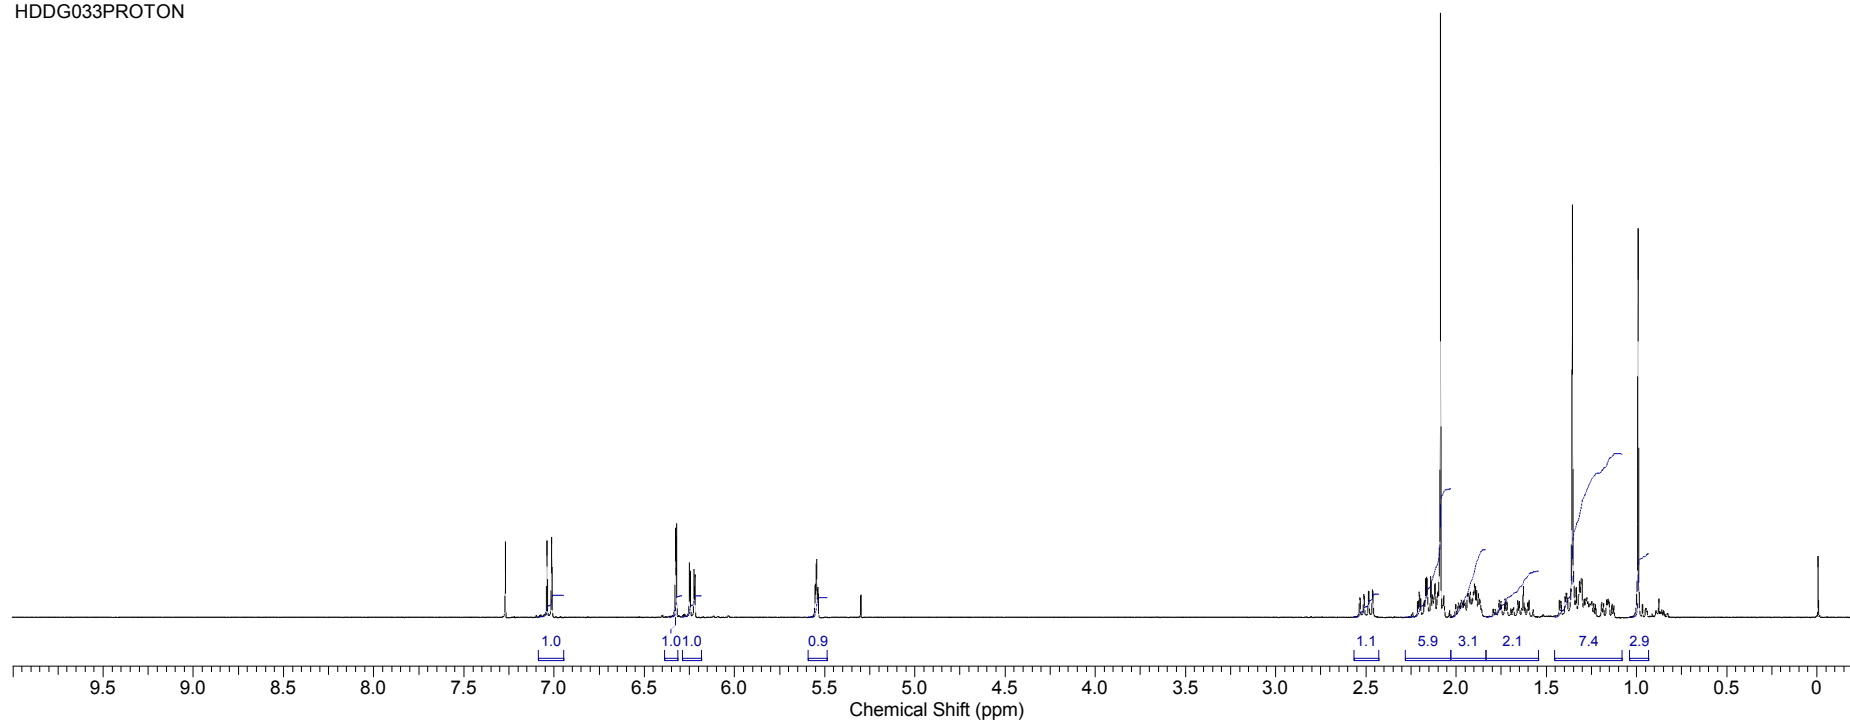

(6*R*,8*R*,9*S*,10*R*,13*S*,14*S*)-10,13-dimethyl-3,17-dioxo-6,7,8,9,10,11,12,13,14,15,16,17-dodecahydro-3*H*-cyclopenta[*a*]phenanthren-6-yl acetate

8e

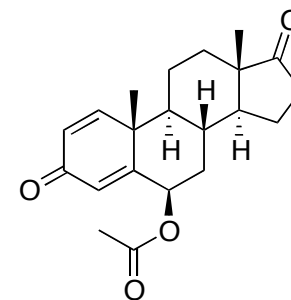

HDDG033C13

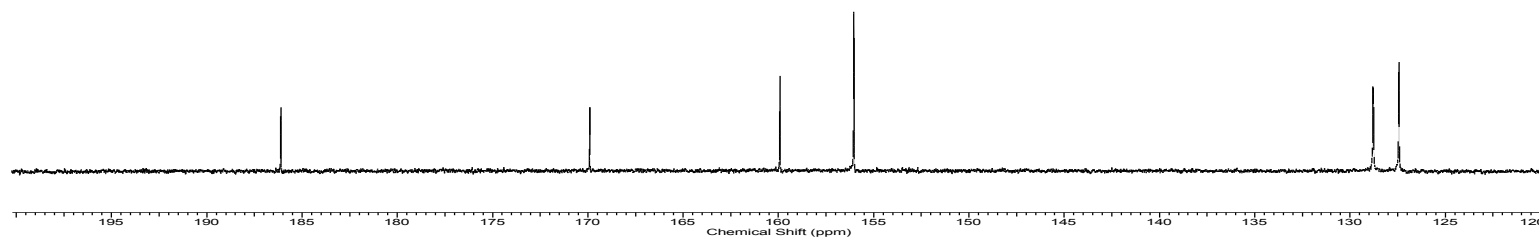

HDDG033C13

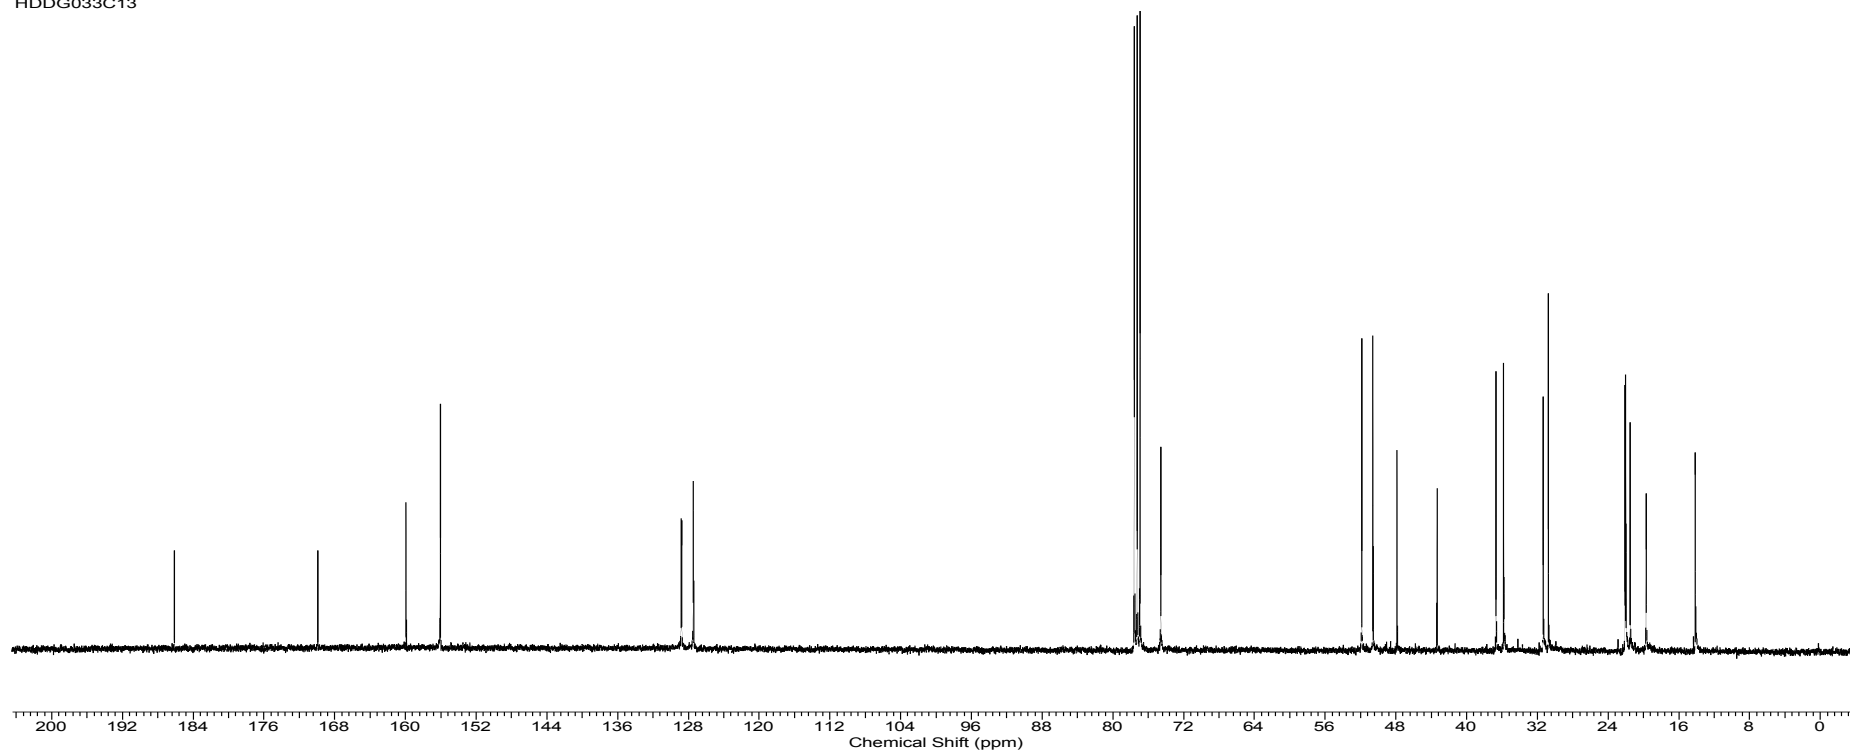

(6*R*,8*R*,9*S*,10*R*,13*S*,14*S*)-10,13-dimethyl-3,17-dioxo-6,7,8,9,10,11,12,13,14,15,16,17-dodecahydro-3*H*-cyclopenta[*a*]phenanthren-6-yl propionate

8f

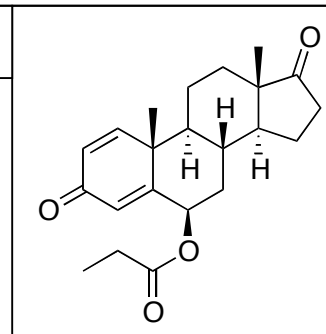

DMR293TOP

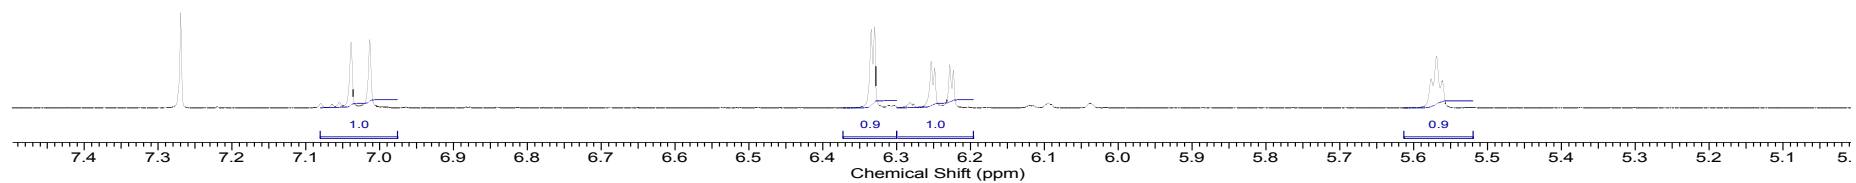

DMR293TOP

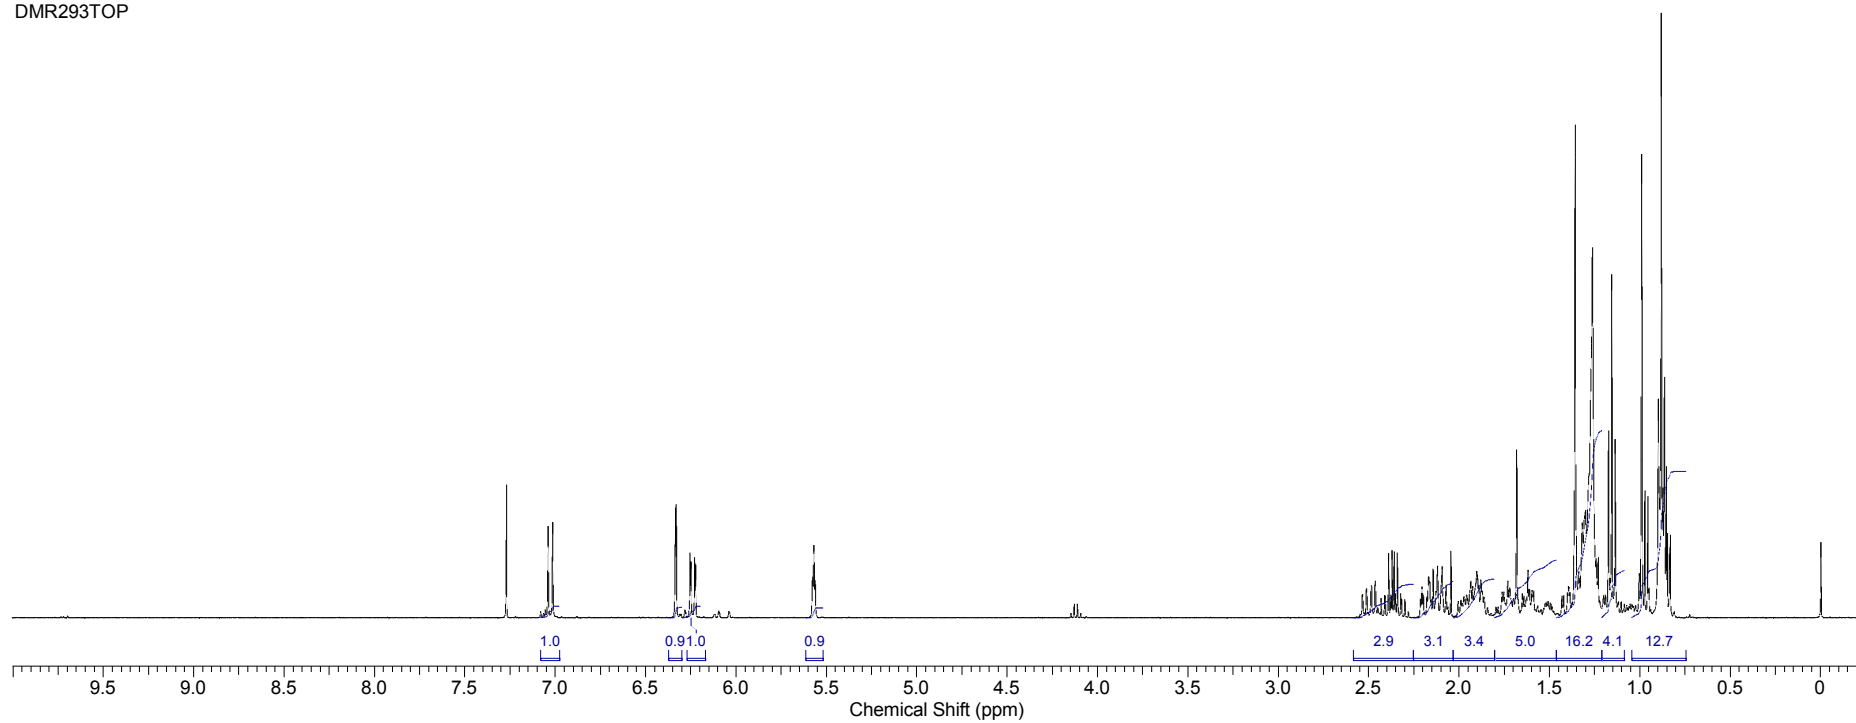

(6*R*,8*R*,9*S*,10*R*,13*S*,14*S*)-10,13-dimethyl-3,17-dioxo-6,7,8,9,10,11,12,13,14,15,16,17-dodecahydro-3*H*-cyclopenta[*a*]phenanthren-6-yl propionate

8f

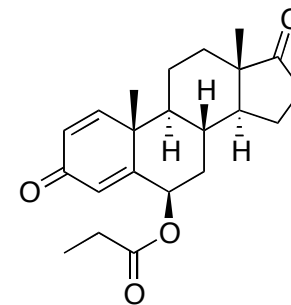

DMR293CARBON

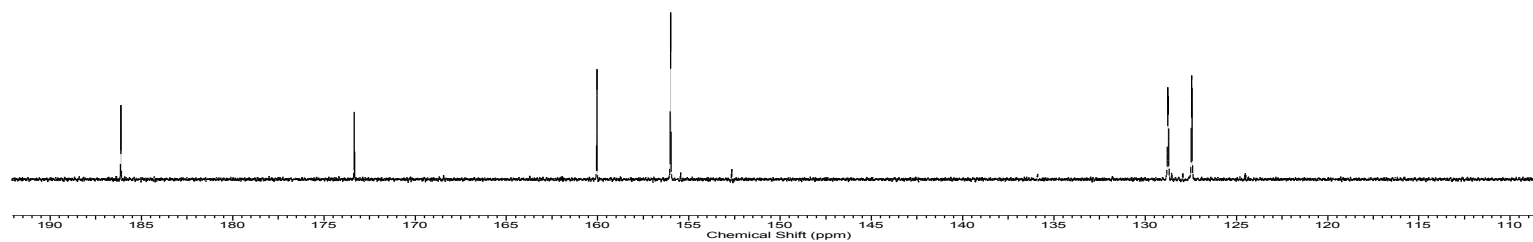

DMR293CARBON

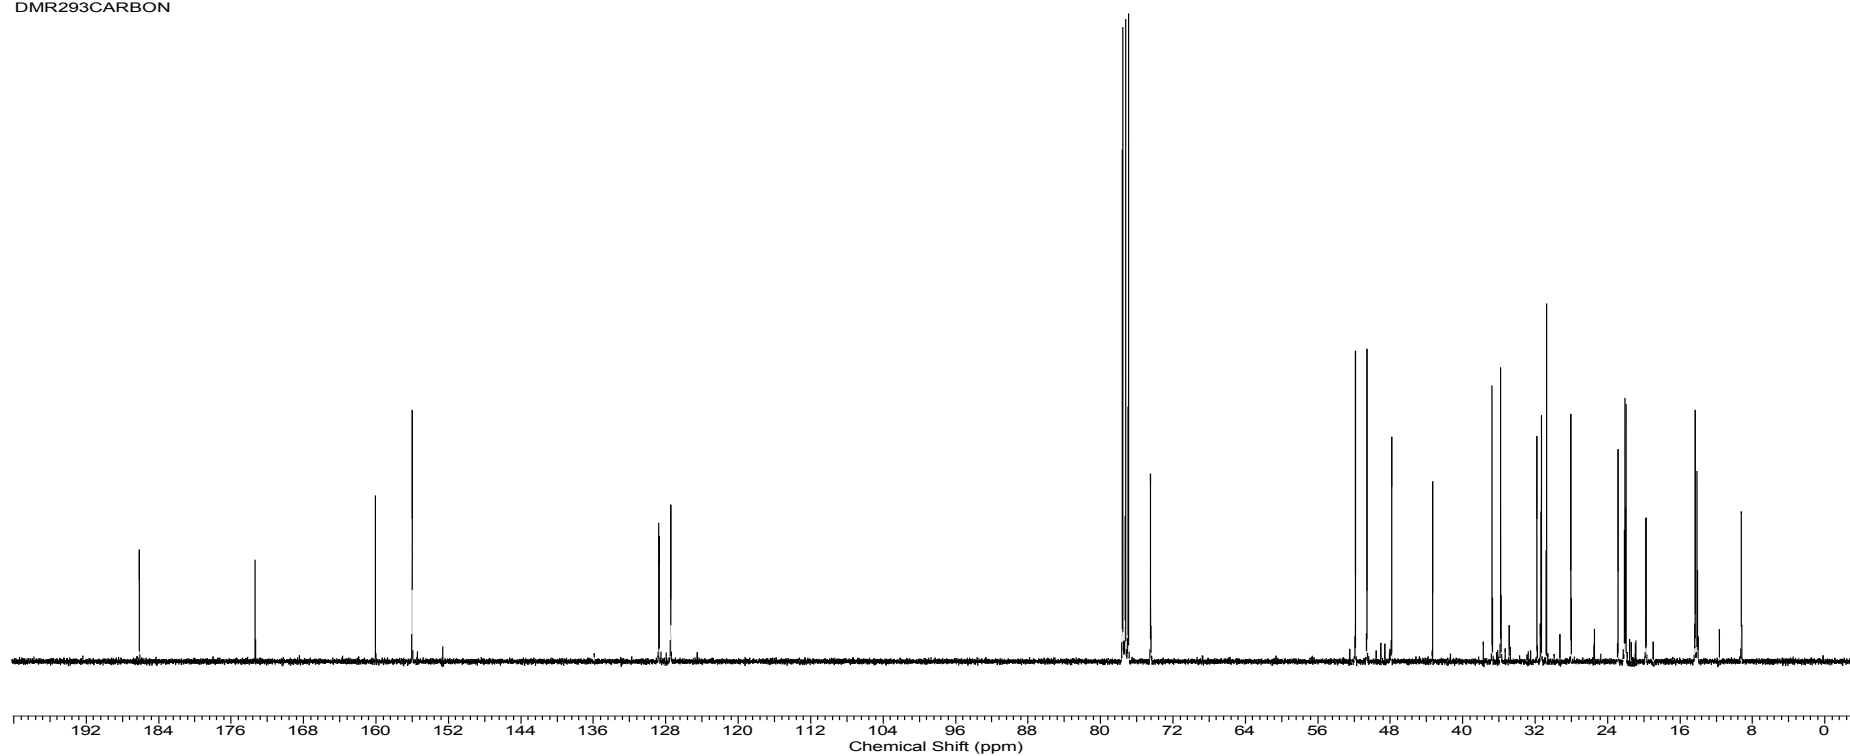

(6*R*,8*R*,9*S*,10*R*,13*S*,14*S*)-10,13-dimethyl-3,17-dioxo-6,7,8,9,10,11,12,13,14,15,16,17-dodecahydro-3*H*-cyclopenta[*a*]phenanthren-6-yl 2-phenylacetate

8g

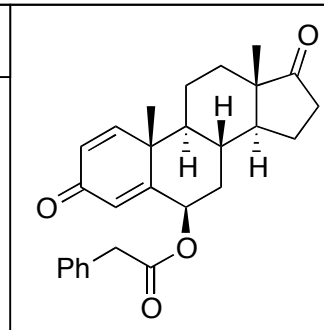

DMR296\_LONG

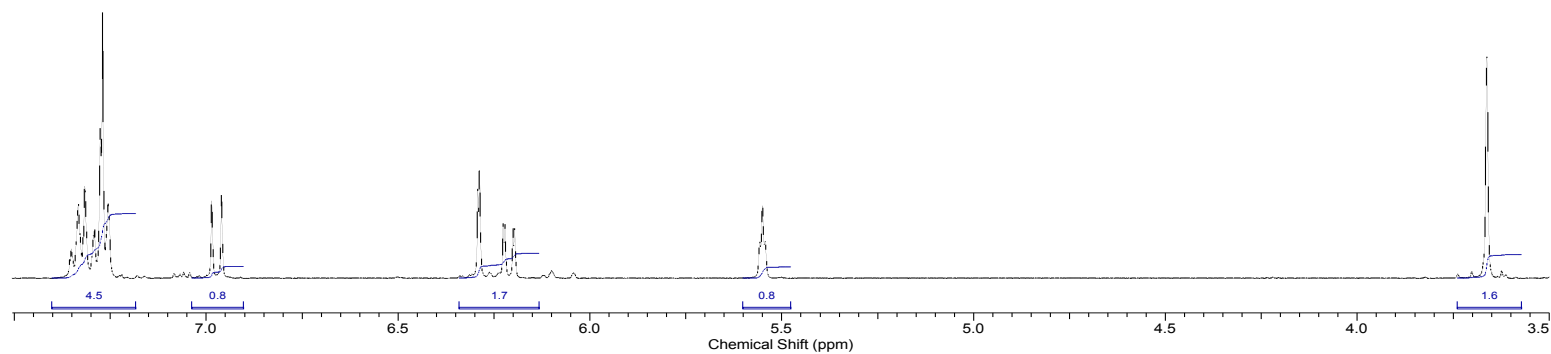

DMR296\_LONG

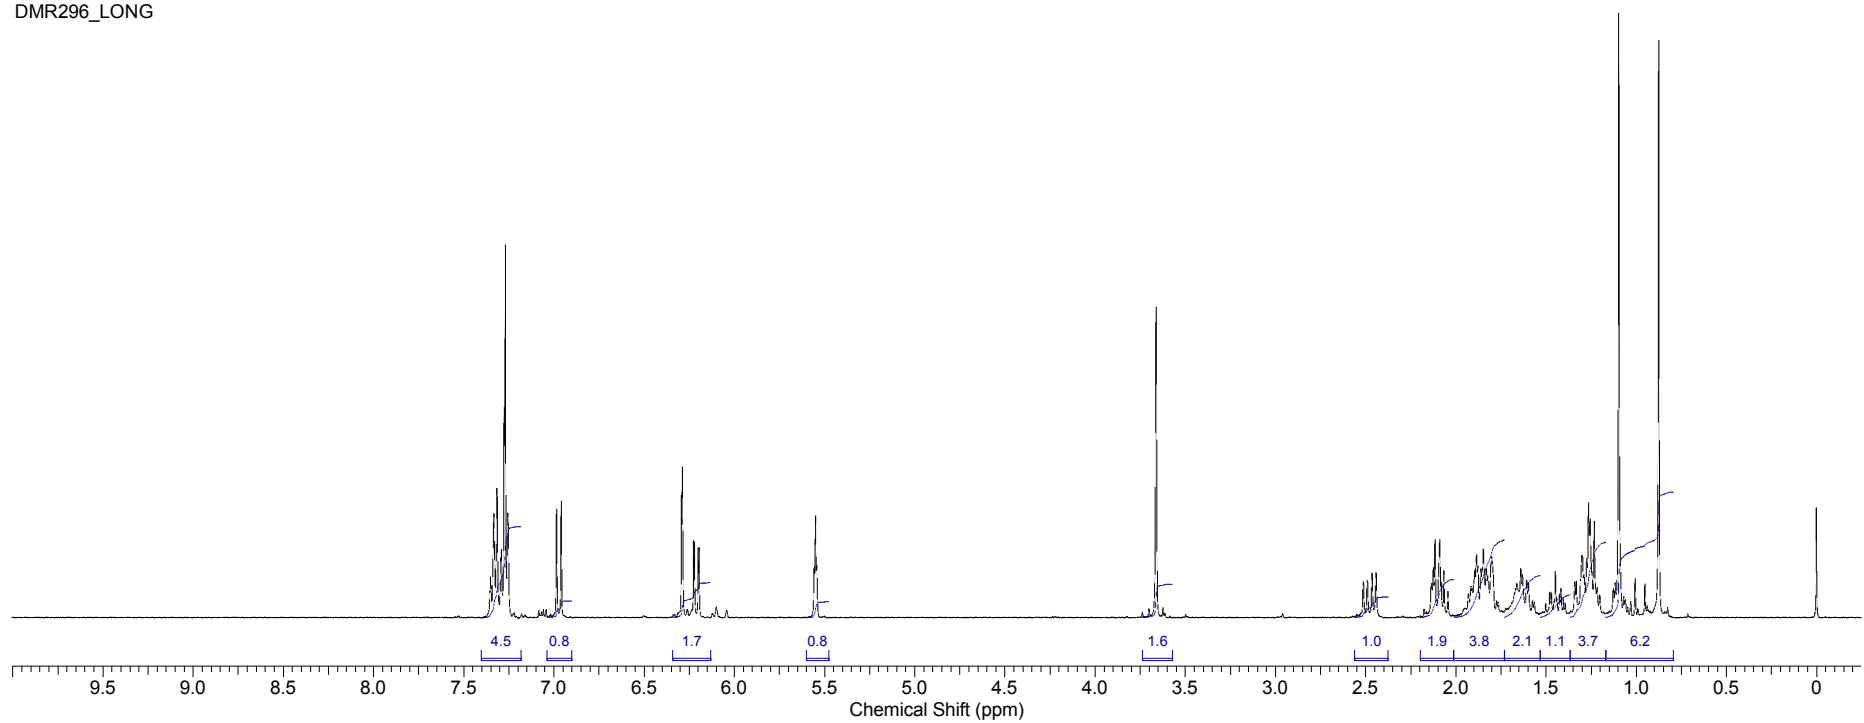

(6*R*,8*R*,9*S*,10*R*,13*S*,14*S*)-10,13-dimethyl-3,17-dioxo-6,7,8,9,10,11,12,13,14,15,16,17-dodecahydro-3*H*-cyclopenta[ $\alpha$ ]phenanthren-6-yl 2-phenylacetate

8g

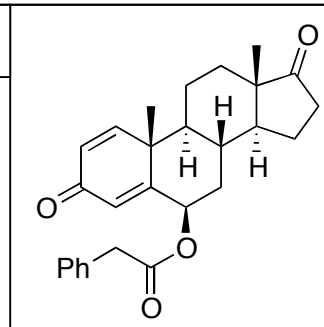

DMR296CARBON

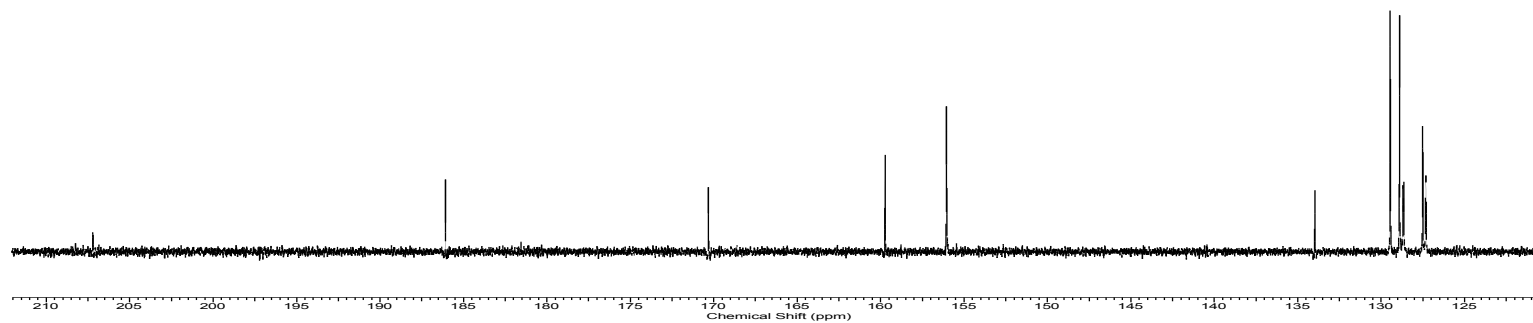

DMR296CARBON

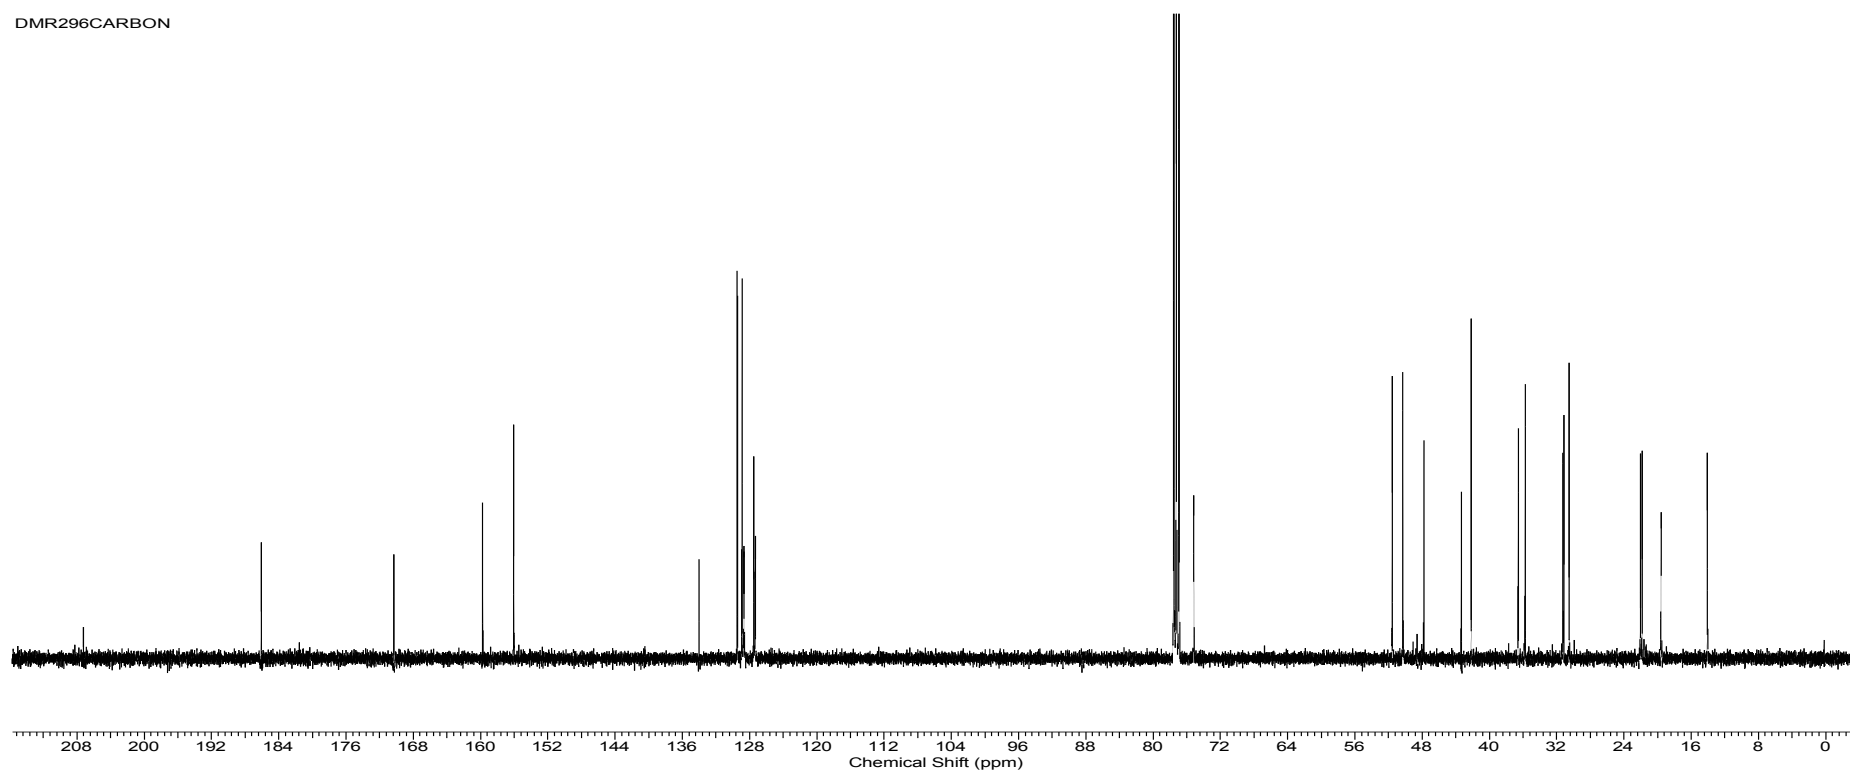



(6*R*,8*R*,9*S*,10*R*,13*S*,14*S*)-6-ethoxy-10,13-dimethyl-7,8,9,10,11,12,13,14,15,16-decahydro-1*H*-cyclopenta[ $\alpha$ ]phenanthrene-3,17(2*H*,6*H*)-dione

**9a**

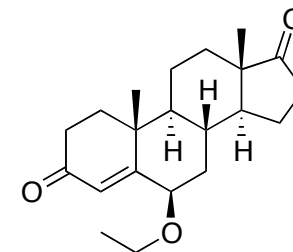

DMR574\_LONG

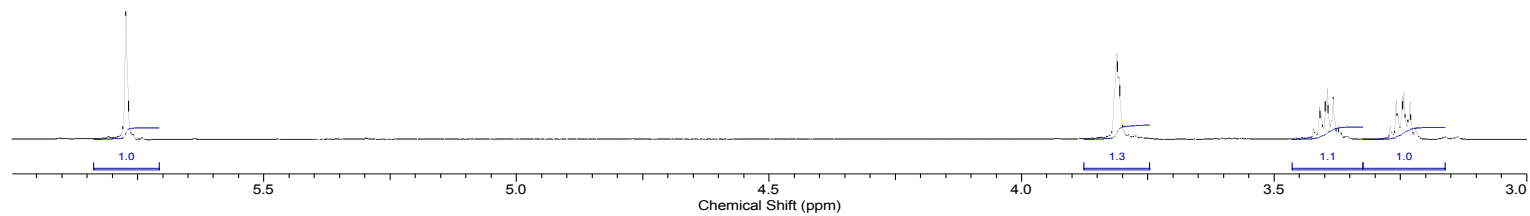

DMR574\_LONG

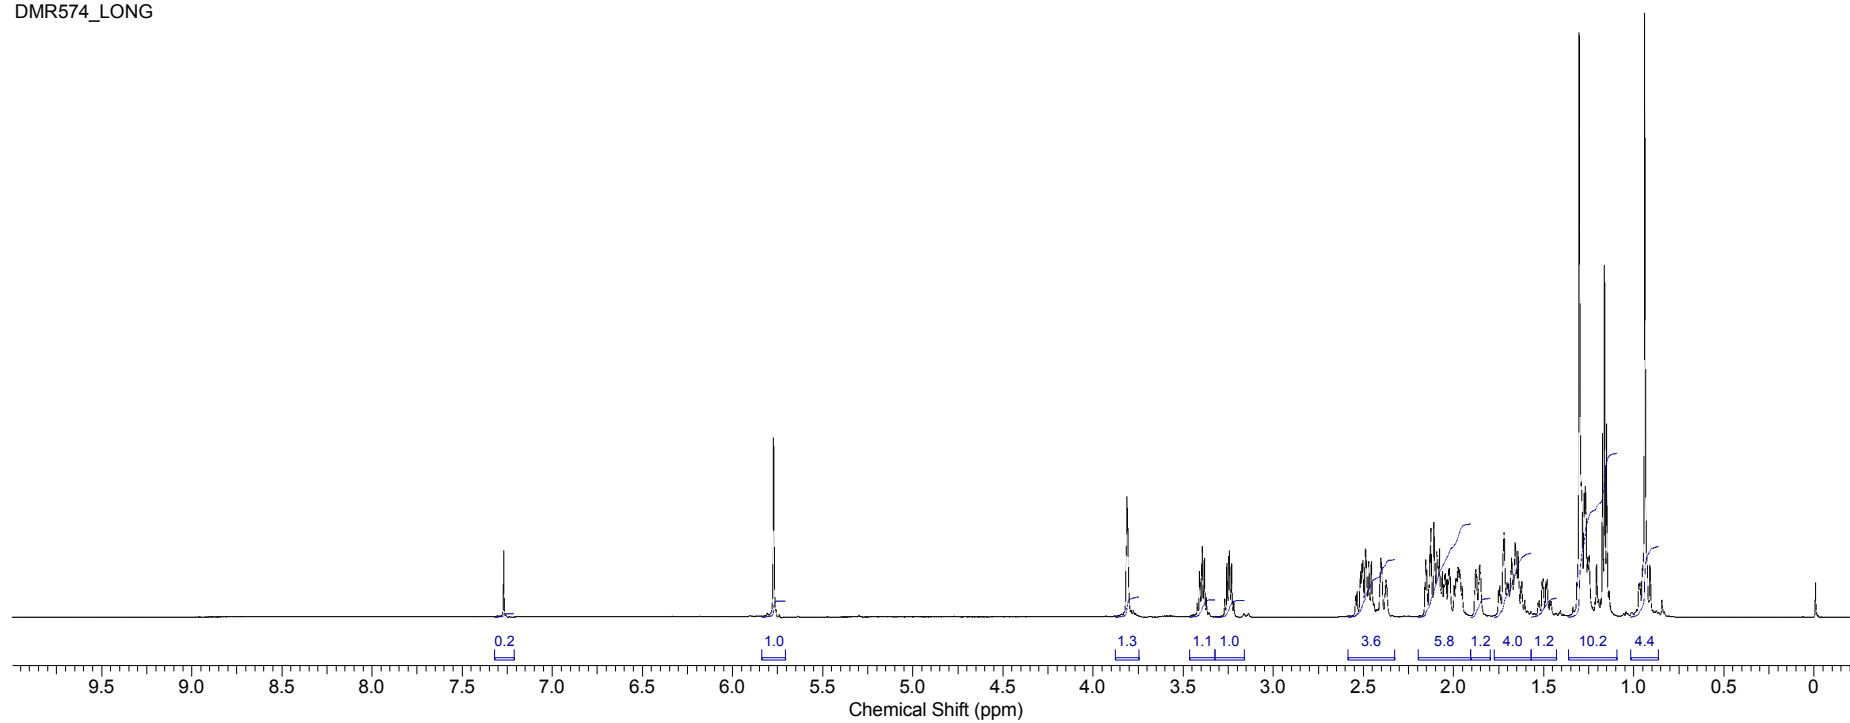

(6*R*,8*R*,9*S*,10*R*,13*S*,14*S*)-6-ethoxy-10,13-dimethyl-7,8,9,10,11,12,13,14,15,16-decahydro-1*H*-cyclopenta[ $\alpha$ ]phenanthrene-3,17(2*H*,6*H*)-dione

**9a**

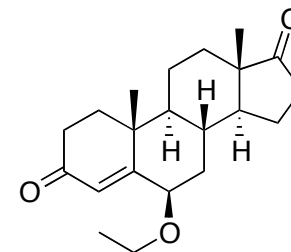

DMR574CARBON

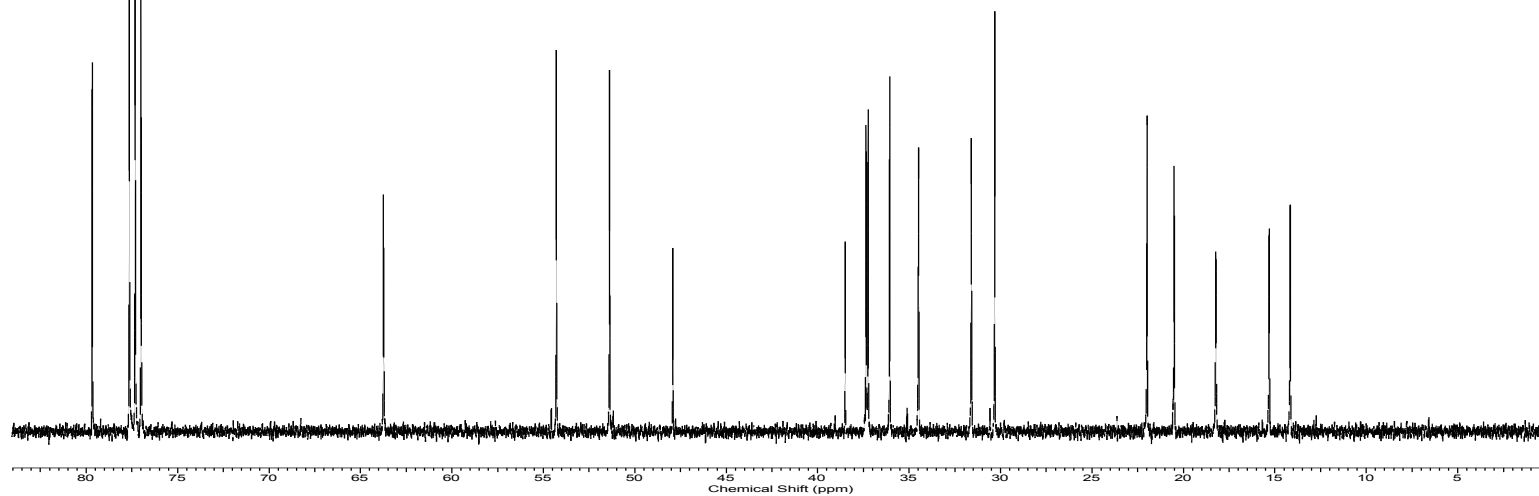

DMR574CARBON

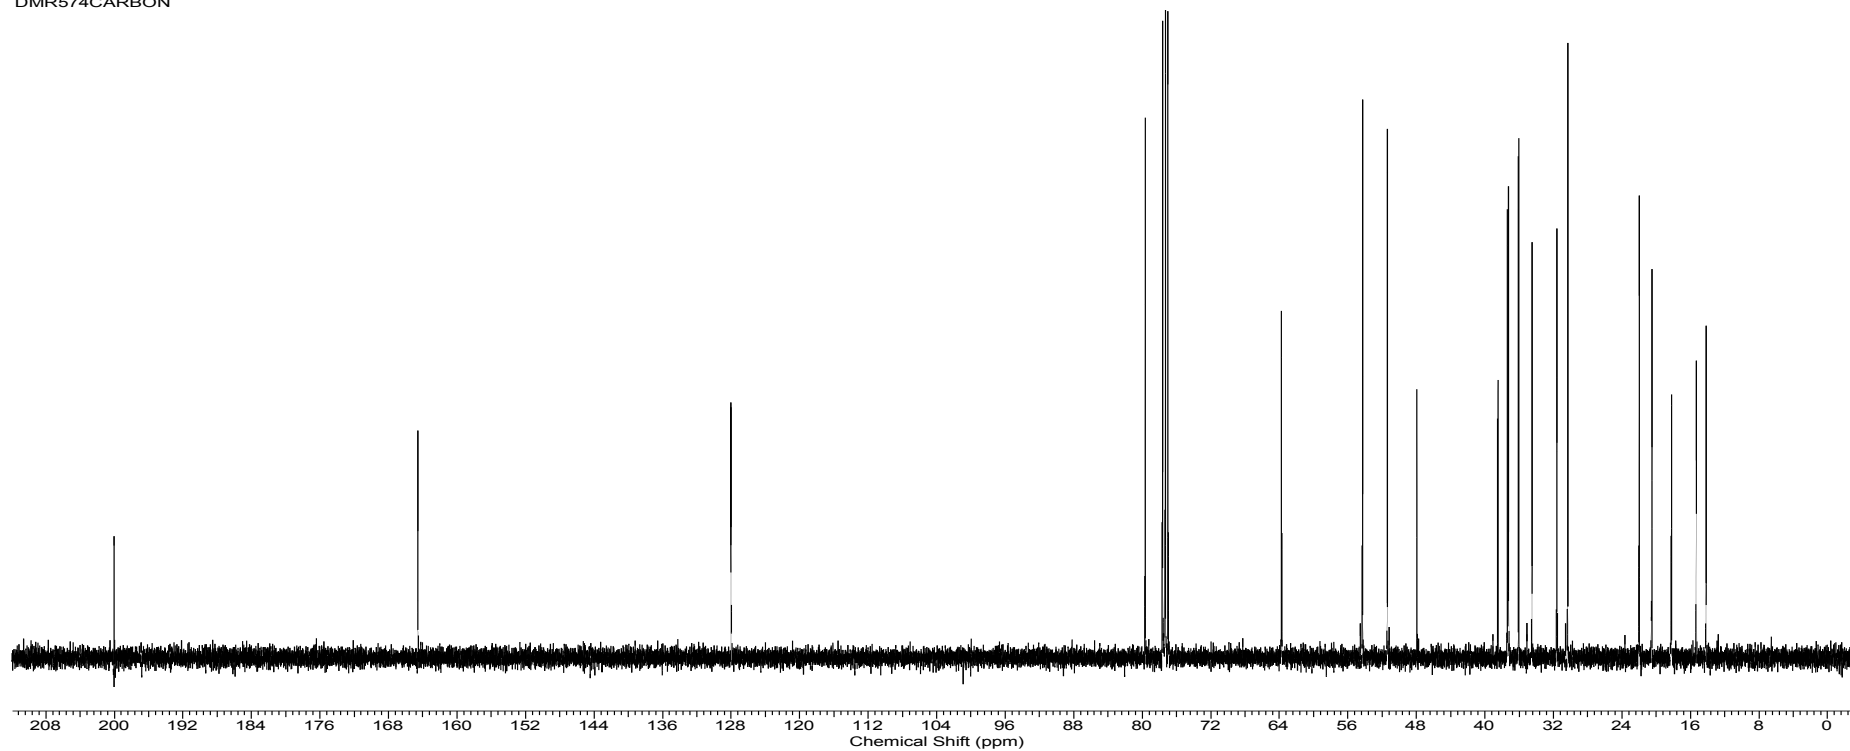

(6*R*,8*R*,9*S*,10*R*,13*S*,14*S*)-6-methoxy-10,13-dimethyl-7,8,9,10,11,12,13,14,15,16-decahydro-1*H*-cyclopenta[ $\alpha$ ]phenanthrene-3,17(2*H*,6*H*)-dione

**9b**

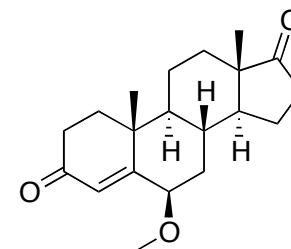

DMR315\_LONG

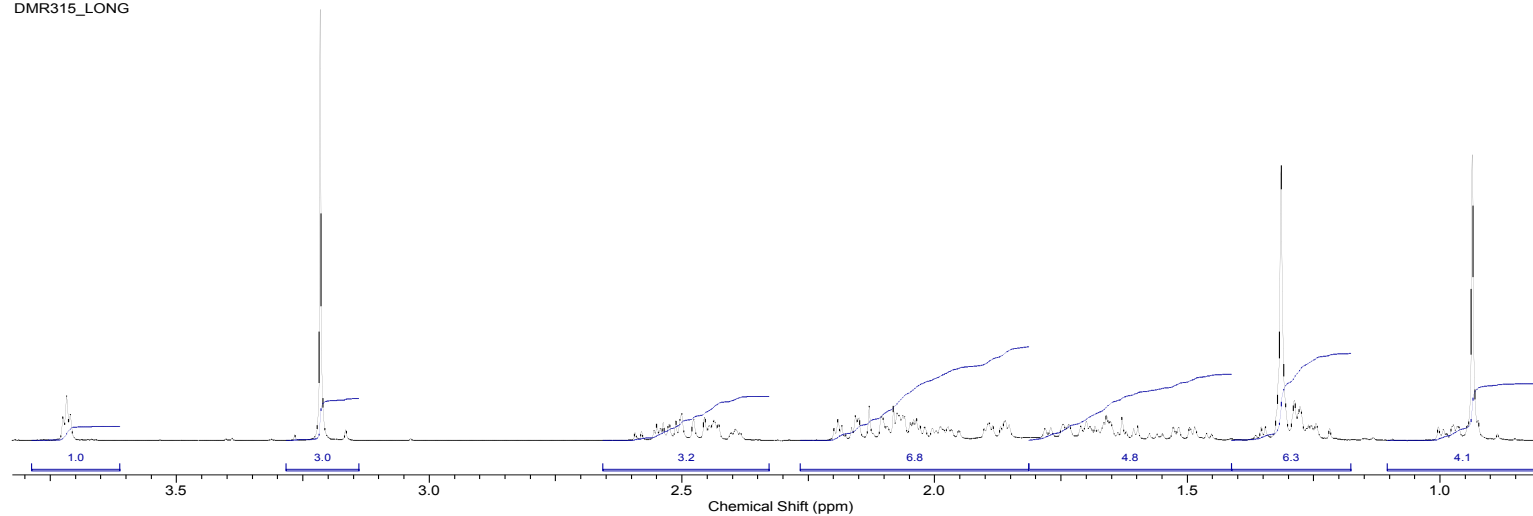

DMR315\_LONG

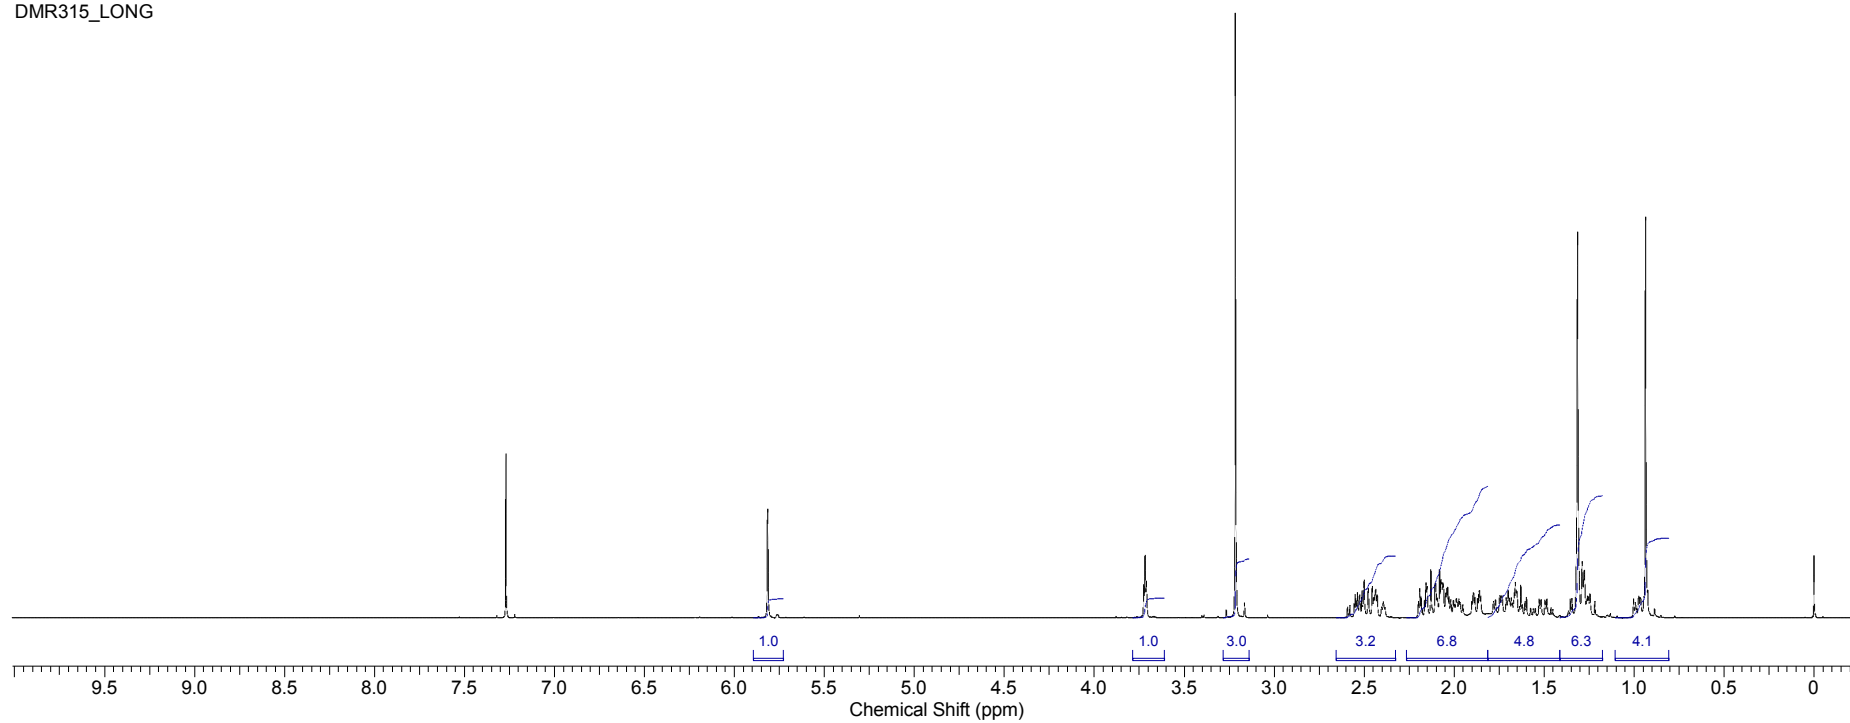

(6*R*,8*R*,9*S*,10*R*,13*S*,14*S*)-6-methoxy-10,13-dimethyl-7,8,9,10,11,12,13,14,15,16-decahydro-1*H*-cyclopenta[ $\alpha$ ]phenanthrene-3,17(2*H*,6*H*)-dione

**9b**

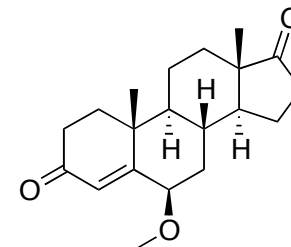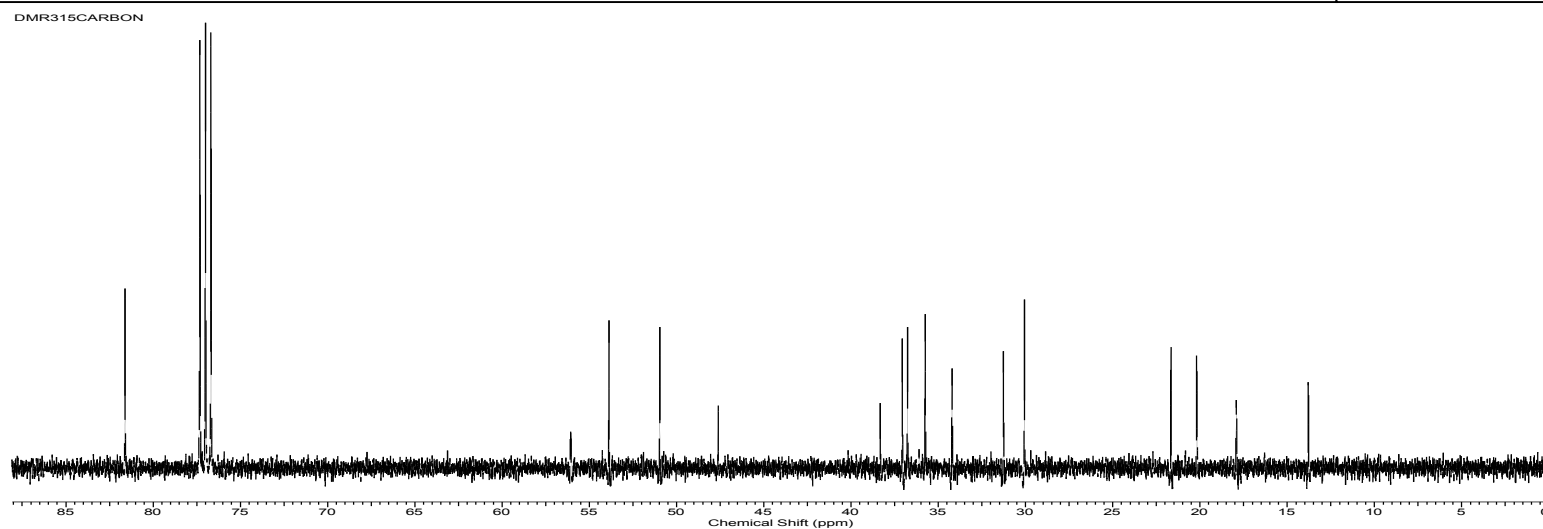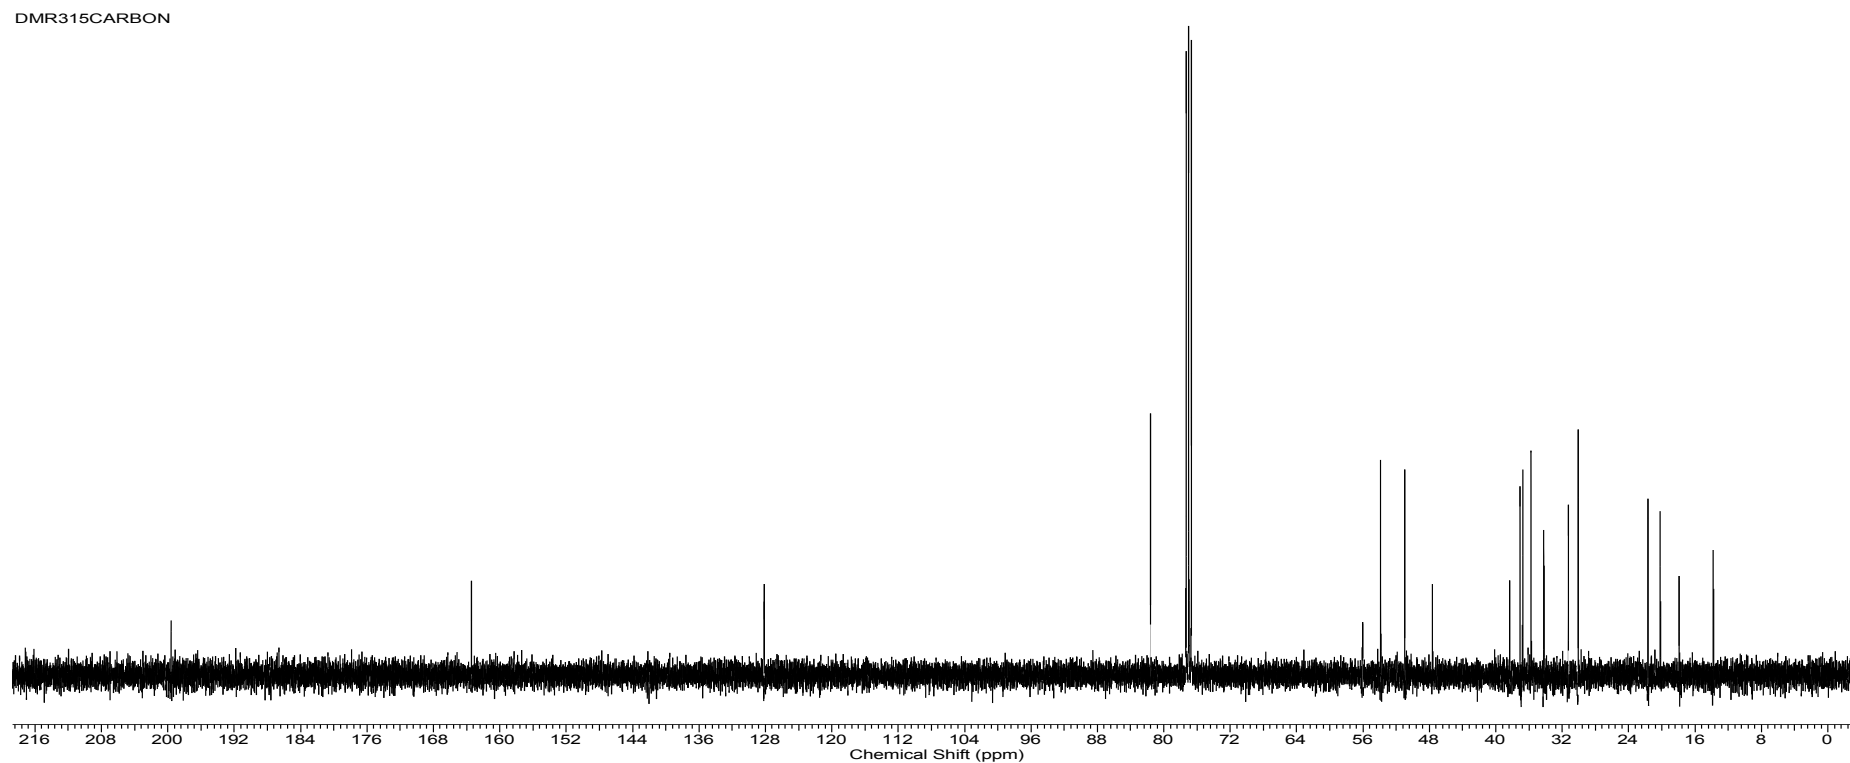

(6*R*,8*R*,9*S*,10*R*,13*S*,14*S*)-6-(benzyloxy)-10,13-dimethyl-7,8,9,10,11,12,13,14,15,16-decahydro-1*H*-cyclopenta[ $\alpha$ ]phenanthrene-3,17(2*H*,6*H*)-dione

9c

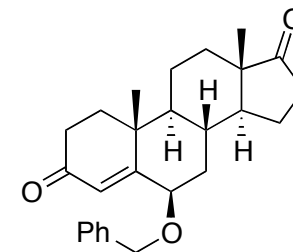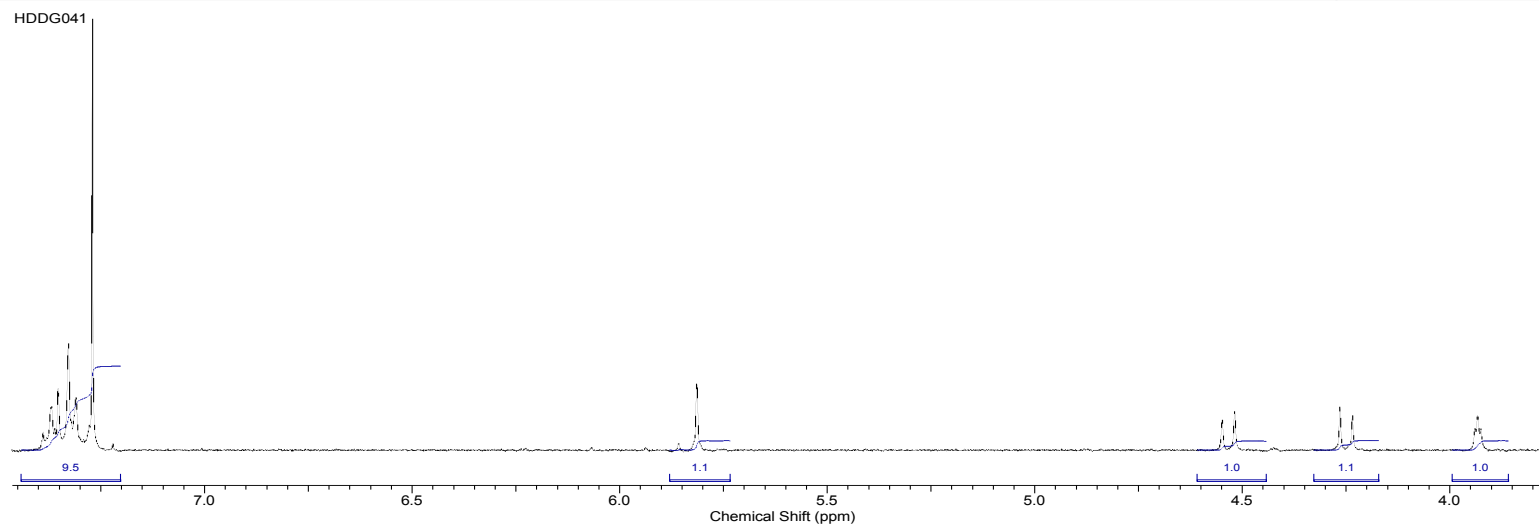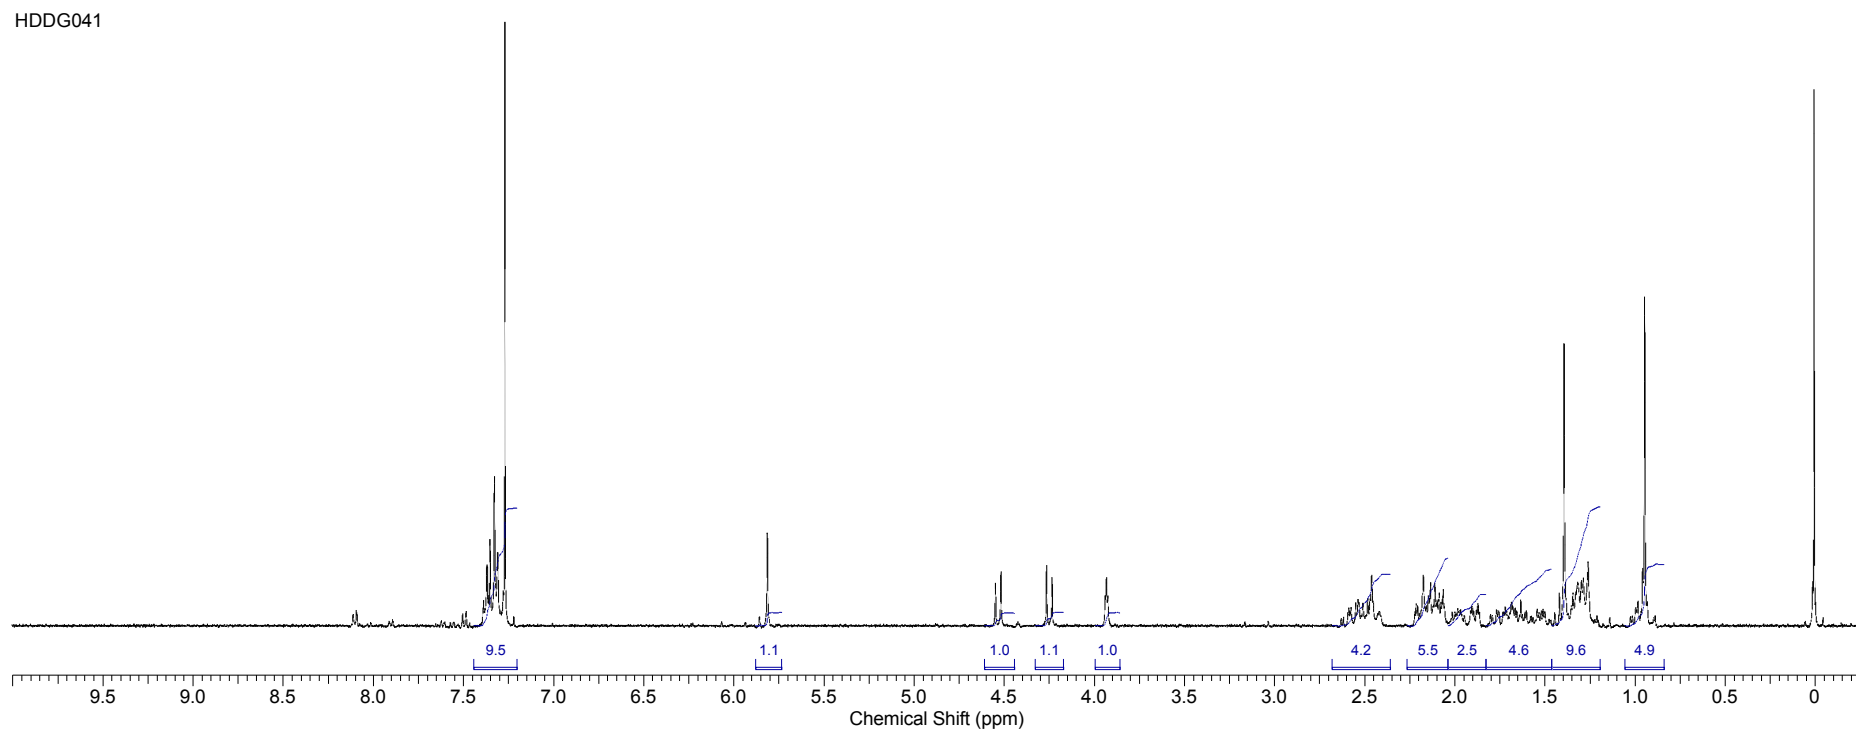

(6*R*,8*R*,9*S*,10*R*,13*S*,14*S*)-6-(benzyloxy)-10,13-dimethyl-7,8,9,10,11,12,13,14,15,16-decahydro-1*H*-cyclopenta[ $\alpha$ ]phenanthrene-3,17(2*H*,6*H*)-dione

9c

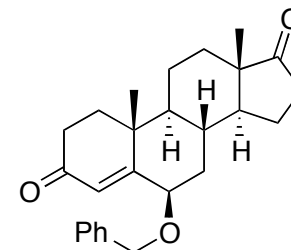

HDDG041CARBON

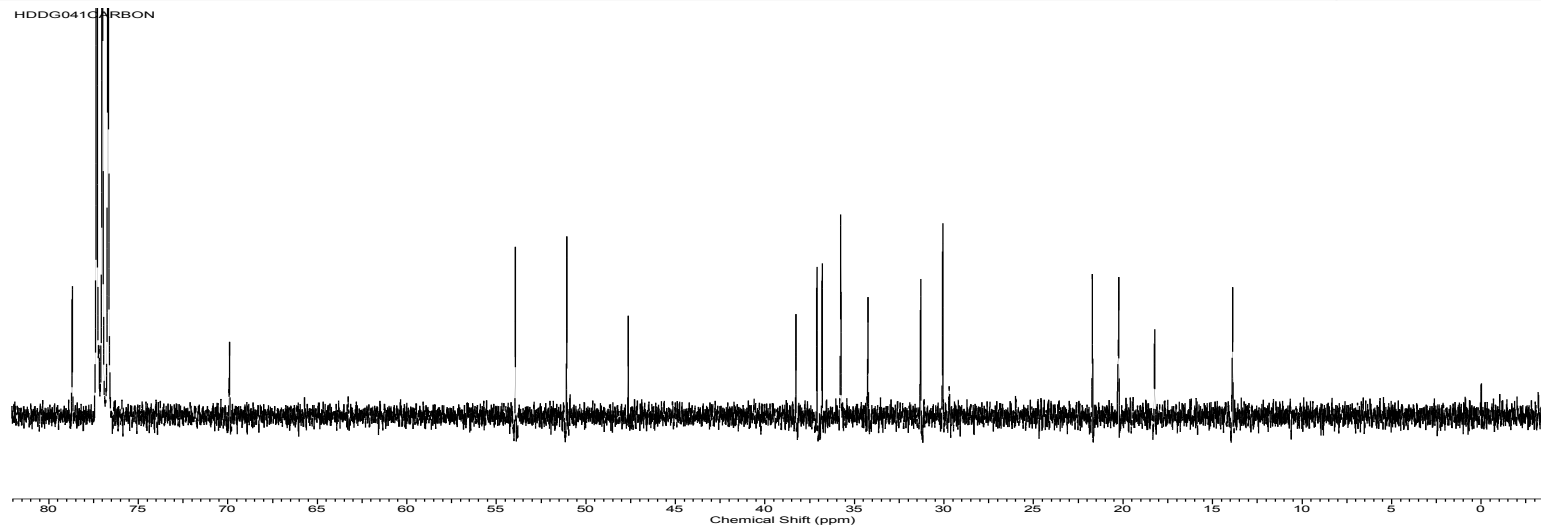

HDDG041CARBON

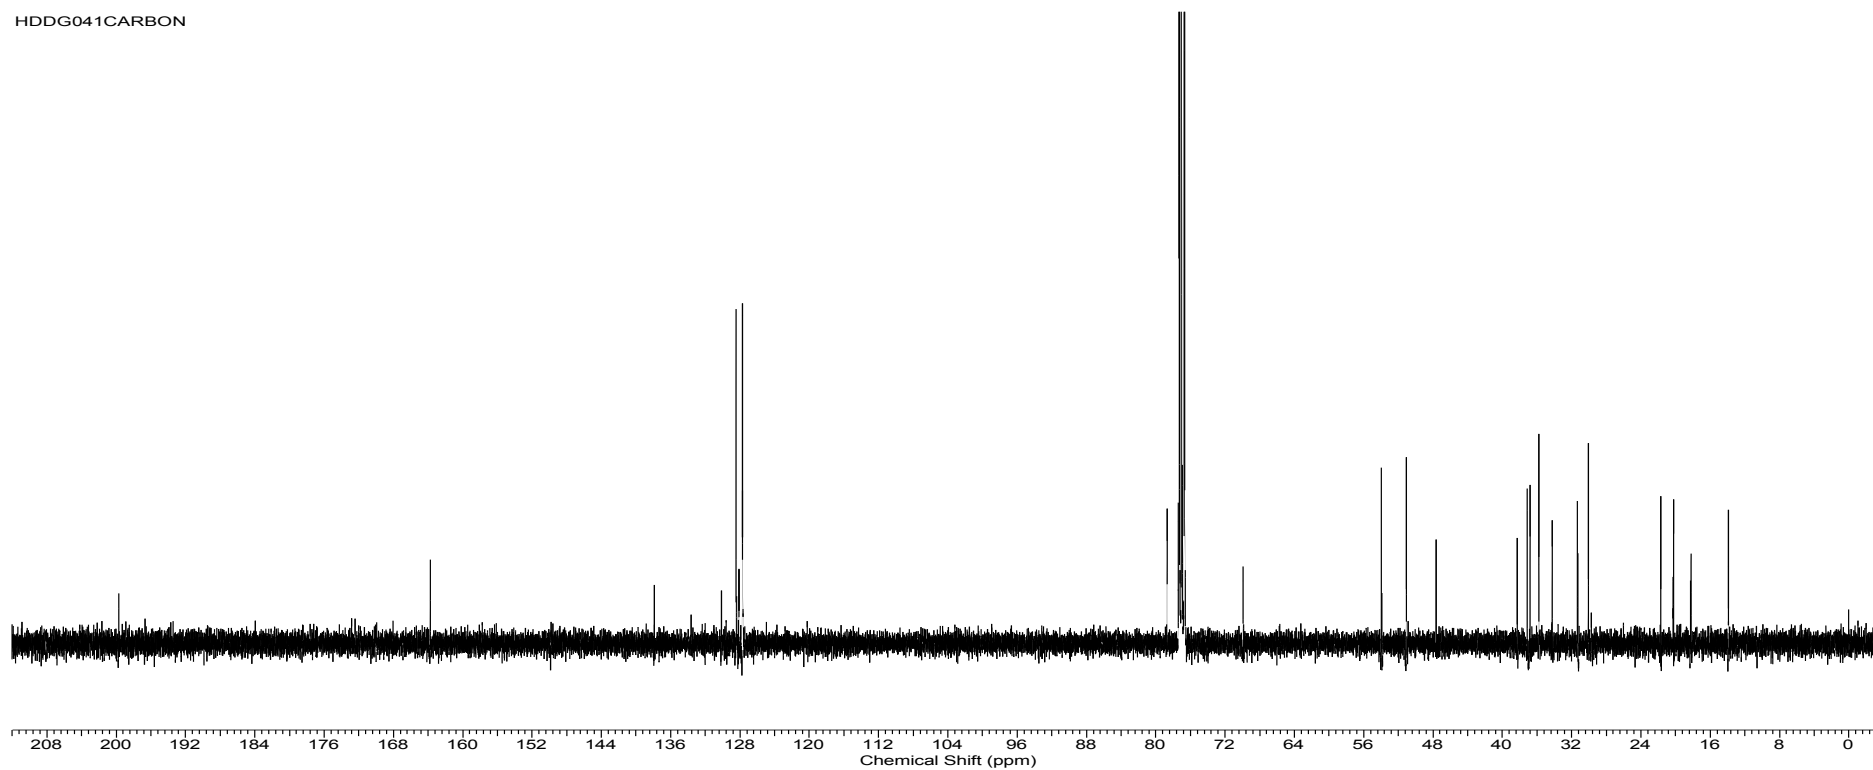

(6*R*,8*R*,9*S*,10*R*,13*S*,14*S*)-6-(*tert*-butoxy)-10,13-dimethyl-7,8,9,10,11,12,13,14,15,16-decahydro-1*H*-cyclopenta[ $\alpha$ ]phenanthrene-3,17(2*H*,6*H*)-dione

**9d**

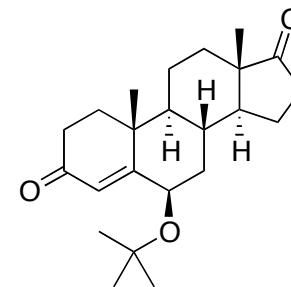

DMR376A

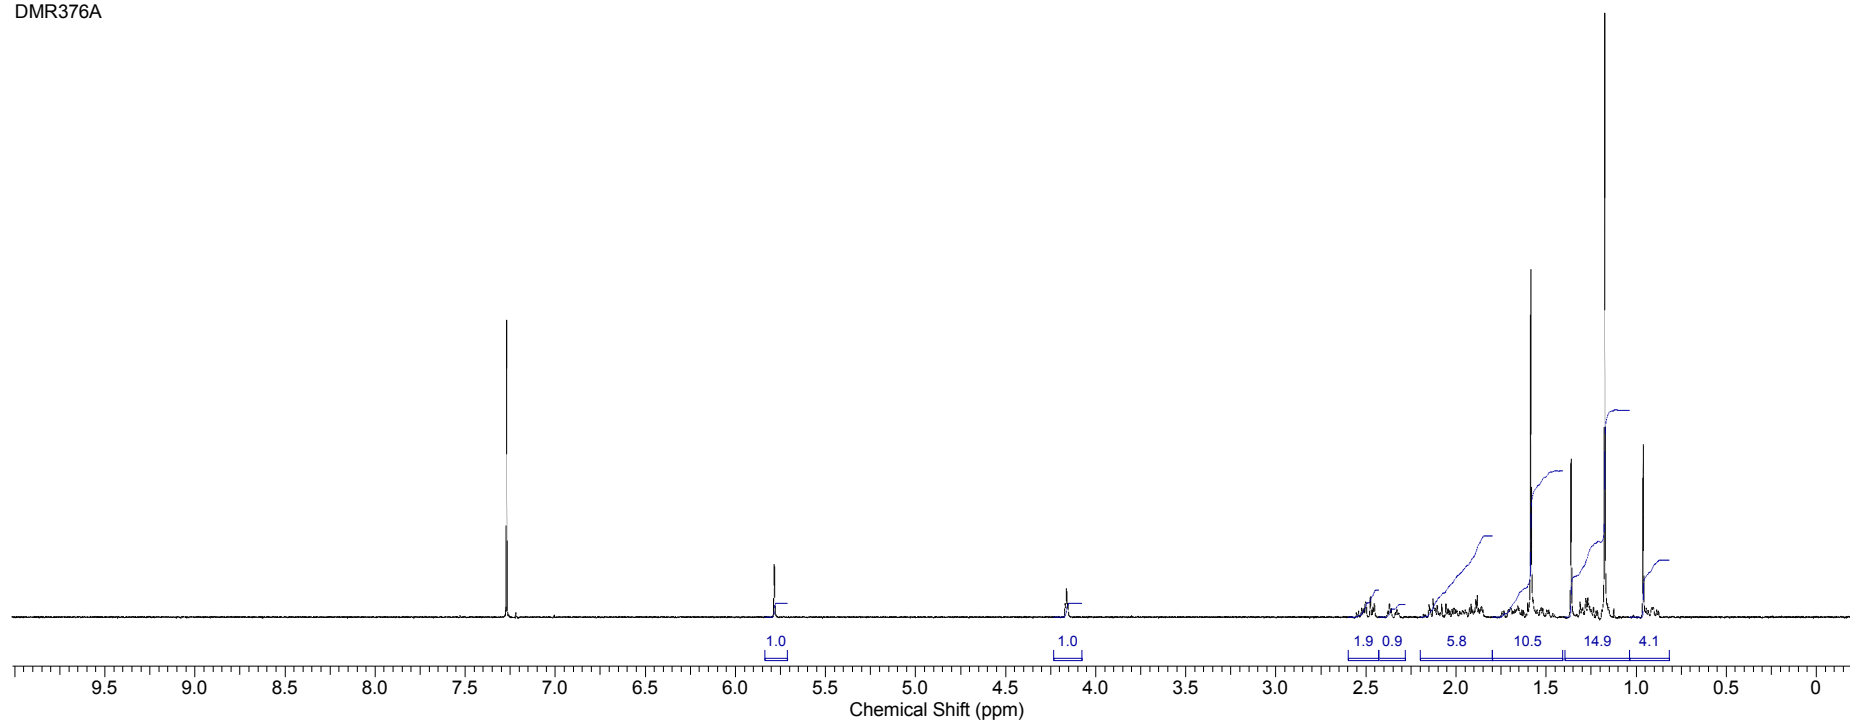

(6*R*,8*R*,9*S*,10*R*,13*S*,14*S*)-6-(*tert*-butoxy)-10,13-dimethyl-7,8,9,10,11,12,13,14,15,16-decahydro-1*H*-cyclopenta[ $\alpha$ ]phenanthrene-3,17(2*H*,6*H*)-dione

9d

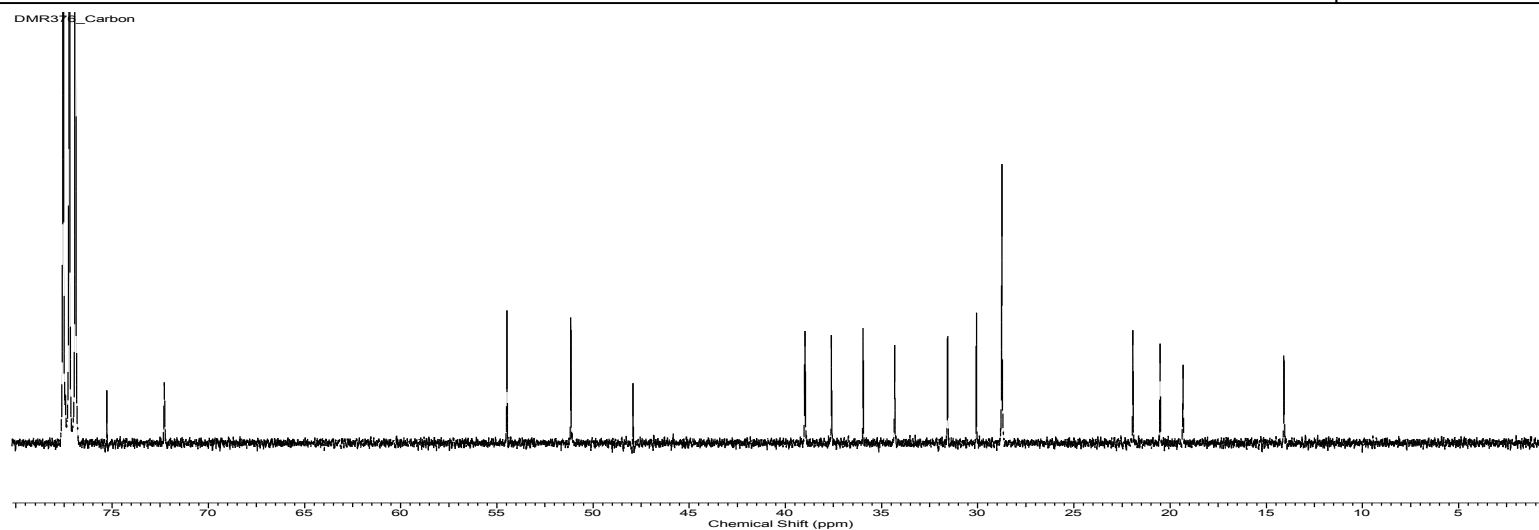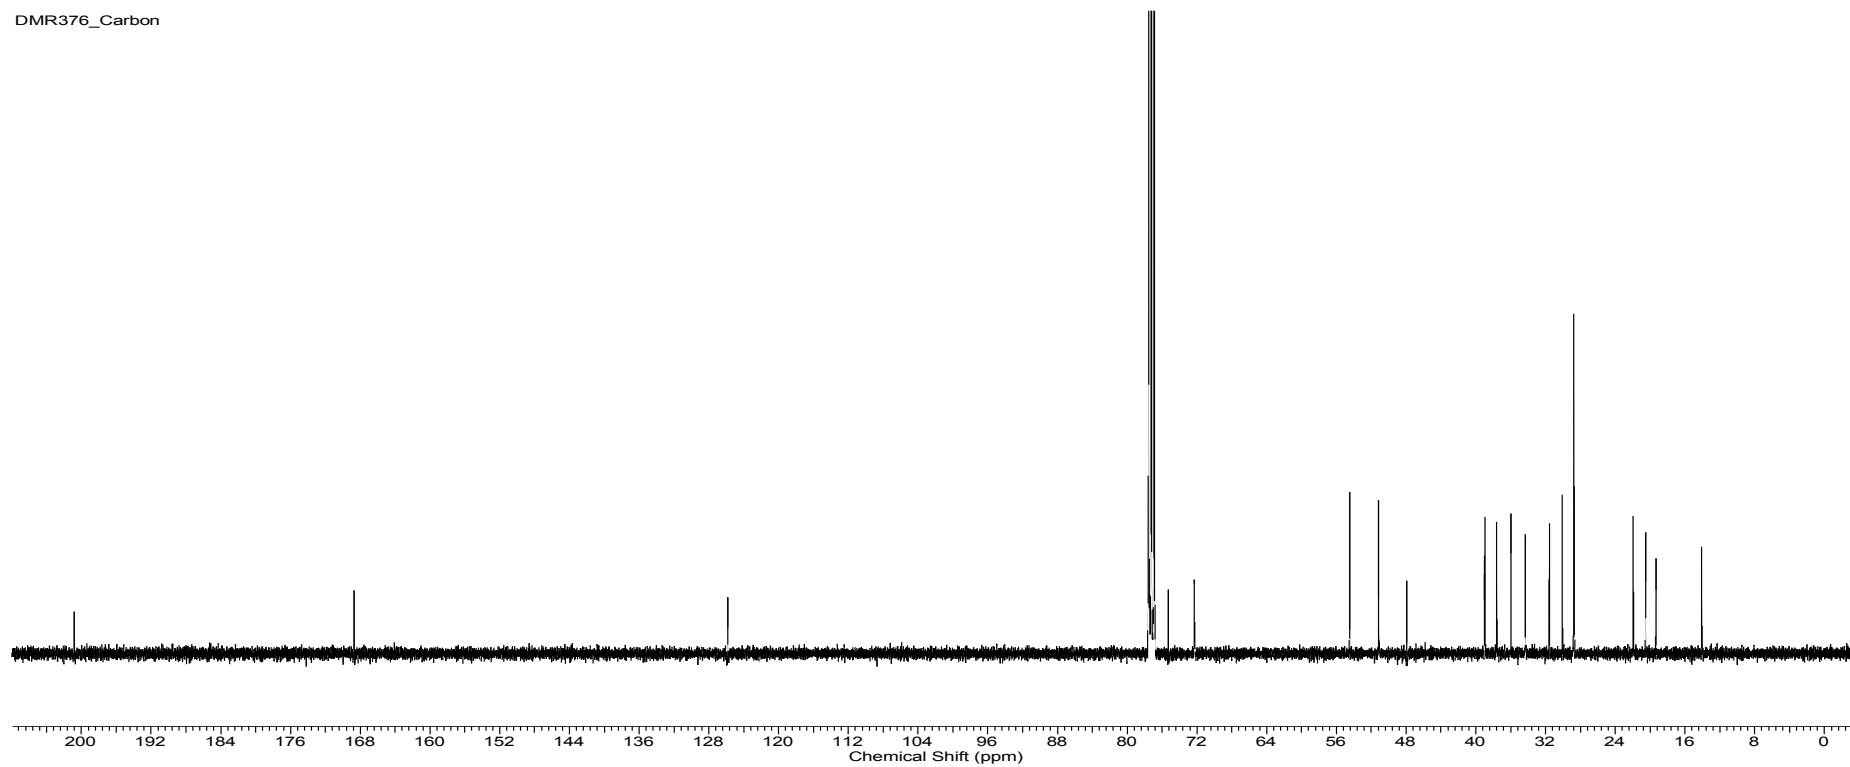

Supplement: NIHMS376594-supplement-ESI_2.pdf [file NIHMS376594-supplement-ESI_2.pdf]
